# Supplementary material for: Genome-wide identification, evolution and expression analysis of RING finger protein genes in Brassica rapa
Source: PubMed Central journal article supplement (PMC5240574; doi:10.1038/srep40690), 2017-01-17

Supplementary Information

Genome-wide identification, evolution and expression analysis of RING finger protein genes in *Brassica rapa*

Intikhab Alam, Yan-Qing Yang, Yong Wang, Mei-Lan Zhu, Heng-Bo Wang, Boulos Chalhouh, Yun-Hai Lu\*

Figure S1 Multiple sequence alignment of 371 RING-H2 domains of *B. rapa*.

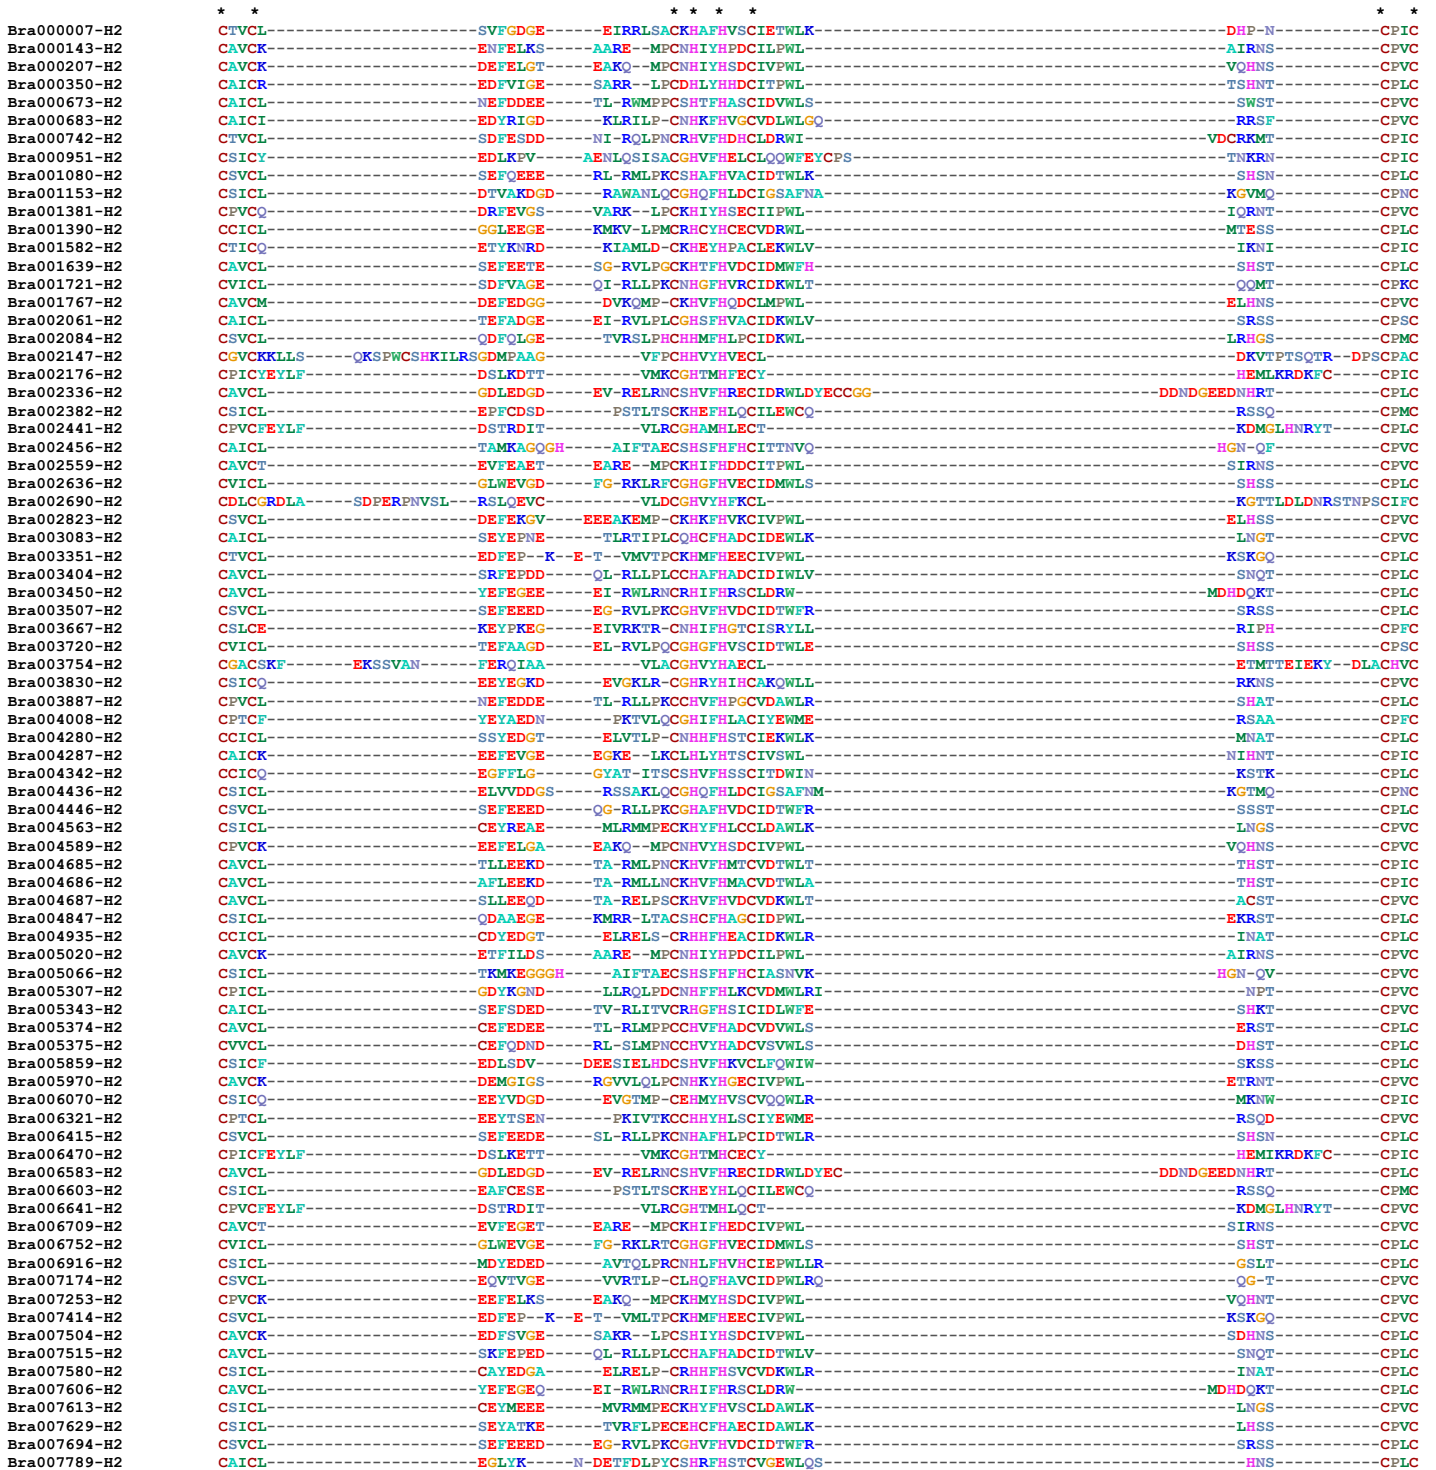

|              |           |                         |                             |                                 |                   |    |
|--------------|-----------|-------------------------|-----------------------------|---------------------------------|-------------------|----|
| Bra007847-H2 | CAICL     | DDFES                   | KTMSMFPCCFHQFHRECLLEWTERS   | RHGGS                           | CPIC              |    |
| Bra007848-H2 | CAICL     | EDMSE                   | QAFQPPCCVHVFEHDCVFKWLCR     | HDS                             | CPIC              |    |
| Bra008015-H2 | CPICL     | NEFEDEE                 | TLRLIPKCCVHFPDCIDAWFQ       | SHAT                            | CPIC              |    |
| Bra008016-H2 | CPVCL     | NEFEDEE                 | RLRLIPKCCVHFPDCIDAWFQ       | SHPT                            | CPIC              |    |
| Bra008018-H2 | CPVCL     | NEFEDEE                 | SLRLIPKCNHAFHSCIDTWLRL      | SHTN                            | CPIC              |    |
| Bra008028-H2 | CAICL     | SDLVKGD                 | KA-RLIPKCNHSHFVPCIDMWFQ     | SHST                            | CPIC              |    |
| Bra008075-H2 | CVVCL     | SELAEGD                 | KA-KLLPSCKHWFHACIDAWLE      | SHAT                            | CPIC              |    |
| Bra008257-H2 | CAICL     | TEFAAGD                 | EL-RVLPQCGHGFHVSICDITWLG    | SHSS                            | CPIC              |    |
| Bra008462-H2 | CPVCL     | ERLDQDTGG               | ILTMCNHSFHSCISKNWPD         | S                               | CPIC              |    |
| Bra008475-H2 | CCICL     | ARYGDDE                 | EVRELP-CLHVFVDCVDKWLK       | INAT                            | CPIC              |    |
| Bra008518-H2 | CRICQ     | DEFEGGE                 | QV-RSLRNCARVHFKTCIDRW       | IHDDKMT                         | CPIC              |    |
| Bra008671-H2 | CAICM     | GDFVVKE                 | KVTR-LPCWHYHFGECIVPWL       | EMKNT                           | CPIC              |    |
| Bra008675-H2 | CPICL     | EEYTSN                  | PKIVTKCSHHFHLGCIYEMWE       | RSBD                            | CPIC              |    |
| Bra009015-H2 | CSICQ     | EEYVDGD                 | EVGTMP-CEHMVHVSQVQWLR       | MKNW                            | CPIC              |    |
| Bra009037-H2 | CSVCL     | SEFEDEE                 | GV-RLIPKCSHAFHVSICDITWLL    | SHKN                            | CPIC              |    |
| Bra009136-H2 | CAVCL     | ARFEPTE                 | VL-RLIPKCKHAFHVSICDITWLD    | ABST                            | CPIC              |    |
| Bra009297-H2 | CSICL     | CDYVARD                 | PVRCIPECNHCFHADCVDEWLRP     | SAT                             | CPIC              |    |
| Bra009323-H2 | CAVCK     | DEMDVGT                 | EAVG-LPCDHKYHTECIVPWL       | KTRNT                           | CPIC              |    |
| Bra009570-H2 | CVICK     | EEMSEGR                 | DVCEMP-CQHLPHFKICLIPWL      | SKRNT                           | CPIC              |    |
| Bra009663-H2 | CSVCL     | QDFQVGE                 | TVRSLPHCHHMFHLPCIDKWL       | RGHAS                           | CPIC              |    |
| Bra009800-H2 | CSICQ     | EEYVDGD                 | EVGTLP-CQHMVHVSQVQWLR       | MKNW                            | CPIC              |    |
| Bra009912-H2 | CPDC      | KLPQDDCP                | LIWACNHSFHLHCLIKWVNS        | QTSQ-AH                         | CPIC              |    |
| Bra009960-H2 | CAICL     | NEFQDDE                 | TL-RLIPKCDHVFHPCIGAWLQ      | GHVT                            | CPIC              |    |
| Bra009962-H2 | CAICL     | TEFGDDE                 | TL-RFLPKCDHVFHACIGAWLQ      | GHVT                            | CPIC              |    |
| Bra010289-H2 | CVVCI     | EGFRQGG                 | WCRKLPCCGHVFRKCVDFWL        | VKVT                            | CPIC              |    |
| Bra010349-H2 | CSVCL     | SKFESVE                 | IL-RLIPKCRHAFHVSICDITWLE    | QHAT                            | CPIC              |    |
| Bra010370-H2 | CVICM     | TAINLRQR                | TSDFMVTFCEHFFHFGICLQR       | WMDTKME                         | CPIC              |    |
| Bra010473-H2 | CAICR     | EPM                     | KAKRLHCNHLFHLGCLRSWLDQGL    | NDVYS                           | CPIC              |    |
| Bra010532-H2 | CAICL     | MEFSDEE                 | EI-RLIPKCRHAFHVSICDITWLT    | SRSS                            | CPIC              |    |
| Bra010641-H2 | CAICL     | NELEDRE                 | TV-RLIPKCNHVFHPCIDAWLY      | SHAT                            | CPIC              |    |
| Bra010702-H2 | CGACSRPLS | EKSLWSSQKMFMTNELSVSA    | ILACGHVHGECL                | EKMTPEIDKF                      | DPS               |    |
| Bra010752-H2 | CSICL     | ESFTPOD                 | PATVTSCKEYHLCQIEIWSQ        | RSKE                            | CPIC              |    |
| Bra010969-H2 | CCVCL     | CGFKEEE                 | EVSELVSCKHFFHRAICLDMWFQ     | NNHTT                           | CPIC              |    |
| Bra011068-H2 | CSVCL     | SKFESVE                 | IL-RLIPKCRHAFHVSICDITWLE    | QHAT                            | CPIC              |    |
| Bra011187-H2 | CVVCI     | DGFRQGG                 | WCRRLPCCGHVFRKCVDFWL        | VKVT                            | CPIC              |    |
| Bra011189-H2 | CAVCL     | SEFETED                 | KL-RLIPKCSHAFHVSICDITWLL    | SHST                            | CPIC              |    |
| Bra011215-H2 | CLVCL     | DYIEMNT                 | TKQMP-CQKHFSYCLLYWL         | QLHSS                           | CPIC              |    |
| Bra011359-H2 | CCICL     | AKYANNE                 | ELRELP-CSHFFHFKCVDKWLK      | INAS                            | CPIC              |    |
| Bra011618-H2 | CAICL     | TEFTDGE                 | EI-RLIPKCNHAFHVSICDITWLT    | SRSS                            | CPIC              |    |
| Bra011643-H2 | CSVCL     | QDFQVGE                 | TVRSLPHCHHMFHLPCIDNWL       | LRHS                            | CPIC              |    |
| Bra011873-H2 | CGACSRPLS | EKSMWSSQKIFMTNELSVSA    | ILACGHVHGECL                | EKMTPEIDKF                      | DPS               |    |
| Bra011991-H2 | CIICL     | SKFEDEE                 | TV-KVIPHCGLHVFHVDCTWLN      | SHVT                            | CPIC              |    |
| Bra012055-H2 | CAICL     | EDYRFGD                 | SLRLLP-CQHAFHVSICDITWLT     | WGTS                            | CPIC              |    |
| Bra012134-H2 | CVICL     | DELKEND                 | EASTLA-CGHDFHVSICIKWLM      | VKNK                            | CPIC              |    |
| Bra012251-H2 | CAICL     | TEFSNGD                 | EL-RVLPQCGHGFHVSICDITWLG    | SHSS                            | CPIC              |    |
| Bra012330-H2 | CPVCL     | NGFEDDE                 | TL-RLIPQCCVHFPDCIDAWLR      | SHVT                            | CPIC              |    |
| Bra012441-H2 | CVICL     | EEWKAGE                 | TVKEMP-CKRHFGGCVKWL         | GLHGS                           | CPIC              |    |
| Bra012630-H2 | CAICL     | LEFDEED                 | VL-RLITTCYHVFHQBICIDLWFE    | SHKT                            | CPIC              |    |
| Bra012814-H2 | CSICL     | VDEYAEAD                | AVTHLPRCNHVFHVSICDITWLLS    | GHLT                            | CPIC              |    |
| Bra013006-H2 | CAVCR     | EEMSVGN                 | EVAE-LPCRHVHFGECIVPWL       | GRNT                            | CPIC              |    |
| Bra013110-H2 | CTICL     | EPLVNRDD                | RRTFVTLRCGHFHLGCLIGSAFNA    | KGFMQ                           | CPIC              |    |
| Bra013118-H2 | CQQCQ     | AAFDE-SG                | GHQLTRLCGLHAFHVSICLVS       | LIKSLPHTAPPG                    | YVCPIC            |    |
| Bra013211-H2 | CSVCL     | TKFEESG                 | EVNKL-KCGHLPHFKICVKEKID     | YWNIT                           | CPIC              |    |
| Bra013267-H2 | CSICL     | GEFNEEE                 | SL-RLIPKCNHVFHVSICDITWLT    | SHSN                            | CPIC              |    |
| Bra013268-H2 | CAICL     | LEFDGDH                 | VL-RLITTCYHVFHQBICIDLWFE    | SHKT                            | CPIC              |    |
| Bra013751-H2 | CCVCL     | GEFELKE                 | ELVEMPSCKHIFHLDCIHLWL       | YSHTT                           | CPIC              |    |
| Bra013876-H2 | CAICR     | EPMA                    | KAKRLHCNHLFHLGCLRSWLDQGL    | NEVYS                           | CPIC              |    |
| Bra014043-H2 | CCVQ      | EEYKEGE                 | EMGVLE-CGHDFHVSICIKWLM      | RKNL                            | CPIC              |    |
| Bra014174-H2 | CVICL     | SDFVCGE                 | KL-RLIPKCNHGFHVSICDITWLL    | QHLT                            | CPIC              |    |
| Bra014175-H2 | CVICL     | SDFVCGE                 | KL-RLIPKCNHGFHVSICDITWLL    | QHLT                            | CPIC              |    |
| Bra014177-H2 | CVICL     | SEFVSEE                 | RV-KLLPTCHHGFHVSICDITWLLS   | SHSS                            | CPIC              |    |
| Bra014221-H2 | CSICL     | ESFTNGD                 | MLISLP-CTHSHSSCNPWLIA       | CG-D                            | CPIC              |    |
| Bra014266-H2 | CAVCK     | EVFSLGN                 | ETIQ-LPCLHLYHPCIVPWL        | GARNS                           | CPIC              |    |
| Bra014339-H2 | CVICL     | STLKSGE                 | EVKRL-GCRHVFHVSICDITWLL     | HINFK                           | CPIC              |    |
| Bra014424-H2 | CSICL     | SEYASSE                 | TVGCLLICEHCFHVSICDITWLL     | LRSS                            | CPIC              |    |
| Bra014435-H2 | CAVCL     | YEFEGDQ                 | EI-RRLRNCRHIFHVSICDITWLR    | MDHDKT                          | CPIC              |    |
| Bra014499-H2 | CPICL     | EDGES-D                 | Q-MPFMKLMSCFHCFHVSICDITWLLS | GNSGSVDKSLGN                    | CPIC              |    |
| Bra014508-H2 | CAVCL     | QEAEGD                  | KMRR-LTICRHFHVSICDITWLL     | EMST                            | CPIC              |    |
| Bra014684-H2 | CPVCK     | EEFELKS                 | EAKQ-MPCKHVHVSICDITWLL      | VQHNT                           | CPIC              |    |
| Bra015142-H2 | CSVCL     | SNFEEDS                 | EINKL-KCGHLPHFKICVKEKID     | YWNIT                           | CPIC              |    |
| Bra015160-H2 | CTACT     | FTLDIP                  | AVHFM-CMHSFHQRCIG           | DMETE                           | CPIC              |    |
| Bra015221-H2 | CCICQ     | EEYAGD                  | DLGTL-EGHVFHVSICDITWLL      | LKNL                            | CPIC              |    |
| Bra015225-H2 | CAICL     | DQFKTGE                 | TLVHLP-CTHVFHVSICDITWLL     | NA-Y                            | CPIC              |    |
| Bra015233-H2 | CSICL     | DDLSKT                  | RENIIELPQLHVFHVSICDITWLL    | RQNS                            | CPIC              |    |
| Bra015308-H2 | CSVCL     | NEFQEDE                 | KL-RIIPNCCVHVSICDITWLL      | SNAN                            | CPIC              |    |
| Bra015349-H2 | CVICL     | ETPTIGD                 | TIRHLP-CFHVFHVSICDITWLL     | SK-A                            | CPIC              |    |
| Bra015751-H2 | CAICL     | TEFAAGD                 | EL-RVLPQCGHGFHVSICDITWLG    | SHSS                            | CPIC              |    |
| Bra015846-H2 | CGACSKLLT | ERSSVAN                 | FELPIAA-VLACGHVHGECL        | ETMTEIEKY                       | DPA               |    |
| Bra015894-H2 | CPICHEYIF | TSSSPVK                 | ALPCGHLHMSKCF               | KDYT-CSHYT                      | CPIC              |    |
| Bra015913-H2 | CTICL     | QDIAGE                  | ITRGLPRCDHTFHLVDCVVKWL      | IRHGS                           | CPIC              |    |
| Bra015967-H2 | CSICQ     | EDYEAKD                 | EVGKLR-CGHRVHVSICVQWLL      | RYNC                            | CPIC              |    |
| Bra016067-H2 | CAICL     | SALVKGD                 | KA-RLIPKCSHSHFVPCIDMWFQ     | SHST                            | CPIC              |    |
| Bra016079-H2 | CPVCL     | NEFQEDE                 | SL-RLIPKCNHAFHVSICDITWLR    | SHTN                            | CPIC              |    |
| Bra016093-H2 | CAICL     | EDYSVGD                 | KLRLLP-CRKHVFHVSICDITWLL    | WRTE                            | CPIC              |    |
| Bra016449-H2 | CAICL     | TEFTAGD                 | EL-RVLPQCGHGFHVSICDITWLG    | SHSS                            | CPIC              |    |
| Bra016574-H2 | CSICQ     | DEYEREC                 | QVGKLE-CGHSFHVQCVKQWLS      | RKNA                            | CPIC              |    |
| Bra016759-H2 | CCICL     | SAYEDGT                 | EIRELP-CGHVFHVSICDITWLL     | INAT                            | CPIC              |    |
| Bra016770-H2 | CGVCKRKI  | LTMTGDFRMAQSYFSAAGPLAFY | VFCGHSFHQAQLITHVTS          | CAHEEQAEHILDQKQILLGSEPPRNINGRSD | DEPITSTTADKLRSELD | IA |
| Bra016880-H2 | CAVCL     | SVFEEQD                 | TA-RELPCRHVFHVSICDITWLL     | TCST                            | CPIC              |    |
| Bra016881-H2 | CAVCL     | SLLEEKD                 | TA-RMLPNCKHVFHVSICDITWLL    | TCST                            | CPIC              |    |
| Bra017177-H2 | CVCK      | SVLADGE                 | EIRQLSACKHVFHVSICDITWLL     | TRS-N                           | CPIC              |    |
| Bra017205-H2 | CAICL     | AEYKECE                 | ELGELKCGHDYHVSICDITWLL      | LKNS                            | CPIC              |    |
| Bra017280-H2 | CSICL     | GDIYKGNH                | LLRQLPCNHLFHLKICDITWLL      | NPT                             | CPIC              |    |
| Bra017320-H2 | CAICL     | AEFSDDE                 | TV-RLITVCRHGFHVSICDITWLL    | SHKT                            | CPIC              |    |
| Bra017465-H2 | CVICL     | STLKTGE                 | QVRKL-DCRHVFHVSICDITWLL     | HINFN                           | CPIC              |    |
| Bra017535-H2 | CAICL     | LEFEEEH                 | VLLRLLTTCYHVFHVSICDITWLL    | SNKT                            | CPIC              |    |
| Bra017713-H2 | CAICL     | TEFSDEE                 | EI-RLIPKCSHAFHVSICDITWLT    | SRSS                            | CPIC              |    |
| Bra017732-H2 | CSVCL     | QDFQVGE                 | TVRSLPHCHHMFHLPCIDNWL       | LRHS                            | CPIC              |    |
| Bra017859-H2 | CGICL     | QSAKAGR                 | GTAIFTAECSTHFFHVSICDITWLL   | DLTLLAA                         | CPIC              |    |
| Bra018091-H2 | CLICL     | EEFQIGH                 | EVGRLP-CAHNVHVSICDITWLL     | LNVK                            | CPIC              |    |

Bra018644-H2 CCMCF-----DPVS--IR--GDTVVVFFCCHAYHMTCLMDAFAFSDSNIKTAAKGGSSGYGYDNGVEE-----DTEDEEEDDSNDGDRSGR-SRLRCILC  
Bra018663-H2 CAICL-----DEIVKGDQK-----AIFTAECSSHTFHEDCITNVK-----HGM-KI-----CPLC  
Bra018777-H2 CVICL-----SDFVSGE-----KL-RLLPNCNHGFHVRICIDKWLQ-----QHLT-----CPSC  
Bra018779-H2 CVICL-----SDFVSGE-----KL-RLLPNCNHGFHVRICIDKWLQ-----QHLT-----CPSC  
Bra018780-H2 CVICL-----SDFVSGE-----KL-RLLPNCNHGFHVRICIDKWLQ-----QHLT-----CPKC  
Bra018781-H2 CAICL-----SEFVSEE-----RV-KLLPTCHHGFHVRICIDKWLQ-----SHSS-----CPTC  
Bra019006-H2 CAICL-----SGYVVNE-----ECRVF-FVCRHMVAVCIDAWL-----KNHLT-----CPTC  
Bra019109-H2 CSVCL-----DEFDQGC-----EAKEMP-CRKHFFHRCIVPWL-----ELHSS-----CPVC  
Bra019181-H2 CAICR-----EPMA-----KAKRLHCNHLFHLGCLRSWLDQGL-----NEVYS-----CPTC  
Bra019252-H2 CCVCL-----GEFELKE-----ELVEMPSCKHIFHLDCIHLWL-----YSHTT-----CPLC  
Bra019304-H2 CPICL-----EYETEN-----PRLLTCKRHDHFLACLILEWME-----RSES-----CPVC  
Bra019382-H2 CAVCT-----EVFEAGA-----EGRE--MPCKHIFHGDCIVPWL-----SIRNS-----CPVC  
Bra019499-H2 CVVQ-----MEFEEGE-----SLVVLRNCNHVHSEECITKWLQ-----TKKV-----CPIC  
Bra019672-H2 CPICL-----DEWSEGD-----VAAEMP-CRKHFFHRCIVPWL-----GRQAT-----CPLC  
Bra019673-H2 CGLCNRYIS--QKPPCGRSIVRNQDMPVTG-----VLPQHVFAECL-----DQSTPKAHRN--DPPCPVC  
Bra019769-H2 CGVCKRKI---LTMIGDFRMAQGYSSSGPLAFY-----VFPCGHSHFAQLLHTVTSCAHEEQAEHILDQKQLTLGSETRRDMNGNRSDEPITSTTADKLRSELDDA--IASECFPC  
Bra019784-H2 CCICL-----CAYEDGS-----ELRELP-CGHFFHSCVVDKWLQ-----INAT-----CPLC  
Bra019945-H2 CSICL-----EDLSCG--GGPGVPSRMPFCSHVHFIHRCILKWLQ-----RKST-----CPMC  
Bra020133-H2 CAVCL-----GDLEDGD-----EV-RELRNCSHVHFRHCIDRWLDYECGG-----DNGEGEDNHRT-----CPLC  
Bra020167-H2 -SICL-----EVEFSDS-----PSTLTSCRKHVHQCILEWCO-----RSSQ-----CPMC  
Bra020183-H2 CVICT-----EEMFLA-----EATSMPCSSHVHSSCIKWLQ-----VGNK-----CPLC  
Bra020234-H2 CAICL-----TAMKAGQGH-----AIFTAECSSHTFHFCITNVK-----HGM-QI-----CPVC  
Bra020313-H2 CAVCT-----EVFEAET-----EARE--MPCKHIFHGDCIVPWL-----SIRNS-----CPVC  
Bra020410-H2 CDLCDDRLA--SDPERNASL--RSLQEAC-----VLACGHVHFKCL-----RGTTLLDLDN--PSCILC  
Bra020507-H2 CPICFEYFL--ESRNDVT-----VLPCHHTHOKL-----EEMREHYQYA-----CPLC  
Bra020554-H2 CPDC-----KLPGDCCP-----LIWACNHSFHLHCILKWLQNS-----QTSQ-AH-----CPMC  
Bra020591-H2 CAICL-----NEFEDDE-----TL-RLLPKCDHVFHPCIDAWLK-----SHVT-----CPVC  
Bra021061-H2 CIICL-----SEFKDGD-----TL-RVLDRCRKHGFHVCIDQWFS-----SNRS-----CPTC  
Bra021160-H2 CIICR-----EEMT-----TAKKLCGHLFHVHICIRSWLER-----QQT-----CPTC  
Bra021193-H2 CAVCL-----SEFEEGE-----SG-RVLPCKHAFHVECIDMWFH-----SHST-----CPLC  
Bra021195-H2 CAVCL-----SEFEEGE-----SG-RVLPCKHAFHVECIDMWFH-----SHST-----CPLC  
Bra021196-H2 CPVCL-----SEFEEGE-----SG-RVLPCKHAFHVECIDMWFH-----SHST-----CPLC  
Bra021280-H2 CPICL-----EHLNGG-----LGYIRLRNCMHKPHSFCIDKWLQ-----KCAR-----CPLC  
Bra021354-H2 CSVCL-----CEFOENE-----RL-RLLPECNHAFHVAICIDTWLK-----SHSN-----CPLC  
Bra021404-H2 CSVCL-----SEFEEDD-----QG-RILPKCGHAFHVCIDTWFR-----SRST-----CPLC  
Bra021467-H2 CAVCK-----DEMVLDE-----EVKR--LPCRHLYHGEICITPWL-----GIRNT-----CPVC  
Bra021618-H2 CIVCL-----FDFAIDD-----KV-RQLPNCRHVHFKRCDRWI-----VDCKRIT-----CPIC  
Bra021697-H2 CAICH-----NELGASG-----ELNLTVCNHSVHQCILEGWK-----MNLF-----CPVC  
Bra022125-H2 CGICL-----EELNPRG-----EIVFDMPCSHQPHDLCISRWLR-----RSKI-----CPLC  
Bra022144-H2 CAICL-----SEFEQGE-----SI-QVLEKCHHGPHVCKIHKWLS-----SRSS-----CPTC  
Bra022174-H2 CAVCL-----SEFEEGE-----SG-RVLPCKHAFHVECIDMWFH-----SHST-----CPLC  
Bra022310-H2 CPICCEFLF--TSSEAVR-----ALPCGHYMHSAF-----QAYT--CSHYT-----CPTC  
Bra022354-H2 CVICL-----SDFVAGE-----RI-RLLPNCNHGFHVRICIDKWLQ-----QHLT-----CPKC  
Bra022355-H2 CAICL-----SEFVSGE-----RV-KLLPCHHGFHVRICIDKWLQ-----SHSS-----CPTC  
Bra022370-H2 CAVCL-----LEFEEDD-----YV-RTLPLCFHAFHLECIDEWLR-----SHPN-----CPLC  
Bra022466-H2 CVICR-----LDYEDDD-----DLILLP-CKHSVHSECNWNLK-----INKS-----CPVC  
Bra022498-H2 CIICR-----EEMT-----SARKLVCGHLFHVHICIRSWLER-----QNT-----CPTC  
Bra022630-H2 CSICL-----SEYEPKE-----ILKTIPTPCQHCFHACIDEWLK-----LNGT-----CPVC  
Bra022849-H2 CPICC-----KEFGTEG-----DINSLNCEHSFHHICILDWVK-----KSLT-----CPVC  
Bra023041-H2 CPICL-----GDYKGNH-----LLRQLPDCRHLFHLKCIDTWLRL-----NPT-----CPVC  
Bra023042-H2 CHICL-----GDFKGNH-----MLRQLPDCNHLFHLKCIDTWLRL-----NPT-----CPVC  
Bra023101-H2 CAICL-----EYVVEGE-----ELGELKCGGHDVHGCGIKWLS-----MKNS-----CPIC  
Bra023261-H2 CSICL-----LEFMDDD-----TM-RLISTCNHVFHICIDLWFE-----SHKT-----CPVC  
Bra023539-H2 CAICK-----DEIVVNE-----KVKR--LPCRHLYHKECIVPWL-----GIRNT-----CPVC  
Bra023814-H2 CSAICL-----NEFHVNE-----TV-RVIPHCFHLPFVDCVD--P-----KNVS-----CPLC  
Bra023832-H2 CIVCF-----GNYSQHN-----NLC-ILTCGHSFHFACIDQWI-----RRDIS-----CPIC  
Bra024007-H2 CSIQ-----EYTTIGD-----EVGRHL-CEHAYHLKCVQEWLR-----MKSW-----CPTC  
Bra024009-H2 CSIQ-----EYTTIGD-----EVGRHL-CEHAYHLKCVQEWLR-----MKSW-----CPTC  
Bra024081-H2 CAVCL-----CEFEEDD-----KL-RLLPKCSHAFHVCIDTWLL-----SHST-----CPLC  
Bra024178-H2 CSVCL-----SKFESVE-----IL-RLLPKCRHAFHVCIDQWLE-----EHAT-----CPLC  
Bra024408-H2 CGICL-----QRLNSGQIN--STAIPTAECSSHFHLSCAVLDG-----KR-----CPIC  
Bra024491-H2 CSICL-----QDYQRCF-----IVRILPSCRHMFHLFCIDSWF-----LEHRS-----CPLC  
Bra024512-H2 CAICL-----SDFADGE-----EI-RVLPCLGHSFHVCEIDKWLQ-----SRSS-----CPSC  
Bra024529-H2 CAICL-----EDYSVGE-----KLRVLP-CCHKFHATCVDVWLTS-----WRTF-----CPVC  
Bra024628-H2 CAVCL-----CEFSEDD-----KL-RLLPICSHAFHVCIDTWLL-----SNST-----CPLC  
Bra024853-H2 CCICL-----SSYEDGA-----ELHTLP-CNHFFHFCIVKWLQ-----MKAT-----CPLC  
Bra024902-H2 CIVCL-----STLKTGE-----EVKRL-DCRHVFHFKCLEWQLQ-----HLNFN-----CPLC  
Bra024913-H2 CAICL-----EPLSHCDDNSP--SEATFTGQCSHSHFSCIASNVR-----HGS-VI-----CPVC  
Bra024929-H2 CAICL-----SEFEPEE-----SI-HVLEKCHHGPHVCKIHKWLS-----SHSS-----CPTC  
Bra025008-H2 CAICL-----LEFEEDH-----ILRLTLTCYHVFHQCIDRWLD-----SNKT-----CPVC  
Bra025085-H2 CVICL-----VEYEGD-----TIRTLT-CHHEFHRTCVDRWLKE-----IHRV-----CPLC  
Bra025417-H2 CAICR-----EELTANE-----RLSE--LPCSHCRHDCISNWL-----SNRNT-----CPLC  
Bra025504-H2 CPICL-----EYDMDN-----PKLLAKCEHFFHFLACLILEWME-----RSET-----CPVC  
Bra025597-H2 CAVCL-----CEFTKED-----KL-RLLPTCSHAFHVCIDTWLQ-----SNST-----CPLC  
Bra025698-H2 CSICHEYIF--NNSPVK-----ALPCGHVHSTCF-----QEYT--CFHYT-----CPTC  
Bra025846-H2 CAICL-----TEFSAGD-----EL-RVMPQCGHGFHLSCIDTWLG-----SHSS-----CPSC  
Bra026165-H2 CVVCL-----SELHGED-----EVKRL-ECGHVFHFKFCLEGWLH-----HLHFT-----CPLC  
Bra026337-H2 CVVCL-----FELADGD-----KA-KFLPSCKHWFHARCIDPWLE-----SHAT-----CPIC  
Bra026420-H2 CCICL-----AKYKDKF-----EVRKLP-CSHRFHVKCVDQWLR-----IASS-----CPLC  
Bra026444-H2 CSVCL-----DEFKESG-----EAKEMP-CRKHFFHVCIVPWL-----ELHSS-----CPVC  
Bra026849-H2 CSICL-----EWSSEGD-----VAAEMP-CRKHFFHRCIVPWL-----GRHAT-----CPLC  
Bra026851-H2 CGLCNRYIS--QKSPWGSRSIMNRDMPVTG-----VLPQHVFAECL-----DQSTPKTHGN--DPPCPVC  
Bra026955-H2 CCICL-----SAYEDGT-----ELRELP-CGHFFHSCVVDKWLQ-----INAT-----CPLC  
Bra027034-H2 CAICH-----NELGASG-----DLNLTVCNHSVHQCILEGWK-----MNLF-----CPVC  
Bra027282-H2 CTRICQ-----ENYKNQD-----KIATLD-CRHEVHAECLKWLQ-----IKNI-----CPVC  
Bra027349-H2 CVVCL-----SNLVDGD-----KA-RVMPCTCKHCFHVCIDKWLQ-----CNSI-----CPVC  
Bra027436-H2 CIVCL-----DDFEIGV-----EAKEMP-CRKHFFHSECLLPLW-----ELHSS-----CPVC  
Bra027467-H2 CCICQ-----EYSSEGE-----DMGALC-CGHDFHQCIRKWLQ-----QKNL-----CPIC  
Bra027562-H2 CTRICQ-----EPYRAGD-----AVRTLP-CDHSHFSCIVDQWLIS-----DHGD-----CPLC  
Bra027625-H2 CCICL-----SAYADET-----ELRELP-CGHFFHSCVVDKWLQ-----INAT-----CPLC  
Bra027664-H2 CAVCL-----YDFENDD-----EI-RRLTNCRHIFHKECIDRWI-----MDYSQMT-----CPLC  
Bra027782-H2 CAVCL-----YDFENHD-----EI-RRLTNCRHIFHKECIDRWI-----MDYNQIT-----CPLC  
Bra028004-H2 CSVCL-----GDYQADD-----KLQIPACGHTFHMDCIDLWL-----TSHTS-----CPLC  
Bra028075-H2 CAICL-----NEFDGDE-----EL-RLMPACSHAFHPCIDVWLS-----SRST-----CPVC  
Bra028093-H2 CPVCL-----CEFEADD-----KL-RLLPKCSHAFHVCIDTWLL-----SHST-----CPLC  
Bra028138-H2 CSICL-----EDLSKS-----QOSIEMPNCLHMFHQCILFEWLG-----RKNS-----CPLC  
Bra028140-H2 CSICL-----EDFSVS-----HENIIMWPCQKHVHQCILEFELS-----RQNS-----CPLC  
Bra028173-H2 CIVCM-----EDFVPEG-----EATE--LPCRHLYHKNCTPWL-----RLHNS-----CPIC  
Bra028213-H2 CPTCL-----DDYTPEN-----PKIITRCSHFFHLSCIYEWME-----RSET-----CPVC  
Bra028453-H2 CAVCL-----CEFTERD-----KL-RLLPMSHAFHLCIDTWLQ-----SNST-----CPLC

Bra028464-H2 CAICL EDLLVGS AASTLP-CQHFFHTGCILEWLKN SR-F CPTC  
Bra028731-H2 CSICL ADVKRTD MIRVLPCNHLPHDKCVDLPWLK HPT CPVC  
Bra028866-H2 CVICK EEMGEGR DVCEMP-CQHLFHWKCILPWL SKRNT CPFC  
Bra028915-H2 CAICL GEFADGE KV-RVLPCCNHSFHMSCIDTWLV SHSS CPNC  
Bra028935-H2 CSVCL DEFERGV EAKEMP-CKHKFHWKCIIVPWL ETHSS CPVC  
Bra028950-H2 CCICL AKYKDKE EVRKLPL-CSHKFHLKCVQDQWLR IISG CPLC  
Bra029441-H2 CSICL DNLVSV-DKHGVSTRMTCSHVFEKCLLVWFQ RKNT CPLC  
Bra029442-H2 CSICL DNLVSVGRSNSKRGIPTRMTCSHVFDGCLLEWLQ RKNT CPLC  
Bra029869-H2 CPVCO DRFEMGS SARK-MPCRHIYHSECIVPWL FOHNS CPVC  
Bra030136-H2 CAVCK DAMVMSE IGKK-LPCGHFHDNCILPWL ETRNS CPVC  
Bra030218-H2 CSICS QSVKPGQ GTAIFTAECSSHTFHFPCVTSRAAAA DHNRLVT CPVC  
Bra030408-H2 CSICL EEEYEDDH EIMRLNK-CGHIHFHFCMDSWLA RHRS CPNC  
Bra030712-H2 CAICL DEIRKEDGK AIFTAECSSHSFHDCTISNVK HGN-RI CPLC  
Bra030854-H2 CSVCL DEFELGV EAKEMP-CEHKFHWKCIIVPWL ELHSS CPVC  
Bra030982-H2 CPICW EEFQTEL DINSLSNHTYHHHCISNWVE KTLT CPVC  
Bra030987-H2 CSICL SPFKPED RL-RHLLPLCSHAFHDCISTWLI SNKTU CPLC  
Bra031056-H2 CPICHEYIF TSNPAK ALPCGHVHMSACF QEYT-CSHYT CPIC  
Bra031193-H2 CGACSRPLS QKSLSSQKIFATNELSVAA ILACGHVHSECL EQMTPEADKF-DFQCPVC  
Bra031441-H2 CSACM NEFHVNE TV-RVIPHCFHLPHDPCVD P KNVN CPVC  
Bra031849-H2 CCICL QRVHSDQIN STAIFTAECSSHSFHLSCAVRLQD KR CPFC  
Bra032086-H2 CAICL EDMSEES E-QVLCQPPPECLHMFHEDCTINWLDL HDS CPLC  
Bra032514-H2 CSVCL NEFQEDE KL-RIIPNCCVHFHDCIDLDWLQ GNAN CPLC  
Bra033193-H2 CSVCL GDYQANE KLQIIPPCGHTFHMDCIDLDWL THTT CPLC  
Bra033599-H2 CAACARPLS EKSLWSRQNIFFMTELNSVSA VLACGHVHGDCL EQMPEVDKF-DFSPIC  
Bra033652-H2 CCICQ EETEGD DMGLE-CGHEFHSQCIKEWLK QKNL CPIC  
Bra033680-H2 CSVCL NEFQEEE KL-RIIPHCSHLPHDIDLDWLQ NNAN CPLC  
Bra033777-H2 CLICL EEFHGH EVRGLP-CAHNFHVECIDQWLR LNVT CPFC  
Bra033953-H2 CAICK \* EEFVGE EGKE-LKCLHLVHPSICIVSWL NHTT CPIC  
Bra033963-H2 CCICL SSEDGI ELVTLPL-CNHFFHSTCIVKWLK MNAT CPLC  
Bra034152-H2 CLICL GDFVGE KV-RVLPKCNHGFHDCIDTWLL SRDS CPFC  
Bra034259-H2 CAICL EDLWT N-KQLKPLHCSHQFHFRCISKWLQS RNS CPFC  
Bra034573-H2 CSVCL SEFESEE TL-RLLPKCRHAFHVECIDTWLR SHTN CPVC  
Bra034865-H2 CCICL GLEEGE KMKV-LPLCRHCYHCECVDRLW MTES CPVC  
Bra035010-H2 CPVCL ENIESCO SARLVPGCNHGFHQLCADTWL SHNTV CPVC  
Bra035230-H2 CIVCL SDFESDD DI-RQLPNCRHVFHRCIDLDRI VDCCKVT CPVC  
Bra035284-H2 CSICL DNLVGS SSIHGSATLMNCSHVHRCISLDWLQ QKNT CPFC  
Bra035483-H2 CSICL IDFMDDD TM-RLISTCNHFFHICIDLDWFE SHKT CPVC  
Bra035660-H2 CIVCL EDFEVND VV-RLVGCXHFHVECIDSWC FYKLT CPVC  
Bra035785-H2 CSICL QWEEGQ VGRKLERCGHTFHMKCIDWDF LRQS CPIC  
Bra035835-H2 CAVCM DEFEDGG DVKQVP-CKHVHQCDCMLPWL ELHNS CPVC  
Bra036197-H2 CAICR EKLAPSE RLSE-LPCRHVYHDCISSWL TNRNT CPVC  
Bra036491-H2 CIVCM ATIDLRRR TNDVMVTPCEHFLHSGCQLR WMDKME CPFC  
Bra036631-H2 CAICL NEFEDDE TL-CLLPKCDHVHPHICGAWLE GHVT CPVC  
Bra036816-H2 CSVCL MRMEDED AIKSLP-CSHEFSLCVDVDFDV SRKIC CPVC  
Bra037002-H2 CSVCL SEFESEE ML-RLLPKCRHAFHSLCIDTWLR SHTN CPVC  
Bra037109-H2 CSVCL DDFEVGV EAKQMP-CKHNFHADCLLPWL ELHSS CPVC  
Bra037333-H2 CPICF EDYEADN PKIKTNCEDHFLSLCLEWME KSDG CPIC  
Bra037367-H2 CSICY EDLKPA AENLQSIACGHVHFLCQLQWFEYCPS TNKRN CPIC  
Bra037410-H2 CCICN CPLTKTFS TLRVRFNCGHATHLQCEVS ESETSSSG CPVC  
Bra037561-H2 CAICL SEFVSCE RV-KLLPKCHHGFHRCIDRWLS SHSS CPFC  
Bra037562-H2 CIVCL SDFVAGE QV-RLLPKCNHGFHRCIDRWLK QHT CPFC  
Bra037592-H2 CPICCEFLF TSSETVR ALPCGHVHMSACF QAYT-CSHYT CPIC  
Bra037644-H2 CSICL QDAEAGE KMRR-LTACGCHVFHDCIDPWL EKRSST CPFC  
Bra037800-H2 CAVCK DGMVIGE TVKK-LPCGHCYHNCILPWL GTRNS CPVC  
Bra037999-H2 CCVCL DDFEMGT VCKQMP-CKHIFHSDCLLPWL QHSS CPVC  
Bra038051-H2 CAVCL SEFESEE PG-RVLPNCKHAFHVECIDMWFL SHSS CPVC  
Bra038109-H2 CTRIC ESFKNEE KIATLD-CGHEYHAGCILEKWLV VKNV CPFC  
Bra038199-H2 CAVCL GLEDGD EV-RELRNCSHVHRCIDRWLDYEC DDNDGEDNHT CPVC  
Bra038240-H2 CIVCR LDYEDDD DLILPL-CKHSHSECNINWLK INKI CPVC  
Bra038246-H2 CAVCM DEFEDGG DVKQMP-CKHVHQCDCMLPWL ELHNS CPVC  
Bra038386-H2 CAVCL NEYKEDD ML-RLLPKCGHVFHVCIDWFS YRST CPIC  
Bra038545-H2 CPVCL CEFEAED KL-RLLPKCRHAFHVECIDTWLL SHST CPVC  
Bra038813-H2 CVVCL DGFRRGQ WCRNLPCGCVHFRKCVDTWLL LKAAS CPIC  
Bra039168-H2 CPICL EETSEN PKVITKCSHFFHLCGCIYRWE RSEN CPVC  
Bra039281-H2 CPICL SEYASKE TVRCIPECEHCFFHICIDAWLK LHGS CPVC  
Bra039282-H2 CPICL SEYASKE TIRFMPEDHCFHVECIDVWLK IHGS CPVC  
Bra039287-H2 CPICL CEYKAE MLRMMPECKHYFHLCCLDWLK LNSG CPVC  
Bra039317-H2 CCVCL CEYEDGT ELRELV-CRHHFHEACIDKWLK INAT CPVC  
Bra039318-H2 CCVCL CEYEDGT ELRELV-CRHHFHEACIDKWLK INAT CPVC  
Bra039430-H2 CSICL DTVAKDGD RAWANLQCGHFLHDCIGSAFNA KQVMQ CPNC  
Bra039454-H2 CAICL NEFEDDE TL-RLVPKCDHVHPHICGAWLE AHVT CPVC  
Bra039652-H2 CSICL ESFTNGD MLISLP-CTHSFSSCNPWLRKA CG-D CPVC  
Bra039659-H2 CTRIC ESFKNEE KIATLD-CGHEYHAECLKWLII VKNV CPIC  
Bra039822-H2 CCQQC STFDE-GG GLQVTRGLCLHAHTSCLVS LKSFPPHTAPAG YVCPSC  
Bra039842-H2 CCICQ EEAEGD DLGLE-CGHEFHDCKIKQWVM LKNL CPIC  
Bra040087-H2 CCICL AKYANNE ELRELP-CSHFFHKECVDKWLK INAS CPVC  
Bra040450-H2 CIVCQ LKYKIGE KQMLNP-CKHVHSECSIKWLS INKI CPVC  
Bra040498-H2 CCICL NSVKTGQ GTAKYTAECSSHVHFFPCVTDVVS KHGKLV CPVC  
Bra040540-H2 CSICL ETVTKEGD RAWAKLHCGHEFHLDICGSAFNT KQVMQ CPNC  
Bra040564-H2 CAVCL SHLVDGD KA-RVLPNCGHGFHVCIDMWFL SHST CPVC  
Bra040642-H2 CAICL NEFEDDE TL-RLLPKCDHVHPHICIDAWLE AHVT CPVC  
Bra040855-H2 CPVCL NEFEDDE TL-RLLPQCHVHFHPCIDAWLR SHAT CPVC  
Bra040966-H2 CCICL CEYEDGV ELRELP-CNHFFHCTCDKWLH INSR CPVC  
Bra008196-H2 SSTCSNDLATGSHYASSEGWLSLNTFSELGGVSKGQMMSSVAALVACGHVHAECLVETVTE IEKYDPA CPIC  
Bra002312-H2 CAICL RNHIMDLCECQANQASATSEECTVAVGVCNHFHFCISRWL KTRQV CPIC  
Bra006565-H2 CAIC RNHIMDLCECQANQASATSEECTVAVGVCNHFHFCISRWL KTRQV CPIC  
Bra020111-H2 CAIC RNHIMDLCECQANQASATSEECTVAVGVCNHFHFCISRWL KTRQV CPIC  
Bra006585-H2 CCIR KENLVIG-DRMQE-LP-CKHTFHPCLKRWL DEHNS CPIC  
Bra016327-H2 CAVC LCFESBD-DKLR-LPVCSHAFHDCIDTFFFAAGDDGER EPAENDIR CGKR  
Bra027290-H2 CWIC REFVSDNAPD-DRSQDFKCTQCAHKYHGVCLQRS KRREPPF TYFC  
Bra010204-H2 CSVC LGDYQAD-DKLQ-ILSGGHTFHMDCIDLDWL TSHST CPVC

Figure S2 Multiple sequence alignment of 262 RING-HC domains of *B. rapa*.

Bra000043-HCa CAICFDARR DCFFLPCG-HCVSCY-CQGTKIA EAAGSCPV-C  
Bra000106-HCa CAICLETVFN PYALKCG-HIF-CK-ACACSAASVMIFQG VKAAPQCSKPI-C  
Bra000249-HCa CPVCTNLMY PPINCPNGHTL-CS-SCKQQVN TCFP-C  
Bra000250-HCa CVICMD LSKPEPVNCG-HLY-CW-PCLRYWLEVSVAK ECPV-C

|                |                                   |                    |                        |              |                         |                   |             |
|----------------|-----------------------------------|--------------------|------------------------|--------------|-------------------------|-------------------|-------------|
| Bra000425-HCa  | CPICIEPLS                         | IPIFQCDNGHLA       | CS                     | SCCPKLN      |                         | KCPS              | C           |
| Bra000480a-HCa | CCICFEQV                          | CTIEVKDCG          | HQM                    | CA           | QCTLALCCHNKPNPTTS       | TVTPP             | VCPP        |
| Bra000480b-HCa | CTKQNMIELSEGCA                    | TVQCRCG            | HSF                    | CY           | RCG                     | ANAG              | CCPH        |
| Bra000646-HCa  | CFVLETEPH                         | HSVVLLCSSYHKG      | CRPYMCATGNRFSNCL       | EQYKNAYARDEK |                         | SGKPAELICPL       | C           |
| Bra000729-HCa  | CGICMDIIV                         | DRGLLDCCQ          | HWF                    | CF           | ECIDNWSS                | IMNLICPL          | C           |
| Bra000784-HCa  | CRVCMGRKKGAA                      | FIPCG              | HTF                    | CR           | VCSREVWLNRG             | SCPL              | C           |
| Bra000997-HCa  | CPICLSNPK                         | NMAFCGG            | HQT                    | CC           | ECGPDLK                 | VCPI              | C           |
| Bra001159-HCa  | CGICLSEEDMRR                      | LKGTLDCCS          | HYF                    | CF           | TCIMEWSK                | VESRCPL           | C           |
| Bra001236-HCa  | CCVCQVRIKQAT                      | FTSCG              | HTF                    | CK           | LCSKELMAQKG             | HCPV              | C           |
| Bra001285-HCa  | CSVCLDRVLSKATPGER                 | KFGLLTECH          | HPF                    | CI           | QCIRNWRSSAPVSGMD        | VNSTLRACPI        | C           |
| Bra001477-HCa  | CRSCGKGEA                         | SVLLLPFR           | HMCLCS                 | VCGSS        |                         | VYTCPV            | C           |
| Bra001901-HCa  | CPICNNLYDRA                       | TTISECL            | HTFYCK                 | RCIEDKLVVENL |                         | KACPV             | C           |
| Bra002208-HCa  | CVICLTEPK                         | DTAVMPCR           | HLCLCS                 | DCAKELRFQSN  |                         | KCPI              | C           |
| Bra002699-HCa  | CAVCLERK                          | CTVSADGGC          | HEF                    | CT           | NCALYLSTTNTSSKIT        | SQATPGSVPCPL      | C           |
| Bra003133-HCa  | CVICLTEPR                         | DTTVLPCR           | HMCMS                  | GCALLRFQTN   |                         | LCPI              | C           |
| Bra003180-HCa  | CMLCQSLLF                         | DSTRCVFCT          | HVF                    | CK           | VCLAR                   | FKD               | CPL         |
| Bra003314-HCa  | CNICLD                            | LSKEFVLTCGG        | HLV                    | CW           | FCLFQWLQISEAK           | BCPV              | C           |
| Bra003315-HCa  | CPVCTNLMY                         | PPIHQCPNGHTL       | CS                     | NCKARVQN     |                         | TCPT              | C           |
| Bra003473-HCa  | CPVCTNSMY                         | PPIHQCHNGHTL       | CS                     | TCKNRVHN     |                         | RCPT              | C           |
| Bra003493-HCa  | CAVCAADNLEW                       | VAYGSCG            | HREVCS                 | TCVVRLEFVLD  |                         | FRCCI             | C           |
| Bra003533-HCa  | CPICQVDPATP                       | FIALPCQ            | HRV                    | CY           | YCIIRTCASAAS            | FRCLR             | C           |
| Bra003669-HCa  | CFVLESPEH                         | NAVLLLCSSYHKG      | CRPYMCATSSRFANCLDQYRKS | SYGNSEQ      |                         | AQLICPL           | C           |
| Bra003806-HCa  | CPICWEFFNVFENV                    | PVVLWCG            | HTI                    | CK           | DCLLALHRAVVIKSSGF       | PFHLEFFVCPW       | C           |
| Bra004082a-HCa | CKICRQVMTL                        | FVETPCA            | HNH                    | CK           | ACLEDKFAQTIVRERSRGGRT   | LRAMKNMCKPC       | C           |
| Bra004082b-HCa | CSFCIQLPFR                        | FVITPCG            | HNH                    | CL           | KCFE                    | KWIG              | QKRCIAK     |
| Bra004174-HCa  | CPVCFQALT                         | QHVFCQNGHIA        | CS                     | SCCRELRN     |                         | KCPA              | C           |
| Bra004176-HCa  | CPICLEPLR                         | GPIYQCCHNGHT       | CS                     | FCLPRVYK     |                         | HCPV              | C           |
| Bra004260-HCa  | CPICLVLPK                         | NMAFNCG            | HQT                    | CS           | DCGEDLH                 | VCPI              | C           |
| Bra004339-HCa  | CRVCFEDPI                         | NVLLPCR            | HHVLS                  | TCCEK        |                         | CKKCI             | C           |
| Bra004373-HCa  | CPICFESFNIVENV                    | PVVLWCG            | HTL                    | CQ           | NCVVALQPAVLRSS          | Q                 | DIKVEFFVCPW |
| Bra004401-HCa  | CPVCHALT                          | NPIFQCDNGHIA       | CS                     | SCCTNLRN     |                         | KCPV              | C           |
| Bra004402-HCa  | CPVCHALT                          | RPVFCQNGHIA        | CS                     | SCCTNLRS     |                         | KCPS              | C           |
| Bra004478-HCa  | CAVCAENLEW                        | VAYGFCG            | HREVCS                 | TCVVRLEFVLD  |                         | RRCCI             | C           |
| Bra004666-HCa  | CVVCLD                            | LSKEFVVTCGG        | HLF                    | CW           | SCLYRWLVQSEAK           | BCPV              | C           |
| Bra004829-HCa  | CNICLE                            | KAEDPILTCGG        | HLF                    | CW           | GCYQLPFTYLNK            | BCPV              | C           |
| Bra004879-HCa  | CKANCD                            | RSKEVVITKCF        | HLF                    | CN           | PCVKLIITRQ              | RKCP              | C           |
| Bra005128-HCa  | CAICFDADR                         | DCFFLPCG           | HCVACY                 | QCCKIT       |                         | EAAGSCPI          | C           |
| Bra005251-HCa  | CSICLNWVHD                        | VVTAAPCL           | HNH                    | CN           | GCFS                    | EMRRS             | EARHQHVLCPQ |
| Bra005352-HCa  | CLICMKDEA                         | SVVELPCA           | HQVVEA                 | SCSESEFM     |                         | GGDKATPC          | C           |
| Bra005381-HCa  | CCVCNASQD                         | ETLLYRCG           | HMCTCL                 | RCANELQCNGG  |                         | KCPI              | C           |
| Bra005541-HCa  | CPICMQVIVD                        | AFLTACG            | HSF                    | CY           | MCIITHLRN               | K                 | SDCPC       |
| Bra005682-HCa  | CGICLEIRNK                        | VVLPTCN            | HSM                    | CI           | NCYRDWRGRSQS            |                   | CPF         |
| Bra005685-HCa  | CAICFDADR                         | DCFFLPCG           | HCVACY                 | QCCKIT       |                         | ETSGF             | CPV         |
| Bra006081-HCa  | CAICQEKMH                         | TPILLRCK           | HMF                    | CE           | DCVSEWER                | ER                | TCPL        |
| Bra006112b-HCa | CEHALFESATG                       | TGSSYDVSLCS        | HSF                    | CW           | NCTQDAHRPVDCCRVSQWIRKNS | VEAENTKWLIDNSKCPK | C           |
| Bra006205-HCa  | CSVCHTRYNED                       | ERVPLLLQCG         | HGF                    | CK           | DCLSKMFSSSS             | DTSL              | ACPR        |
| Bra006253-HCa  | CPICLSSPK                         | DMAFG              | CG                     | HQT          | CC                      | ECGPDLE           | MCPI        |
| Bra006505-HCa  | CAICLNAIFLQ                       | ETAMVKGCE          | HTY                    | CV           | TCILRWASCKESPT          | CPQ               | C           |
| Bra006634-HCa  | CPICLEAFED                        | AVLTPCA            | HRV                    | CR           | ECLLASWRNSSS            | GLCPV             | C           |
| Bra006745-HCa  | CGICMEMNSL                        | AVLPNCT            | HSL                    | CI           | KCYRDWRGRSQS            |                   | CPF         |
| Bra007068-HCa  | CMLCQALLY                         | DSSRCVPT           | HVF                    | CK           | VCVAR                   | FKD               | CPL         |
| Bra007376-HCa  | CPVCTNLMY                         | PPIHQCPNGHTL       | CS                     | NCKARVQN     |                         | TCPT              | C           |
| Bra007725-HCa  | CVICLDRKC                         | DAVLELQCG          | HMCCLC                 | TCSLSLELQK   |                         | RCP               | C           |
| Bra007810a-HCa | CGICLQVMNF                        | FVETPCA            | HNH                    | CK           | GCLEDKFAQTIVRERSRGGRT   | LRAMKNMCKPC       | C           |
| Bra007810b-HCa | CSFCIQLLER                        | FVITPCG            | HNH                    | CL           | KCFV                    | KWTE              | QKRCIAK     |
| Bra008335-HCa  | CSVLESPEH                         | NAVLLLCSSYHKG      | CRPYMCATSTRFANCLDQYRKS | HSGSEQ       |                         | LPILICPL          | C           |
| Bra008536-HCa  | CSICRN                            | PFLNFPVVTNCN       | HYF                    | CN           | LCALM                   | HHEKNT            | NCV         |
| Bra008758-HCa  | CPICLSNPK                         | DMAFCGG            | HQT                    | CC           | ECGPDLO                 | MCPI              | C           |
| Bra008900-HCa  | CAICLDITFLQ                       | ETAMVKGCE          | HAY                    | CV           | TCILRWASYKEIHT          | CPQ               | C           |
| Bra009089-HCa  | CPICISPPRD                        | IIITRCA            | HIF                    | CR           | SCILQTLQRTKP            |                   | SCPL        |
| Bra009278-HCa  | CAVCLERT                          | CTVAEGCE           | HQL                    | CV           | RCALYLCSSSNVPSVT        | VDPGSI            | PCPL        |
| Bra009452-HCa  | CVCCDNIH                          | DALLYRCG           | HMCCTS                 | CCANELVRNGG  |                         | KCP               | C           |
| Bra009546-HCa  | CVICLSEPR                         | DVLVLPFR           | HMCMV                  | GCANELRFQTN  |                         | LCPV              | C           |
| Bra009629-HCa  | CVRCDFPIA                         | IYGRINPCD          | HAF                    | CL           | ECAR                    | SDSICYL           | C           |
| Bra010392-HCa  | CPICNTNSMY                        | PPIHQCHNGHTL       | CS                     | TCKNRVHN     |                         | RCPT              | C           |
| Bra010403-HCa  | CNICLD                            | TAHDPVVTLCCG       | HLF                    | CW           | FCYKWLHVKLSFVSDHHH      | NTCPV             | C           |
| Bra010714-HCa  | KNVCFESPT                         | AAIPLPCR           | HFLCLC                 | SCSLA        |                         | CSECI             | PCPL        |
| Bra010963-HCa  | CGICLEPCIK                        | MVLNCC             | HAM                    | CI           | KCYRNWTKSES             |                   | CPF         |
| Bra011479-HCa  | CPICFGSFTV                        | PCRGDCG            | HWF                    | CG           | SCILQYWN                | YAAVSR            | CKCFM       |
| Bra011582-HCa  | CLNCGSDGET                        | RVLELPCR           | HLCCT                  | ECEAG        |                         | LWVPI             | C           |
| Bra011923-HCa  | CCICFEQA                          | CTIEVKDCG          | HQM                    | CA           | QCTLALCCHNKPNPTTS       | TVTPP             | VCPP        |
| Bra011996b-HCa | CGKQNMIELSQG                      | CIRIKRCG           | HEF                    | CY           | QCGAE                   | ARRCPH            | G           |
| Bra012331-HCa  | CSICHGNFSA                        | PCQANCS            | HWF                    | CG           | NCIMLVWR                | HGSTLR            | CKKPL       |
| Bra012354-HCa  | CPICCEPLK                         | IPIFQCDNGHLA       | CS                     | QCCEKVKK     |                         | ICPS              | C           |
| Bra012512-HCa  | CGICLEPCIK                        | MVLNCC             | HAM                    | CI           | KCYRNWTKSES             |                   | CPF         |
| Bra012532-HCa  | CKRGEREA                          | SVLVLPFR           | HLCCT                  | VCGSA        | L                       | LQCPV             | C           |
| Bra012650-HCa  | CSICRRNSA                         | TVMALPCR           | HVLCK                  | CGDGGD       |                         | VRVPI             | C           |
| Bra013017-HCa  | CKICLIKEV                         | DITIVPCG           | H                      | VLCR         | ECSA                    | SVARCP            | C           |
| Bra013241a-HCa | CCVLELLEYK                        | PVLSG              | HLS                    | CF           | WCVHKSMELE              | SHCP              | C           |
| Bra013241b-HCa | CSACKELLVR                        | PVVLNCG            | HVY                    | CE           | GCVDMF                  | QEGEK             | IKQE        |
| Bra013423-HCa  | CKRGEREA                          | SVLVLPFR           | HLCCT                  | VCGSA        | L                       | LRTCPV            | C           |
| Bra013447-HCa  | CCVCEMPV                          | ESLLYRCG           | HMCCT                  | KCAHELOWSSK  |                         | KCPI              | C           |
| Bra013499-HCa  | CADCHLAIKLVSKVYEREIVVRDRSRFHFKDGS | CQDYCLSLFSDAASLSCN | HV                     | FCN          | ECIVKSMKV               | DATCPV            | C           |
| Bra013775-HCa  | CVICFEERR                         | NCFFVPCG           | HSATCR                 | GCAEKIMS     |                         | EENKVCPI          | C           |
| Bra014051-HCa  | CRFCGVREV                         | CMLLPCK            | HMCLCK                 | ECERK        |                         | LSSCP             | C           |
| Bra014247-HCa  | CVICEDASS                         | EAAVCVPCG          | HVAGCV                 | SCLEIK       |                         | NKR               | CPI         |
| Bra014421-HCa  | CPVCTNSMY                         | PPIHQCPNGHTL       | CS                     | TCKNRVHN     |                         | RCPT              | C           |
| Bra014589-HCa  | CPVCTNLMY                         | PPIHQCPNGHTL       | CS                     | NCKARVQN     |                         | TCPT              | C           |
| Bra014591-HCa  | CNICLD                            | VSKEFVLTCGG        | HLV                    | CW           | LCLFQWLNISEAK           | BCPV              | C           |
| Bra014932-HCa  | CLICMDAPS                         | DGICVPCG           | HVAGCM                 | SCLTQIK      |                         | SHASECI           | C           |
| Bra014934-HCa  | CSICLDAPS                         | EAVCVPCG           | HVAGCM                 | SCLEIK       |                         | AKWGPCV           | C           |
| Bra015086a-HCa | CCVLELLEYK                        | PVLSG              | HLS                    | CF           | WCVHRSMSGLRV            | SHCP              | C           |
| Bra015086b-HCa | CSACKELLVR                        | PVVLNCG            | HVY                    | CE           | GCVDMMDQSEK             | IKKE              | C           |
| Bra015092-HCa  | CCVCMVRSGAA                       | FIPCG              | HTF                    | CR           | LCSRELWVQRG             | NCPL              | C           |
| Bra015262-HCa  | CPICLGIIIRKT                      | RTFMELC            | HRF                    | CO           | ECIDKSMRFGN             | HECPA             | C           |
| Bra015389-HCa  | CGLCHESAED                        | SVVTS              | HVF                    | CK           | ACLIDFSASLKG            | VSCPT             | C           |
| Bra015392-HCa  | CGLCHESAED                        | NVVTSCA            | HVF                    | CK           | ACLIDFSASLRK            | VSCPT             | C           |
| Bra015877-HCa  | CNICLE                            | MAREPIVTLCCG       | HLF                    | CW           | PCLYKWIHFHSQSK          | HCPV              | C           |
| Bra015952-HCa  | CRICFEREI                         | SVLLPCR            | HRVLCR                 | NCSEK        |                         | CKKCP             | C           |
| Bra016082-HCa  | CSICHSHFTA                        | PCQANCS            | HWF                    | CG           | NCIMLVWR                | HGSTLP            | CKKPL       |

|                |                       |              |        |             |                           |                         |             |   |
|----------------|-----------------------|--------------|--------|-------------|---------------------------|-------------------------|-------------|---|
| Bra016385-Hca  | CCVCLERVLKPTPAER      | KFGILTECD    | HAF    | CI          | GCIRNWRSSSPSTCMD          | VNSTLRACPI              | C           |   |
| Bra016557-Hca  | CRVCFEREI             | SLVLLPCR     | HRVLCR | ICSDK       |                           | CKKCPA                  | C           |   |
| Bra016898-Hca  | CLACTNLMY             | PPIFQCPNGHTL | CS     | TCKLKVHN    |                           | TCPT                    | C           |   |
| Bra017091-Hca  | CPICLENLTHR           | RAAVIPSCR    | HGY    | CL          | GCIRKWSGLKRS              | CPL                     | C           |   |
| Bra017094-Hca  | CAICLETVFN            | PYALKCG      | HIY    | CK          | ACACSSASVMIFQG            | VKAAPQCSKPI             | C           |   |
| Bra017511-Hca  | CRICRRRAA             | TVLALPCR     | HLVLCK | GCDG        | S                         | VRVCP                   | C           |   |
| Bra017614-Hca  | CPICFSSFTV            | PCRGNG       | HWY    | CG          | SCILQYWN                  | YAAVSKPKCPM             | C           |   |
| Bra017691-Hca  | CLNCGLNGET            | RVLFPCR      | HLCCCT | GCEGD       |                           | LVLCPI                  | C           |   |
| Bra017935-Hca  | CPVCLQSYDGESTL        | FRVLSGC      | HTA    | CE          | ECLTNI                    | PKKFPDIRCPA             | C           |   |
| Bra018162-Hca  | CGICMEMNSM            | VVLPNCT      | HSL    | CI          | KCYRDWHGRSES              | CPF                     | C           |   |
| Bra018221-Hca  | CEYALELH-EDLLEDDDLDFG | VVCLCG       | HTF    | CF          | SCITLESHPVTCNDASVWFS      | STLD-TLKSNAWLLLENTRKCPN | C           |   |
| Bra018266-Hca  | CPICCVPLT             | SNIFQCDNGHIA | CP     | TCCNKLNR    |                           | KCPS                    | C           |   |
| Bra018428-Hca  | CKMCHGKEV             | SVLVVPCR     | HLSLCK | ECDF        | F                         | TGFCPV                  | C           |   |
| Bra018847-Hca  | CRACND                | PPEAPVITLGG  | HIF    | CY          | QCVSEYITGDE               | NSCPV                   | C           |   |
| Bra019048-Hca  | CNICLD                | TALDPVVTLGG  | HLF    | CW          | FCIYKWLHVQLSSSLSTDHHR     | NNCPV                   | C           |   |
| Bra019242-Hca  | CVICFEERR             | NCFVFLCG     | HSATCK | GALRIMS     |                           | EENKVCPI                | C           |   |
| Bra019391-Hca  | CCVCMGRRGAA           | FIPCG        | HTF    | CR          | VCSREIWMNRG               | SCPL                    | C           |   |
| Bra019817-Hca  | CGICLETCTK            | MVLPNCC      | HSM    | CI          | KCYRNWNLKSQS              | CPF                     | C           |   |
| Bra019910-Hca  | CRMCNAREV             | SVLVVPCR     | HLSLCK | ECDF        | F                         | TGVCVP                  | C           |   |
| Bra020414-Hca  | CAVCLERK              | CTVAADCGG    | HEF    | CT          | NCALYLSTTNTSSKT           | SQATPGSGVPCPL           | C           |   |
| Bra020415-Hca  | CAVCLERKTVAA          | DCCG         | HEF    | CT          | NWELYLSTTNTSSKT           | PQATPGSDPCPL            | C           |   |
| Bra020415-Hca  | CAVCLERK              | CTVAADCGG    | HEF    | CT          | NWELYLSTTNTSSKT           | PQATPGSDPCPL            | C           |   |
| Bra020684-Hca  | CPICMCFPTE            | EMSTKCG      | HIF    | CK          | GCIMK                     | AISKQKCP                | C           |   |
| Bra020773-Hca  | CVICMTEAK             | DTAVLPCR     | HLCMCS | CAKELRLQSN  |                           | KCPI                    | C           |   |
| Bra020883-Hca  | CPICLSLFN             | SAVSLCN      | HVF    | CN          | ACIVK                     | SMKVDPATCPV             | C           |   |
| Bra021742b-Hca | CFRCRRIE              | KNQGCN       | HM     | TCSA        | PCR                       | FQFCWI                  | C           |   |
| Bra021889-Hca  | CPVCLGLIKPNA          | VIKVLPNCK    | HMF    | YE          | ECIARWL                   | ESHHTCPV                | C           |   |
| Bra022858-Hca  | CPVCHALT              | NPIFQCDNGHIA | CS     | ACCINMRN    |                           | KCPS                    | C           |   |
| Bra023148-Hca  | CGVCD-ETQV            | EAVLYMCG     | HMCCTL | KCANELHWSGG |                           | KCPI                    | C           |   |
| Bra023274-Hca  | CLICMGNEV             | SVVFLPCA     | HQVVCG | SCSDNFFSSNN |                           | GGGGVTCPC               | C           |   |
| Bra023282-Hca  | CKGRTREA              | TVVMLPCR     | HLSCIP | ECDR        | T                         | ALACPL                  | C           |   |
| Bra023465-Hca  | CPICLSNPK             | DMAFG        | CG     | HQT         | CC                        | ECGFDLQ                 | C           |   |
| Bra024213-Hca  | CNICLD                | QVRDPVVTLGG  | HLF    | CW          | FCIYKWTHTNNTNRQVRVDQYDKKE | SSKCPV                  | C           |   |
| Bra024254-Hca  | CPICLTKPK             | DMAFS        | CG     | HTT         | CK                        | ECGVVVK                 | TCPM        | C |
| Bra024967-Hca  | CRICWRRSA             | TVLALPCR     | HLILCK | GCDG        | S                         | VRVCP                   | C           |   |
| Bra025434-Hca  | CPICYELPT             | VPIFQCDNGHIA | CS     | SCCPKLSN    |                           | KCHA                    | C           |   |
| Bra025676-Hca  | CTVCLKLLY             | EPATPCG      | HTF    | CR          | SCLFQ                     | SMDRGNKCP               | C           |   |
| Bra025727-Hca  | CNICFD                | LAQDPVITLGG  | HLF    | CW          | FCIYKWLHLHSTSS            | ECPV                    | C           |   |
| Bra026271-Hca  | CNICLD                | QVRDPVVTLGG  | HLF    | CW          | FCIYKWTYSTNNTRRRVDQYDKKE  | SEKCPV                  | C           |   |
| Bra026301-Hca  | CPVCTCSMY             | PPIHQCHNGHTL | CS     | TCKVRVHN    |                           | RCPT                    | C           |   |
| Bra026346-Hca  | CNICLD                | TAHDPVVTLGG  | HLF    | CW          | FCIYKWLHVQLTSVSDQH        | SNCPV                   | C           |   |
| Bra026920-Hca  | CGICLETCTK            | MVLPNCC      | HSM    | CI          | KCYRNWNLKSQS              | CPF                     | C           |   |
| Bra027538-Hca  | CPICLGLIKKT           | RTVMACL      | HRF    | CR          | ECIDKSMRLGN               | KECPA                   | C           |   |
| Bra027588-Hca  | CKRGGERTA             | SVLVVPCR     | HLCLCT | VCGSA       | L                         | LQACP                   | C           |   |
| Bra027667-Hca  | CVICLEHNY             | NAVFVPCG     | HMCCT  | AC          | SSHLS                     | CPL                     | C           |   |
| Bra028153-Hca  | CPICFEAFT             | IPIFQCDNGHIA | CS     | SCCPKISN    |                           | KCPT                    | C           |   |
| Bra028364-Hca  | CKRGGERTA             | SVLVVPCR     | HLCLCT | VCGSA       | L                         | LQSCP                   | C           |   |
| Bra028395-Hca  | CPICCEPLK             | APIFQCDNGHIA | CS     | VCCTKVRN    |                           | ICPS                    | C           |   |
| Bra028419-Hca  | CVICVDASA             | EVAFCVCG     | HVAGCI | SCILKEIK    |                           | NKKLGCPI                | C           |   |
| Bra028646-Hca  | CPVCDYAIKRHDEVPSEDF   | DVVCLCG      | HIF    | CV          | SCQLESHPVTCNNASFVNLN      | ELLYKSRNLARTAKRIKHCP    | C           |   |
| Bra028846-Hca  | CPVLSLELR             | DTIVLPCR     | HMCMS  | GCAKALRFQKN |                           | ECPV                    | C           |   |
| Bra029623-Hca  | CCVCHVIRKAT           | FAPCG        | HTF    | CK          | LCSKELMAQKG               | HCPV                    | C           |   |
| Bra029631-Hca  | CPICMCFPTE            | EVSTKCG      | HIF    | CK          | KCIKL                     | AVSVQAKCP               | C           |   |
| Bra029788-Hca  | CVICLSERP             | DTIVLPCR     | HMCMS  | GCAKVLRFQTN |                           | RCPI                    | C           |   |
| Bra029846-Hca  | CCVCDTDI              | DALLYRCG     | HMCCT  | NCGNELVRTGG |                           | KCPL                    | C           |   |
| Bra030604-Hca  | CGLCHPEAED            | NVVTSC       | HVF    | CK          | ACLIDFAASLGE              | VSCPT                   | C           |   |
| Bra030874-Hca  | CGVCFD                | RPKEVVMKCF   | HLF    | CK          | QCIRSLLEIRH               | RKCPG                   | C           |   |
| Bra030900-Hca  | CVICVTRRR             | IPAFIPCG     | HVVCCR | YCALTVER    |                           | GLNPKCP                 | C           |   |
| Bra031030-Hca  | CRVCFEREI             | SLVLLPCR     | HRVLCR | ICSDK       |                           | CTKCP                   | C           |   |
| Bra031038-Hca  | CTVCLKLLY             | DPATPCG      | HTF    | CR          | SCLFQ                     | SMDRGNKCP               | C           |   |
| Bra031184-Hca  | CKVCFESPT             | ATILLPCR     | HFCLCK | CSSLA       |                           | CSECP                   | C           |   |
| Bra031225-Hca  | CCICYAGDAN            | AVLVPCS      | IRS    | CY          | GCI-TRHL                  | LNCQR                   | C           |   |
| Bra031418-Hca  | CPSCVKILTNTM          | SIVALSSCG    | HVF    | CK          | KCGEK                     | FMPVDKVLV               | C           |   |
| Bra031420-Hca  | CPSCVKILTNTM          | SIVALSSCG    | HVF    | CK          | KCGEK                     | FMPVDKVLV               | C           |   |
| Bra031495-Hca  | CKSNVKEV              | SVLVVPCR     | HLSLCK | DCDV        | F                         | TGFCPV                  | C           |   |
| Bra031942-Hca  | CPICLTPNK             | DMAFCG       | HTT    | CK          | ECGVVVK                   | ICPM                    | C           |   |
| Bra032048-Hca  | CPICFHLPT             | IPIFQCDNGHIV | CS     | TCCEKLSQ    |                           | KCAT                    | C           |   |
| Bra032145-Hca  | CNICFE                | LAQDPVITLGG  | HLF    | CW          | FCIYKWLHHSHSQ             | ECPV                    | C           |   |
| Bra032532-Hca  | CPCLKLLN              | QVLLP        | CD     | HIF         | CD                        | SCIHE                   | SSQVESGCPV  | C |
| Bra032581-Hca  | CSICLDTVFD            | PISLTCG      | HIY    | CY          | MCACSAASVNVVDG            | LKAADPSEKCP             | C           |   |
| Bra032793-Hca  | CPICLVRTK             | NMAFNCG      | HQT    | CD          | ECGEAIQ                   | TCPI                    | C           |   |
| Bra032944-Hca  | CPICLEYPLC            | PQITSCG      | HIF    | CF          | PCVLQYLLIGEDNHKAECF       | KRCPL                   | C           |   |
| Bra033002-Hca  | CAICLETICR            | PSTTTCG      | HSF    | CK          | KLRSAAD                   | KCG                     | RKCPK       | C |
| Bra033065-Hca  | CFWCKSML              | LWANFP       | PCR    | HKLWCS      | SCKHK                     | IAESAGDHRKCV            | C           |   |
| Bra033093-Hca  | CPICWESFNIVENV        | PVVLWCG      | HTM    | CK          | NCILGLQWAIVKLPT           | H                       | FVQLEFISCPW | C |
| Bra033268-Hca  | CPICRE                | SFVDPVVTKCK  | HYF    | CE          | HALK                      | HHTKNK                  | KCFV        | C |
| Bra033353-Hca  | CSICLDTVFD            | PISLTCG      | HIY    | CY          | MCACSAASVNVVDG            | LKTADPSEKCP             | C           |   |
| Bra033393-Hca  | CVMCLSEEM             | SVIFLPCA     | HQVLCF | TCNQLHE     |                           | KEGMKDCPS               | C           |   |
| Bra033597-Hca  | CKVCFESPT             | AAFLPPCR     | HFCLCK | SCSLA       |                           | CSECP                   | C           |   |
| Bra033682-Hca  | CPICLESADD            | PILTPCA      | HRM    | CR          | ECLTTSWRSTSC              | GLCPI                   | C           |   |
| Bra033732-Hca  | CPICLGLIKKT           | RTVMACL      | HRF    | CR          | ECIDKSMRLGN               | NECPA                   | C           |   |
| Bra033848-Hca  | CPICLTIKRD            | VAFCCG       | LMI    | CR          | DGCSR                     | ISNCP                   | C           |   |
| Bra034017-Hca  | CVICWTGFS             | STRGILPCG    | HRF    | CY          | SCIQQVDRLV                | ERKTTCP                 | C           |   |
| Bra034086-Hca  | CVICLSEPS             | DTIVLPCR     | HMCMS  | GCAKVLRFQTN |                           | RCPI                    | C           |   |
| Bra034121-Hca  | CVICDADI              | DALLYRCG     | HMCCT  | NCGNELVRTGG |                           | KCPL                    | C           |   |
| Bra034212-Hca  | CNICLD                | SVQEPVVTLGG  | HLF    | CW          | FCIHKWLHVQTEDEHQHQHK      | QCPV                    | C           |   |
| Bra034501-Hca  | CCVCMGREKGA           | FIPCG        | HTY    | CR          | VCSREIWMNRG               | SCPL                    | C           |   |
| Bra034718-Hca  | CRGCGKEA              | SVLLEPCR     | HMCCT  | VCGSS       |                           | VNTCPV                  | C           |   |
| Bra035092-Hca  | CRSGESES              | CVLVVPCR     | HLCLCG | VCGSS       |                           | VHTCPI                  | C           |   |
| Bra035112-Hca  | CPICLTIK              | DVAFCG       | HMT    | CG          | ECGSRIS                   | NCPI                    | C           |   |
| Bra035664-Hca  | CCICFEQV              | CTIEVKDCCG   | HQM    | CA          | QTLALCCHKNPNTLTS          | TVNPP                   | VCP         | C |
| Bra036164-Hca  | CPICMCFPTE            | EMSTKCG      | HIF    | CK          | GCIMK                     | AISRQKCP                | C           |   |
| Bra036227-Hca  | CVMCLSEEM             | SVIFLPCA     | HQVLCF | TCNQLHE     |                           | KEAMDDCPS               | C           |   |
| Bra036439-Hca  | CPICEL                | PFLDPVVITCD  | HYF    | CN          | LCARK                     | HHKDP                   | TCFV        | C |
| Bra037471-Hca  | CPICMCFPTE            | ETSTKCG      | HIF    | CK          | GCIMK                     | AISRQKCP                | C           |   |
| Bra037967-Hca  | CVICVTRRR             | VPAFIPCG     | HVVCCR | QCASTVER    |                           | EVNPKCP                 | C           |   |
| Bra038276-Hca  | CEYALELH-EDLLEDDDLDFG | VVCLCG       | HTF    | CF          | SCITLESHPVTCNKREASVWSS    | STLD-TLKSNAWLLLENTRKCPN | C           |   |
| Bra038348-Hca  | CKVCFENPV             | NVLLPCR      | HYVLCF | TCKCK       |                           | CKT                     | CPI         | C |
| Bra038415-Hca  | CCVCLERVLKPTPAER      | KFGLLTECD    | HAF    | CI          | GCIRNWRSSSPSTCMD          | VNSTLRACPI              | C           |   |
| Bra038515a-Hca | CQICRKMSS             | PVTTPCA      | HNF    | CK          | ECLTGKFAGITQVRQSRSGRT     | LRAQKVMKCP              | C           |   |

Bra038515b-HCa CSICLQLPER PVVTPCG HNF CL KCFQ KKWAG KRKPTCGT C

Bra038659-HCa CPGCSYPIEFHKGTDA EEEYGLNVVCLCG HNF CC RCSLETHRPVTCNNASDWLSRDLOKLEASDKLSFLWIEDNTEETCPH C

Bra039105-HCa CPICLSNPK NMAFGCG HQT CC ECGPGLK VCPY C

Bra039354-HCa CRSCGKGEA SVLLLPFR HMCLCS VCGSS INTCPY C

Bra039449-HCa CPICLGPIL QESYLDTCF HKF CF RCIKQWIKVSSKVK PLSSVKPL C

Bra039533-HCa CRRCGERA SVLVLPFR HMLCT VCGSA L LQACPV C

Bra039871-HCa CVCDETFV EAVLYRCG HMTCL KCANELHWSGG KCPY C

Bra040048-HCa CSCVLDRLVLSKATPGER KFGLLTECH HPF CI QCIRNWRSSAPVSGMD VNSTRACPI C

Bra040255-HCa CRFCGVGV CMLLLPCK HMLCK ECERN LSSCPL C

Bra040332-HCa CKACND RSKEVVITKCF HLF CN FCVLKITCTRQ RKCPY C

Bra040362-HCa CCVCQVNIKAT FTFCG HMF CK LSKELSAQKG HCPY C

Bra040424-HCa CVVLERKC DAAFVPCG HMCCCL TC ALKLLGK PCPL C

Bra000504a-HCb CSICIDNNS AIQMFSDVDCG HRF CS ECVKRYIEAKLLGNR LKCPHDCG C

Bra001543-HCb CMICMDEKSP SDIFRGTSTCT HYY CT ECTVRYVMTKIEGNIA MIKCPDVC C

Bra001771-HCb CNICND PEPNVVTLCCG HRF CY QCVSEHNGDE NVCPVRC C

Bra001960-HCb CDICVEDE GHHMTRMDCG HCF CN NCWAAHFTVKINEGQ SK RIRCMAYK C

Bra002501a-HCb CLICFNID PERMFSIGKCS HRF CF QCVKHVEVKLLHGM I PNCPHDK C

Bra002501b-HCb CGKQHMIELSQGCN HITRCG HEF CY NCGGG WNKGKGTGCVKQ C

Bra002502a-HCb CLICFNID PERMFSIGKCS HRF CF QCVKHVEVKLLHGM I PNCPHDK C

Bra002502b-HCb CGKQHMIELSQGCN HITRCG HEF CY NCGGG WNKGKGTGCAKQ C

Bra005642-HCb CGICFESYL RKEIATVSCG HPY CK TCWTSYITEKINNGPGCL MIKCPHDCG C

Bra006057-HCb CPICLCEVDG YSLEGCS HLF CK ACILLEQLEASMRNF D AFFILCSHTDC C

Bra006112a-HCb CGICFDYFC RIDIIVMCG HAF CS TCWTSYISIAINDGPGCL MQKCPHDCG C

Bra006671-HCb CLICYNET IERMFSAKCR HRF CF HCSKHVEVKLLHGM I PNCPHDK C

Bra007078-HCb CPACYAHVSP RHKLEVSGCF HRI CF TCIRDCVSSQLARGD TLLCPVPC C

Bra007801-HCb CAICLETD AGRMFSTBQCL HRF CF SCVKQYVEVKLLSGIV FTLCEGG C

Bra009038-HCb CPICLSEVDG YSLEGCS HLF CK ACILLEQLEASMRNF D AFFILCSHTDC C

Bra010152-HCb CCICFSESAG FDFVKLCEP HFF CV CKMKTYYDIHVSEGTVN KLQCPHDCG C

Bra011524-HCb CDVLEDDV AEQ MKRMDCG HCF CN DCWTEHFTVQINEGQ SK RIRCMAYK C

Bra011996-HCb CAICLDEDLN ADMFSDVDCG HRF CS ECVKRIEVLKLEGGF VRCPPHRC C

Bra012536-HCb CSICCEDRR AEMMLTLKCT HKS CS YCMKTYVQGRVESSEV PIRCPVQC C

Bra013417-HCb CSICCEDRL SEMMLTLKCT HRF CS YCMKTYVEGKVNSEV PIRCPVQC C

Bra014815-HCb CRKGEWCR LPVITPCR HLL CL DCVS LDSECTFPDC C

Bra015067-HCb CGICFDTFN AEQMFVASCG HEF CV ECVKRHIEVRVEGDDVH ITRCPY YIC C

Bra015460-HCb CGICFKLLSL ERSASVSCG HRV CK FCWRSHINKSINKIADVDWYG TLKCPYDC C

Bra015463-HCb CGICFEFFQ REEVVSLACG HRF CS TCWTSYITINDGPGCL MLKCPHDCG C

Bra018584-HCb CPACYTVRSH PHKLEVRSGCF HLI CF TCIRDCVSSQLARGD TVLCPYPC C

Bra020455a-HCb CIICLDDVD SDLMFYVERCG HRF CI NCVKQHINVKLVGDKI PNCPHDCG C

Bra020457-HCb CRICLDDVD SDLMFYVERCG HRF CI NCVKQHINVKLVGDKI PNCPHDCG C

Bra021726-HCb CGICFDYFP FEKIASVSCG HPF CT TCWTSYITINDGPGCL MLRCPDPC C

Bra021742a-HCb CGICFESYF QKDIATVSCG HPY CM TCWNGYITAKITGGPGCL MVCPHDCG C

Bra022479-HCb CGICFEYTL SDKLHAAACG HRF CD SCWEGYISTAINDPG C CLMLR C

Bra022845-HCb CGICFDSPY PEKFSVSCG HPF CT TCWTSYITINDGPGCL MLRCPDPC C

Bra022865a-HCb CGICFDSYT QKEVTLSCG HPY CN VCWTSYITINDGPG C CLTVK C

Bra023338-HCb CGICDFKFR RKKIVEVSCG HRF CS TCWNGYITINDGSGCL MQKCPHDCG C

Bra026648a-HCb CAICLDDVN ADMFTVVKCG HRF CS ECVKRHIEVRLEGGV MTCPPHRC C

Bra026648b-HCb CGKQHMIEL SKGCVLVVRCG HRF CF RCGANARSCHTGLGHMFPQPQ ELESPPAPPCWAQ C

Bra027352-HCb CMICMDEKPS SDFRGSVCT HAY CT QCTIRYVASKIKENSA RIKCPDVC C

Bra029725-HCb CMICMDEKSP SDFRGNCT HSY CT ECTVRYVETKIGENVA GIKCPDVC C

Bra031452-HCb CNICND SPEDAVVSCG HRF CK QCFYECTGDD NLCPIAN C

Bra033024-HCb CDICMEDDL PSHAMTGMCCG HSF CN DCWKEHFTIKINEGQ SK RIRCMAYK C

Bra034292-HCb CGICFDDLE AHQMFVALCC HRF CF ECVRRYINVLMEGRA FCCPHFC C

Bra035824-HCb CNICDD PEPNVVTLCCG HRF CY QCVSEHNGDE NVCPVRC C

Bra037371-HCb CPACYAHVSP RHKLEVRSGCF HRI CF TCIRDCVSSQLARGD SVLCPYPC C

Bra037375-HCb CVICYEGIT DTKFTV SCGF HRI CF ECMRNYITHSLRHS ATLCPYPC C

Bra038285a-HCb CVICYEGIT VDKMFSVDCG HRF CF SCMKQHVEIKLLGGKT RICPDSGC C

Bra038306-HCb CLICMDEKSP SDIFRGTSTCT HSY CT ECTVRYVTVKEENAARA RIKCPDMNC C

Bra038573-HCb CNICND SPEDAVVSCG HRF CK QCFYECTGDD NLCPIAN C

Bra039068-HCb CEICMDDDL QSYMTMRMDCG HCF CN NCWKEHFTVKINEGM SK RIRCMAYK C

Figure S3 Multiple sequence alignment of 44 RING-v domains of *B. rapa*.

Bra000030-V \* \* CRICHLGVVETSG ---GGA ---IELGCSCKEDLAGAHRQCAGTWFKIKGDKLVAHRQCAETWFKIKG ---DKICEIC

Bra001193-V CRICL-DVLEEGRNT ---LKMESCCKGDLR ---LVHBCALKWFSYTKG ---TRTCDVC

Bra001210-V CRICRSABEPGNA ---LMHPCSCRSIK ---VYHDCILFLWNRNR ---YKQCEVC

Bra002470-V CRICLVDLCEGGET ---FKMECSCKGELA ---LAHKDCALKWFTIKG ---NKTCEVC

Bra002600-V CRICHLPLETTNKADCECEDSDPEQEEQBBEED EEEYGLPIQLGCSCKDLG ---LAHSHCAETWFKIKG ---NMTCEIC

Bra005147-V CRICHLGVVETSG ---GGA ---MELGCSCKEDLA ---IAHRQCAETWFKIKG ---DKICEIC

Bra005444-V CRICHVGSQDTPDR ---VSKRTV ---VSLLELQIGCKCKNELA ---LAHFHCAEAWFKIRG ---NSVCEIC

Bra005697-V CRICHLGLESSRR ---ECGD FVILGCSCKDDL G ---VYHRQCAETWFKIKG ---DKICEIC

Bra009138-V CRICHTMLDANLN ---ESGV GIELGCSCKDDLA ---AAHKCAETWFKIKG ---NKICEVC

Bra009367-V CRVCCAESDRRD ---AALGFLGITPPVSEPRRSSNAKKQETTDHKTGGFELISPDGEVFCANEDIEMGAWG-HRDITLLELGCSCKNDLA ---LVHYACALKWFSYTKG ---STVCEIC

Bra010084-V CRICQDED-SVKM ---LECPSCSGSLK ---YAHRCVQRWCNEKG ---DITCEIC

Bra011370-V CRICQSPPEPNP ---LRHPCACRGSIK ---VYHDCILFLWNRNR ---SKHCEIC

Bra011487-V CRICRNPGADNP ---LRYPCACSGSIK ---FVHQDCLLQWLNRHSN ---ARQCEVC

Bra014329-V CRICHDED-LDCN ---METFPCSCSGSLK ---YAHRCVQRWCNEKG ---DITCEIC

Bra014845-V CRICKSEVG ---YQ ---QGL ---IELGCSCKGDLA ---FSHRCQCAETWFKIKG ---NQVCEIC

Bra017626-V CRICRNPGADNP ---LRYPCACSGSIK ---FVHEDCLLQWLSFSK ---ARHCEVC

Bra018136-V CRICQED-ITNN ---LETPCACNGSLK ---YAHRCVQRWCNEKG ---DITCEIC

Bra018414-V CRICLENSDILG ---DELISPCMKGTQQ ---FVHRCLDHWRSVKGFAFASHCTC

Bra019507-V CRICQED-TIQN ---LEAPCANGSLK ---YAHRCVQRWCNEKG ---DITCEIC

Bra020240-V CRICLVDLCEGGET ---LKMESCCKGELA ---LAHKDCALKWFTIKG ---NKTCEVC

Bra020758-V CRICL-DECEGNT ---LKMESCCKGDLR ---LVHBCALKWFSYTKG ---TRTCDVC

Bra022967-V CRICHFSGSDQTPDR ---VSGKS ---VSDVLEIGCKCKNELG ---LAHFHCAEAWFKIRG ---NSVCEIC

Bra023691-V CRICL-DVCEGNT ---LKMESCCKGDLR ---LVHBCALKWFSYTKG ---TRTCDVC

Bra024797-V CRICQDEC-PIKT ---LESFPCACSGSLK ---YAHRCVQRWCNEKG ---NICEIC

Bra024893-V CRICHDED-LDSN ---METFPCSCSGSLK ---YAHRCVQRWCNEKG ---NTNCEIC

Bra026840-V CRICQEES-AIKN ---LESFPCSCNGSLK ---YAHRCVQRWCNEKG ---NTICEIC

Bra028398-V CRICHDED-EDSN ---METFPCSCGTLK ---FAHHCQIQRWNEKG ---DITCEIC

Bra028747-V CRICHMSLDSVNL ---ESGV ---IELGCSCKNDLA ---AAHKCAETWFKIKG ---NKICEVC

Bra028847-V CRICMVELGDESA ---FKMECSCKGELA ---LSHKCAETWFKIKG ---NITCDVC

Bra029202-V CRVCSAESDRRD ---AALGFLGIT ---LKTNADET ---VDDN ---VSKST ---ETDIEMGILQHQDPLLELGCSCKNELA ---STVCEIC

Bra029259-V CRICQED-SVKM ---LESFPCSCSGSLK ---YAHRCVQRWCNEKG ---DITCEIC

Bra029597-V CRICRSPEEPGNP ---LRYPCACRGSIK ---FVHQDCLRWLRIRG ---NNKCEVC

Bra029786-V CRICLVELGDESA ---FKMECSCKGELA ---LAHKDCALKWFSYTKG ---NKTCDVC

Bra029787-V CRICMVELGDESA ---FKMECSCKGELA ---LAHKDCALKWFTIKG ---NKTCDVC

Bra030264-V CRICLETD ---G ---RDFIAPCKCKGTSK ---LVHRDCLDHWRAIKGFAFASHCTC

Bra030491-V CRICLDVG ---G ---EDLIGPCNCKGTQR ---VYHRDCLDHWRSVKGFAFASHCTC

Bra030505-V CRICHEE-PESY ---FEAPCSCGTLK ---FVHRDCLQWRNEKG ---NTICEIC

Bra031231-V CRICLESD ---G ---RDFIAPCKCKGTSK ---LVHRDCLDHWRAIKGFAFASHCTC

Bra031736-V CRICLENDCELG ---DELISPCMKGTQQ ---LVHRDCLDHWRSVKGFAFASHCTC

```

Bra033335-V CRICHEEEEAESY-----FEAPCSCSGTVK-----FAHRDCIQRWCDEKG---NTICEIC
Bra036295-V CRICHEEE-RESF-----FEVPCACSGTVK-----FAHRDCIQRWCNEKG---NITCEIC
Bra037753-V CRVCHSTESDRRD-AALGLLEITPPVPEARKSNADAE---EAEQKSCIVKSN---IDIELGIQQQHQAALIELGSCCKNELA---LVHYACALKWFLNHG---STVCEIC
Bra038662-V CRVCHSVESDRRD-TALGLGILTPPIPEARKSNADDVSKDTEAEQKSSIVKSN---VNPIDIEMGIQQ-HQDALIELGSCCKNELA---LVHYACALKWFLNHG---STVCEIC
Bra040226-V CRICL-DVLEEGNT-----LKMESCKGDLR-----LVHEACAIKWFSTKG---TRTCDVC

```

Figure S4 Multiple sequence alignment of 38 RING-C2 domains of *B. rapa*.

```

* * * * *
Bra000934-C2 CHQCKN-LTDK-----VNLVFCSCCKKRY-CYDCIKK-----WYPETTSEEVQAAACPFC
Bra000936-C2 CHQCKN-LTDK-----VDLVFCSCCKKRY-CYDCIKR-----WYPERTPPEVVDACPCFC
Bra004233-C2 CYICRYRQEQP-----LDCVCEGFVL-CFRCATLPHKLRVYKH-----EHLVLFYSYKEYADDELWYCEIC
Bra005845-C2 CQICSDNVGKTV-----GDRFVACDVGCFV-CRCPYEF-----ERK-----DGNQSCPQC
Bra006036-C2 CQICGDEIELSD-----GESFVACNECAFFV-CRCPYEF-----ERR-----EGNQSCPQC
Bra006407-C2 CEICGDIQGLTVE-----DGLFVACNECGFPA-CRCPYEF-----ERR-----EGSQNCPQC
Bra006677-C2 CPLCAEMDLT-----DQQLKPKC-CGYQI-CVWCWHH-----IVDMAEKDQIEGRCPAC
Bra008170-C2 CPLCAEMDLT-----DLLFQCASCSEYKM-CLFCYNN-----INE-----STRVCPQC
Bra009365-C2 CPHCQSRVEKSDNY-----LRIVTC-CGYAF-CWRCLK-----PEEDHRGGLDYCFEV
Bra010131-C2 CPICYEDLDLT-----DSSLFPC-CGFRL-CLFCHK-----ICD-----GDGRCPQC
Bra011345-C2 CQICGDHAGLTET-----GDLFVACNECAFFV-CRCPYEF-----ERK-----DGTQCCPC
Bra011429-C2 CPVYCEDAQFTV-----FNRRHCHRLCGRVF-CAKCAAN-----SIPSPSDEAKSHBESSDRRIRVNCYC
Bra011865-C2 CQICGDDIELSVN-----GELFVACNECAFFV-CRCPYEF-----ERR-----EGNQACPQC
Bra011940-C2 CPLCAEMDLT-----DQHFVKPK-CGYQI-CVWCWHR-----IEMAEDKDTGRCPCAC
Bra012578-C2 NNTCGEEIGVKPN-----GEFVACHCESFP-CKACLEY-----EFK-----EGRRICLR
Bra013525-C2 CHWCGT-RGS-----EDLISCLSCSEKEFF-CVDCIEK-----RNKGS-KEEVEKRCPCV
Bra015887-C2 CPICSEGMDAT-----DLSFLPC-CGFRL-CLFCHK-----INE-----NDGRCPAC
Bra016801-C2 CHQCFK-GER-----RFLFICTCEEKLY-CFPCIKK-----WYPHLSHDDVIEKCPFC
Bra018086-C2 CPICYEDLDLT-----DSNFLPC-CGFRL-CLFCHK-----ICD-----GDGRCPQC
Bra020455b-C2 CPKCYHMVGRSYG-----CNRITCR-CGNAF-CYKCGY-----LWNRGIHGDCNQD
Bra022865b-C2 CIVAIDFASGRS-----EHYDVSCL-CSYEF-CWNCGEDAHRPVDCDTSVKWISKNTDESENTNWLANTKPCPC
Bra023952-C2 CQICGDHAGLTET-----GDLFVACNECAFFV-CRCPYEF-----DRK-----DGTQCCPC
Bra024324-C2 CKICRDEIELTV-----GEPFVACNECAFFV-CRCPYEF-----ERR-----EGNQACPQC
Bra027055-C2 CHQCLK-GER-----ITLLVCSCEETMY-CLQCIRK-----WYPHLSEDDIVDKPCFC
Bra028768-C2 CQICSDNVGKTV-----GDRFVACDVGCFV-CRCPYEF-----ERK-----HGNQSCPQC
Bra029238-C2 CPICYEDLDST-----DASFFPC-CGFKL-CLFCHK-----IYD-----GDGRCPQC
Bra029664-C2 CHQCQR-NDN-----GEVVRQNCDDRKY-CHKLET-----WYPRIPHEEDIAKRCPCFC
Bra029874-C2 CQICTENVGRAEN-----GYPFVACDVCSFSV-CRCPYEF-----ERR-----YGNQSCPQC
Bra030754-C2 CHHCLR-KDR-----ERLISCLCNQRAF-CDACITT-----QYSDIPLSEEVEKVCPCAC
Bra031904-C2 CEICRDEIESTVD-----GEPFVACNECAFFV-CRCPYEF-----ERR-----EGNQACPQC
Bra033714-C2 CRICRDEVDKGDN-----GQTFVACHVCAFFV-CKPCYEF-----ERS-----NGNKCPCQC
Bra035692-C2 CPLCAEMDLT-----DQHLNPKC-CGYQI-CVWCWHQ-----IEMAEDKDTGRCPCAC
Bra037394-C2 CHQCKIMSSK-----TDLVFCSICVKNRY-CKDCLK-----WYPERTPPEGVKAAACPFC
Bra037793-C2 CEICRDEVELTV-----GEPFVACNECAFFV-CRCPYEF-----ERR-----EGNQACPQC
Bra038282-C2 CPLCAEMDLT-----DQQLNPKC-CGYQI-CVWCWHH-----IIDMAEKDQIEGRCPAC
Bra038285b-C2 CIRCNMVELAFG-----CYHITCR-CGYEF-CYTGAEWK-----NKKATCACPIW
Bra038775-C2 CHWCGT-RGF-----EDLISCLSCSEKEFF-CVDCIEK-----RNKGS-KEEVEKRCPCV
Bra040045-C2 CKTCGKRYKKNVKSQAQRDLRHFHSSWSCPSCRV-----CEVCRRT-----GDP-----NKVFCCKRC

```

Figure S5 Sequence alignment of 731 RING domains in 715 putative proteins of *B. rapa*.

```

* * * * *
Bra000007-H2 CIVC-----LSVFDGG-----EIRRR-LSA-----CK-HAF-HVS-C-----IET-----WL-KDH-PN-----CPI-C 42
Bra000143-H2 CAVC-----KENFELK-----SAARE-MP-----CN-HIY-HPD-C-----LLP-----WL-AIR-NS-----CPV-C 41
Bra000207-H2 CAVC-----KDFEELK-----TEAKQ-MF-----CN-HIY-HSD-C-----IVP-----WL-VQH-NS-----CPV-C 41
Bra000350-H2 CAIC-----REDFVIG-----ESARR-LP-----CD-HLY-HHD-C-----ITP-----WL-TSH-NT-----CPL-C 41
Bra000673-H2 CAIC-----LNEFDDE-----ETLRW-MFP-----CS-HTF-HAS-C-----IDV-----WL-SSW-ST-----CPV-C 42
Bra000683-H2 CAIC-----LEDYRIG-----DKLRI-LP-----CN-HKF-HVG-C-----VDL-----WL-GOR-RSF-----CPV-C 42
Bra000742-H2 CIVC-----LSDFESD-----DNIRQ-LFN-----CR-HVF-HDH-C-----LDLRIV-DCR-KMT-----CPI-C 44
Bra000951-H2 CSIC-----YEDLK-PVAEN-----LQ-SISA-----CG-HVF-HEL-C-----LQ-----QWFE-YCP-STNKRN-----CPI-C 48
Bra001080-H2 CSVC-----LSEFQEE-----ERIRM-LFK-----CS-HAF-HVA-C-----IDT-----WL-KSH-SN-----CPL-C 42
Bra001153-H2 CSIC-----LDTVARDGD-----RAWAN-LQ-----CG-HQF-HLD-C-----CG-----IG-----SAFNKGVGMQ-----CPN-C 45
Bra001381-H2 CPVC-----QDRFEVG-----SVARK-LP-----CK-HIY-HSE-C-----IIP-----WL-IQR-NT-----CPV-C 41
Bra001390-H2 CCIC-----LQGLIERG-----EKRVY-LFM-----CR-HCY-HCC-C-----VDR-----WL-MPE-SS-----CPL-C 42
Bra001582-H2 CIVC-----QEVTKR-----DKIAM-LD-----CK-HEY-HPA-C-----LE-----KWL-IRN-Y-----CPI-C 42
Bra001639-H2 CAVC-----LSEFERT-----ESGRV-LPG-----CK-HTF-HVD-C-----IDM-----WF-HSH-ST-----CPL-C 42
Bra001721-H2 CIVC-----LSDFVAG-----EQRL-LK-----CN-HGF-HVR-C-----IDK-----WL-TQQ-MT-----CPK-C 42
Bra001767-H2 CAVC-----MDEFEDG-----GDWQK-MP-----CK-HVF-HQD-C-----LMP-----WL-ELH-NS-----CPV-C 41
Bra002061-H2 CAIC-----LTFEADG-----EIRV-LPL-----CG-HSF-HVA-C-----IDK-----WL-VSR-SS-----CPS-C 42
Bra002084-H2 CSVC-----LQDFQIG-----ETVRS-LPH-----CH-HMF-HLP-C-----IDK-----WL-LRH-GS-----CFM-C 42
Bra002147-H2 CSVC-----KKLLSQKSPWCSHKILRSQDMPAAGV-----FP-----CH-HVY-HVE-C-----LDKVTPT-SQTRDPS-----CPA-C 59
Bra002176-H2 CPIC-----YE-YLFDLS-----KD-TIVMK-----CG-HTM-HFE-C-----CG-----HTM-RDKFC-----CPI-C 43
Bra002312-H2 CAIC-----RNHIMDLCTEQCANQASATSEECTVAV-----GV-----CN-HAF-HFH-C-----ISR-----WL-KTR-QV-----CPL-D 56
Bra002336-H2 CAVC-----LGDLEDG-----DEVRE-LRN-----CS-HVF-HRE-C-----IDRWLYECCGGDD-NDGEED-NHRT-----CPL-C 56
Bra002382-H2 CSIC-----LPEFCDSDP-----ST-LTS-----CK-HEF-HLQ-C-----LL-----EWC-QRS-SQ-----CFM-C 41
Bra002441-H2 CPVC-----FE-YLFDST-----RD-ITVLR-----CG-HAM-HLE-C-----TKDM-----GL-HNRVT-----CPL-C 43
Bra002456-H2 CAIC-----LTAMKAGQ-----GHAI-FTAE-----CS-HSF-HFH-C-----ITTN-----VQGN-QF-----CPV-C 44
Bra002559-H2 CAVC-----TEVFEAE-----TEARE-MP-----CK-HIF-HDD-C-----ITP-----WL-SIR-NS-----CPV-C 41
Bra002636-H2 CIVC-----LGLWEVG-----DFGRK-LRF-----CG-HGF-HVE-C-----IDM-----WL-SSH-SS-----CPL-C 42
Bra002690-H2 CDLC-----GRDLASDPERP-----NVS-LRSLQEVCVLD-----CG-HVY-HFK-C-----LKG-----TLDD-LDNRS-TNPS-----CPI-C 58
Bra002823-H2 CSVC-----LDEFKGVY-----EAKRE-MP-----CK-HKF-HVK-C-----IVP-----WL-ELH-SS-----CPV-C 43
Bra003083-H2 CAIC-----LSEIEFN-----ETIRM-IFL-----CQ-HCF-HAD-C-----IDB-----WL-KLN-GP-----CPV-C 42
Bra003351-H2 CIVC-----LSDFEFK-----ETVMY-TE-----CK-HMF-HBE-C-----IVP-----WL-KSK-QG-----CPL-C 41
Bra003404-H2 CAVC-----LSRFEED-----DQLRL-LPL-----CC-HAF-HAD-C-----IDI-----WL-VSN-QT-----CPL-C 42
Bra003450-H2 CAVC-----LVEFEGE-----EIRW-LRN-----CR-HIF-HRS-C-----LD-----RWM-DHQ-KT-----CPL-C 43
Bra003507-H2 CSVC-----LSEFEKE-----DEGRV-LPK-----CG-HVF-HVD-C-----IDT-----WF-RSR-SS-----CPL-C 42
Bra003667-H2 SCLC-----EKEVPKE-----GEIVR-KTR-----CN-HIF-HGT-C-----IS-----RVL-LR-IPH-----CPF-C 42
Bra003720-H2 CIVC-----LTFEFAAG-----DELRV-LPQ-----CG-HGF-HVS-C-----IDT-----WL-ESH-SS-----CPS-C 42
Bra003754-H2 CGAC-----SKPEKSSVANFERQIAA-----VL-A-----CG-HVY-HAE-C-----LEMTTE-IEKYDLA-----CHV-C 51
Bra003830-H2 CSIC-----QEEYEGK-----DEVGK-LR-----CG-HRY-HIR-C-----AK-----QWLL-RKN-S-----CPV-C 41
Bra003887-H2 CPVC-----LNEFDDE-----ETLR-LK-----CC-HVF-HPG-C-----VDA-----WL-RSH-AT-----CPL-C 42
Bra004008-H2 CPIC-----FYEYAEENPKT-----VLQ-----CG-HIF-HLA-C-----IK-----EWM-ERS-AA-----CPF-C 41
Bra004280-H2 CCIC-----LSSYEDG-----TELVT-LP-----CN-HHF-HST-C-----IY-----WL-RMN-AT-----CPL-C 41
Bra004287-H2 CAIC-----KEEFVVG-----EKGKE-LTS-----CL-HLY-HTS-C-----IVS-----WL-NIH-NT-----CPI-C 41
Bra004342-H2 CCIC-----QEGFFLGGY-----AT-ITS-----CS-HVF-HSS-C-----ITD-----WI-NKS-TK-----CPL-C 41
Bra004436-H2 CSIC-----LELVVDGGS-----RSSAK-LQ-----CG-HQF-HLD-C-----CG-----IG-----SAFNKGVGMQ-----CPN-C 45
Bra004446-H2 CSVC-----LSEFVEE-----DQGR-LFK-----CG-HVF-HVD-C-----IDT-----WF-RSS-ST-----CPL-C 42
Bra004563-H2 CSIC-----LCEYREA-----EMIRM-MPE-----CK-HYF-HLC-C-----LDA-----WL-KLN-GS-----CPV-C 42
Bra004589-H2 CPVC-----KEEFELG-----AEAKU-MP-----CN-HVY-HSD-C-----IVP-----WL-VQH-NS-----CPV-C 41
Bra004685-H2 CAVC-----LPLLEEK-----DTARM-LFN-----CK-HVF-HMT-C-----VDT-----WL-TTH-ST-----CPI-C 42
Bra004686-H2 CAVC-----LAPLEEK-----DTARM-LAN-----CK-HVF-HMA-C-----VDT-----WL-ATH-ST-----CPI-C 42
Bra004687-H2 CAVC-----LSSLLEEQ-----DTARE-LPS-----CK-HVF-HVD-C-----VDK-----WL-TAC-ST-----CPV-C 42
Bra004847-H2 CSIC-----LQDAEAG-----EKMR-LTA-----CS-HCF-HAG-C-----IDP-----WL-EKR-ST-----CPL-C 42
Bra004935-H2 CCIC-----LCDYEDG-----TELRE-LS-----CR-HHF-HEA-C-----IDK-----WL-RIN-AT-----CPL-C 41
Bra005020-H2 CAVC-----KETFILD-----SAARE-MP-----CN-HIY-HPD-C-----ILP-----WL-AIR-NS-----CPV-C 41
Bra005066-H2 CSIC-----LTRMKGGG-----GHAI-FTAE-----CS-HSF-HFH-C-----IASN-----VKHGN-QV-----CPI-C 44

```



|              |      |  |                              |          |            |       |     |      |     |     |        |          |          |            |                |     |    |    |
|--------------|------|--|------------------------------|----------|------------|-------|-----|------|-----|-----|--------|----------|----------|------------|----------------|-----|----|----|
| Bra005307-H2 | CPIC |  | LDGDKGN                      | DLRQ     | LPD        | CN    | HFF | HLK  | C   | VDM | WL     | RIN      | PT       | CPV        | C              | 42  |    |    |
| Bra005343-H2 | CAIC |  | LSEFSD                       | DTVRL    | ITV        | CR    | HGF | HSI  | C   | IDL | WF     | ESH      | KT       | CPV        | C              | 42  |    |    |
| Bra005374-H2 | CAVC |  | LCEFEDE                      | ETLRL    | MFP        | CC    | HVE | HAD  | C   | VSV | WL     | SER      | ST       | CPL        | C              | 42  |    |    |
| Bra005375-H2 | CVVC |  | LCEFDQD                      | DRLSL    | MPN        | CC    | HVY | HAD  | C   | VDD | WL     | SDH      | ST       | CPL        | C              | 42  |    |    |
| Bra005859-H2 | CSIC |  | FEDLS                        | DVDEE    | SI         | ELMD  | CS  | HVE  | HKV | C   | LEF    | QWLV     | SKS      | S          | CPL            | C   | 43 |    |
| Bra005970-H2 | CAVC |  | KDEMGIG                      | SRGVVLQP | LP         | CN    | HKY | HGE  | C   | IVP | WL     | ETR      | NT       | CPV        | C              | 43  |    |    |
| Bra006070-H2 | CSIC |  | QDEYVDC                      | DEVGT    | MP         | CE    | HMY | HVS  | C   | VQ  | QWLR   | MKN      | W        | CPI        | C              | 41  |    |    |
| Bra006321-H2 | CPTC |  | LEEYTSNPKI                   | VTK      |            | CC    | HBY | HLS  | C   | IY  | EVM    | ERS      | OD       | CPV        | C              | 41  |    |    |
| Bra006415-H2 | CSVC |  | LSEFEED                      | ESLRL    | LPK        | CN    | HAF | HLP  | C   | IDT | WL     | RSJ      | SN       | CPL        | C              | 42  |    |    |
| Bra006470-H2 | CPIC |  | FE                           | YLDLSL   | KE         | TVMK  | CG  | HFM  | HCE | C   | ISR    | YHEMK    | RDKFC    | CPI        | C              | 43  |    |    |
| Bra006565-H2 | CAIC |  | RNIIMDLCECQANQASATSEBCIVAW   | GV       |            | CN    | HAF | HFA  | C   | ISR | WL     | KTR      | QV       | CPL        | D              | 56  |    |    |
| Bra006583-H2 | CAVC |  | LQDLEED                      | DEVR     | LRN        | CS    | HVE | HRE  | C   | FVK | WL     | GRU      | DS       | CPL        | C              | 53  |    |    |
| Bra006585-H2 | CCTR |  | KENLVIC                      | DRMG     | LP         | CK    | HFT | HFP  | C   | LKP | WL     | DEL      | NS       | CPL        | C              | 41  |    |    |
| Bra006603-H2 | CSIC |  | LEARCESEP                    | ST       | LFS        | CK    | HEV | HLQ  | C   | LL  | EWK    | QRS      | SQ       | CFM        | C              | 41  |    |    |
| Bra006641-H2 | CPVC |  | FE                           | YLDST    | RD         | ITVLR | CG  | HFM  | HLQ | C   | TKDM   | GL       | HNRVT    | CPV        | C              | 43  |    |    |
| Bra006709-H2 | CAVC |  | TEVEGEE                      | TEARE    | MP         | CK    | HIF | HED  | C   | IVP | WL     | SIR      | NS       | CPV        | C              | 41  |    |    |
| Bra006752-H2 | CVIC |  | LGLEVEG                      | EFGRR    | LRT        | CG    | HGF | HVE  | C   | IDM | WL     | SSH      | ST       | CPL        | C              | 42  |    |    |
| Bra006916-H2 | CSIC |  | LMDVEDE                      | DAVTQ    | LFR        | CN    | HLE | HVL  | C   | IEP | WL     | LR       | GLT      | CPL        | C              | 43  |    |    |
| Bra007174-H2 | CSVC |  | LEQVTVG                      | EVVRT    | LP         | CL    | HQF | HAV  | C   | IDP | WL     | RQD      | GT       | CPV        | C              | 41  |    |    |
| Bra007253-H2 | CPVC |  | KEEFELK                      | SEAKQ    | MP         | CK    | HMY | HSD  | C   | IVP | WL     | VQH      | NT       | CPV        | C              | 41  |    |    |
| Bra007414-H2 | CSVC |  | LEDFELK                      | ETVML    | TP         | CK    | HMF | HBE  | C   | VQ  | WL     | SKS      | GQ       | CPV        | C              | 41  |    |    |
| Bra007504-H2 | CAVC |  | KEDFVVG                      | ESAKR    | LP         | CS    | HIY | HSD  | C   | IVP | WL     | SDH      | NS       | CPL        | C              | 41  |    |    |
| Bra007515-H2 | CAVC |  | LSKFEFE                      | DQLRL    | LFL        | CC    | HAF | HAD  | C   | IDT | WL     | VSN      | QT       | CPL        | C              | 42  |    |    |
| Bra007580-H2 | CSIC |  | LCAVEDEG                     | AELRE    | LP         | CR    | HMF | HVS  | C   | VDK | WL     | RIN      | AT       | CPL        | C              | 41  |    |    |
| Bra007606-H2 | CAVC |  | LYEVEG                       | QELRW    | LRN        | CR    | HIF | HRS  | C   | LD  | RWMD   | HDO      | KT       | CPL        | C              | 43  |    |    |
| Bra007613-H2 | CSIC |  | LCEYME                       | EMVRM    | MPE        | CK    | HMF | HVS  | C   | IDA | WL     | KLN      | GS       | CPV        | C              | 42  |    |    |
| Bra007629-H2 | CSIC |  | LSEYATEK                     | ETVRF    | LPE        | CE    | HCF | HAE  | C   | LDA | WL     | KLH      | SS       | CPV        | C              | 42  |    |    |
| Bra007694-H2 | CSVC |  | LSEFEDE                      | DEGRV    | LPK        | CG    | HVF | HVD  | C   | IDT | WL     | RSR      | SS       | CPL        | C              | 42  |    |    |
| Bra007789-H2 | CAIC |  | LEGLVKND                     | TF       | DLPY       | CS    | HVF | HST  | C   | LL  | EWT    | ERS      | RKGGGS   | CPL        | C              | 42  |    |    |
| Bra007847-H2 | CAIC |  | LDDFELK                      | FMSM     | FFG        | CF    | HGF | HRE  | C   | LL  | EWT    | ERS      | RKGGGS   | CPL        | C              | 45  |    |    |
| Bra007848-H2 | CAIC |  | LEDMSES                      | QAFVC    | QFPFC      | CV    | HVF | HED  | C   | FVK | WL     | GRU      | DS       | CPL        | C              | 43  |    |    |
| Bra008015-H2 | CPIC |  | LANEVED                      | ETLRL    | LPK        | CC    | HVE | HPC  | C   | IDA | WL     | QSH      | AT       | CPL        | C              | 42  |    |    |
| Bra008016-H2 | CPVC |  | LANEFEDA                     | ERLRL    | LPK        | CC    | HVE | HPC  | C   | IDA | WL     | QSH      | PT       | CPL        | C              | 42  |    |    |
| Bra008018-H2 | CPVC |  | LANEFED                      | ESLRL    | LPK        | CN    | HAF | HIS  | C   | IDT | WL     | RSJ      | TN       | CPL        | C              | 42  |    |    |
| Bra008028-H2 | CAIC |  | LSLDVKG                      | DKARL    | LPK        | CN    | HSP | HVE  | C   | IDM | WL     | QSH      | ST       | CPL        | C              | 42  |    |    |
| Bra008075-H2 | CVVC |  | LSELAEG                      | DKAKL    | LPS        | CK    | HWF | HAI  | C   | IDA | WL     | ESH      | AT       | CPI        | C              | 42  |    |    |
| Bra008196-H2 | SSTC |  | SNDLATGSHYASSGKGMWLNITFSELGQ | VFSKQ    | GMMSSVAVLA | CG    | HVY | HAE  | C   |     |        | LETVTTE  | IEKYDPA  | CPI        | C              | 74  |    |    |
| Bra008257-H2 | CAIC |  | LTEFAAG                      | DELVR    | LQD        | CG    | HGF | HVS  | C   | IDT | WL     | GSH      | SS       | CPS        | C              | 42  |    |    |
| Bra008462-H2 | CPVC |  | LERLDQ                       | DTGG     | LI         | TM    | CN  | HSP  | HCS | C   | ISN    | WF       | DSS      | CPV        | C              | 40  |    |    |
| Bra008475-H2 | CCIC |  | LARYGDD                      | EVRE     | LP         | CL    | HVE | HVD  | C   | VDK | WL     | KLN      | AT       | CPL        | C              | 41  |    |    |
| Bra008518-H2 | CRIC |  | QDEFEG                       | EQVRS    | LRN        | CA    | HVE | HKT  | C   |     | IDRWIH | DDK      | MT       | CPL        | C              | 43  |    |    |
| Bra008671-H2 | CAIC |  | MGDVVK                       | EKVT     | LP         | CW    | HYY | HGE  | C   | IVP | WL     | EMK      | NT       | CPV        | C              | 41  |    |    |
| Bra008675-H2 | CPTC |  | LEEYTSNPKI                   | VTK      |            | CS    | HMF | HLS  | C   | IY  | EVM    | ERS      | ED       | CPV        | C              | 41  |    |    |
| Bra009015-H2 | CSIC |  | QDEYVDC                      | DEVGT    | MP         | CE    | HMY | HVS  | C   | VQ  | QWLR   | MKN      | W        | CPI        | C              | 41  |    |    |
| Bra009037-H2 | CSVC |  | LSEFEED                      | EGVRL    | LPK        | CS    | HAF | HVS  | C   | IDT | WL     | LSH      | KN       | CPL        | C              | 42  |    |    |
| Bra009136-H2 | CAVC |  | LARFEP                       | EVRLR    | LPK        | CK    | HAF | HVE  | C   | VDV | WL     | DAH      | ST       | CPL        | C              | 42  |    |    |
| Bra009297-H2 | CSIC |  | LCDVVAR                      | DPVRC    | IPE        | CN    | HCF | HAD  | C   |     |        | VDEWLR   | TSAT     | CPL        | C              | 42  |    |    |
| Bra009323-H2 | CAIC |  | NDEMDVQ                      | TEAVG    | LP         | CD    | HKL | HTE  | C   | IVP | WL     | KTR      | NF       | CPV        | C              | 41  |    |    |
| Bra009570-H2 | CVIC |  | KEEMSG                       | RDVCE    | MP         | CG    | HLE | HKC  | C   | ILP | WL     | SKR      | CPV      | C          | 41             |     |    |    |
| Bra009663-H2 | CSVC |  | LQDFVQ                       | ETVRS    | LPH        | CH    | HMF | HLP  | C   | IDK | WL     | RGH      | AS       | CPL        | C              | 42  |    |    |
| Bra009800-H2 | CSIC |  | QDEYVDC                      | DEVGT    | LP         | CQ    | HMY | HVS  | C   | AQ  | QWLR   | MKN      | W        | CPI        | C              | 41  |    |    |
| Bra009912-H2 | CPDC |  |                              | NAM      | E          | CN    | HSP | HLH  | C   | ILK | WV     | NSQ      | TSQAH    | CFM        | C              | 34  |    |    |
| Bra009960-H2 | CAIC |  | LNVEFDD                      | ETLRL    | LPK        | CD    | HVE | HPIH | C   | IGA | WL     | QGH      | VL       | CPV        | C              | 42  |    |    |
| Bra009962-H2 | CAIC |  | LTEFGDD                      | ETLRL    | LPK        | CD    | HVE | HAI  | C   | IGA | WL     | QGH      | VL       | CPV        | C              | 42  |    |    |
| Bra010204-H2 | SVIC |  | LGDYQAD                      | DKLQ     | ILS        | GG    | HTF | HMD  | C   | IDL | WL     | TSJ      | ST       | CPL        | C              | 42  |    |    |
| Bra010289-H2 | CVVC |  | LEGFRGG                      | QCGRK    | LPG        | CG    | HVE | HKK  | C   | VDF | WL     | VKV      | GT       | CPI        | C              | 42  |    |    |
| Bra010349-H2 | CSVC |  | LSKFEV                       | ELRL     | LPK        | CR    | HAF | HIG  | C   | IDP | WL     | EQH      | AT       | CPL        | C              | 42  |    |    |
| Bra010370-H2 | CVIC |  | MTAINLROKRTSD                | FM       | VTP        | CE    | HFF | HIG  | C   | LQ  | RWMD   | IKM      | E        | CPI        | C              | 44  |    |    |
| Bra010473-H2 | CAIC |  | REFM                         | KA       | KRLH       | CN    | HLE | HLG  | C   | LR  | WL     | DQGLN    | DVYS     | CPI        | C              | 41  |    |    |
| Bra010532-H2 | CAIC |  | LMFESDG                      | ETLRL    | LPL        | CR    | HAF | HVA  | C   | IDK | WL     | TSR      | SS       | CPS        | C              | 42  |    |    |
| Bra010641-H2 | CAIC |  | LNVELDR                      | ETVRL    | LPV        | CN    | HLE | HVA  | C   | IDA | WL     | YSH      | AT       | CPV        | C              | 42  |    |    |
| Bra010702-H2 | CGAC |  | SRPLSEKLSWSSQKMFMTNELSVSA    | IL       | A          | CG    | HVY | HGE  | C   |     |        | LEKMTPE  | IDKFDPS  | CPI        | C              | 59  |    |    |
| Bra010752-H2 | CSIC |  | LESFPTQDP                    | AT       | VTS        | CK    | HEV | HLQ  | C   | II  | EWS    | QRS      | KE       | CPI        | C              | 41  |    |    |
| Bra010969-H2 | CCVC |  | LCGFKKE                      | EVESE    | LVS        | CK    | HFF | HRA  | C   | LD  | NWFG   | NNH      | TT       | CPL        | C              | 43  |    |    |
| Bra011068-H2 | CSVC |  | LSKFEV                       | ELRL     | LPK        | CR    | HAF | HVG  | C   | IDQ | WL     | EQH      | AT       | CPL        | C              | 42  |    |    |
| Bra011187-H2 | CVIC |  | LDGFRQ                       | QCRR     | LPG        | CG    | HVE | HKK  | C   | IDP | WL     | VKV      | GT       | CPL        | C              | 42  |    |    |
| Bra011188-H2 | CAVC |  | LSKFEV                       | ELRL     | LPK        | CR    | HAF | HVA  | C   | IDP | WL     | EQH      | AT       | CPL        | C              | 42  |    |    |
| Bra011215-H2 | CVIC |  | LDYEMN                       | ETGKQ    | MPA        | CQ    | HKE | HVC  | C   | LDY | WL     | QJH      | SS       | CPV        | C              | 41  |    |    |
| Bra011359-H2 | CCIC |  | LAKVANN                      | EELRE    | LP         | CS    | HFF | HKE  | C   | VDK | WL     | KLN      | AS       | CPL        | C              | 41  |    |    |
| Bra011618-H2 | CAIC |  | LTEPTD                       | ETLRL    | LPL        | CN    | HAF | HVA  | C   | IDK | WL     | TSR      | SS       | CPS        | C              | 42  |    |    |
| Bra011643-H2 | CSVC |  | LQDFVQ                       | ETVRS    | LPH        | CH    | HMF | HLP  | C   | IDN | WL     | LPH      | GS       | CFM        | C              | 42  |    |    |
| Bra011873-H2 | CGAC |  | SRPLSEKSMWSSQKIFMTNELSVSA    | IL       | A          | CG    | HVY | HGE  | C   |     |        | LEQKMTPE | IDKFDPS  | CPI        | C              | 59  |    |    |
| Bra011991-H2 | CIIC |  | LSKFEV                       | ETVRF    | IPH        | CG    | HLE | HVD  | C   | VDT | WL     | NSH      | VF       | CPL        | C              | 42  |    |    |
| Bra012055-H2 | CAIC |  | LEDVRF                       | DSLRL    | LP         | CQ    | HAF | HLS  | C   | IDS | WL     | TKW      | GTS      | CPV        | C              | 42  |    |    |
| Bra012134-H2 | CVIC |  | LDELKND                      | AS       | TIA        | CG    | HDF | HVE  | C   | IK  | NWLM   | VKN      | K        | CPL        | C              | 41  |    |    |
| Bra012251-H2 | CAIC |  | LTEFSD                       | DELVR    | LQD        | CG    | HGF | HVS  | C   | IDT | WL     | GSH      | SS       | CPS        | C              | 42  |    |    |
| Bra012330-H2 | CPVC |  | LNGFED                       | ETLRL    | LPQ        | CC    | HVE | HPC  | C   | IDA | WL     | RSJ      | VT       | CPL        | C              | 42  |    |    |
| Bra012441-H2 | CVIC |  | LEEKAK                       | ETVKE    | MP         | CK    | HVF | HGG  | C   | VEK | WL     | GLH      | GS       | CPV        | C              | 41  |    |    |
| Bra012630-H2 | CAIC |  | LLEFEDHV                     | L        | RL         | LTT   | CY  | HVF  | HQE | C   | IDL    | WF       | ESH      | KT         | CPV            | C   | 42 |    |
| Bra012814-H2 | CSIC |  | LVDYAE                       | DAVTH    | LFR        | CN    | HLE | HIN  | C   | IEP | WL     | LS       | GHLT     | CPL        | C              | 43  |    |    |
| Bra013006-H2 | CAVC |  | REEMSVG                      | NEVAE    | LP         | CR    | HKY | HGE  | C   | IVP | WL     | GIR      | NF       | CPV        | C              | 41  |    |    |
| Bra013110-H2 | CTIC |  | LEPLVTRD                     | DRRTFVLR |            | CG    | HKF | HLD  | C   |     |        | SLIK     | IG       | SFAVAKGFMD | CPN            | C   | 47 |    |
| Bra013118-H2 | CCQC |  | QAAPDES                      | GGLT     | KLK        | CL    | HAF | HVS  | C   | LV  | SLLK   | SIP      | PHYAPPGV | CPI        | C              | 51  |    |    |
| Bra013211-H2 | CSVC |  | LNKFEV                       | GSDV     | KLS        | CG    | HLE | HKE  | C   |     |        | VEKID    | VRI      | TT         | CPL            | C   | 42 |    |
| Bra013267-H2 | CSIC |  | LSEFEDE                      | ESLRL    | LPL        | CG    | HIF | HVY  | C   | IDR | WL     | SM       | SN       | CPL        | C              | 42  |    |    |
| Bra013268-H2 | CAIC |  | LLEFDDHV                     | L        | RL         | LTT   | CY  | HVE  | HQE | C   | IDL    | WF       | ESH      | KT         | CPV            | C   | 42 |    |
| Bra013751-H2 | CCVC |  | LSEFELK                      | EELVE    | MPS        | CK    | HIF | HLD  | C   | IHL | WL     | YSH      | TT       | CPL        | C              | 42  |    |    |
| Bra013876-H2 | CAIC |  | REFMAKA                      | KKLIH    |            | CN    | HLE | HLG  | C   | LRS | WL     | DQGLN    | EVYS     | CPI        | C              | 42  |    |    |
| Bra014043-H2 | CCVC |  | QEEVKEG                      | EMGV     | LE         | CG    | HDF | HSQ  | C   | IK  | EMLK   | RKN      | L        | CPL        | C              | 41  |    |    |
| Bra014174-H2 | CVIC |  | LSDFVCG                      | EKLR     | LPK        | CN    | HGF | HVR  | C   | IDK | WL     | KQH      | LT       | CPK        | C              | 42  |    |    |
| Bra014175-H2 | CVIC |  | LSDFVCG                      | EKLR     | LPK        | CN    | HGF | HVR  | C   | IDK | WL     | QQH      | LPT      | CPK        | C              | 42  |    |    |
| Bra014177-H2 | CVIC |  | LSEFVSE                      | ERVKL    | LPT        | CH    | HGF | HVR  | C   | IDK | WL     | SSH      | SS       | CPI        | C              | 42  |    |    |
| Bra014221-H2 | CSIC |  | LESFPTG                      | DMLIS    | LS         | CT    | HSP | HSS  | C   | LN  | PWLI   | ACG      | D        | CPY        | C              | 41  |    |    |
| Bra014266-H2 | CAVC |  | KEVFLG                       | NETTQ    | LP         | CL    | HLV | HPIH | C   | IVP | WL     | GAR      | NS       | CPL        | C              | 42  |    |    |
| Bra014339-H2 | CVIC |  | LSTLKSQ                      | EVVRK    | LQ         | CR    | HVE | HLQ  | C   | LE  | GWL    | QHL      | NFK      | CPL        | C              | 41  |    |    |
| Bra014424-H2 | CSIC |  | LSEYASS                      | ETVGC    | LTI        | CE    | HCF | HVE  | C   | IDT | WL     | QLR      | SS       | CPI        | C              | 42  |    |    |
| Bra014435-H2 | CAVC |  | LYEVEG                       | QELRW    | LRN        | CR    | HIF | HRS  | C   | LD  | RWMD   | HDO      | KT       | CPL        | C              | 43  |    |    |
| Bra014499-H2 | CPIC |  | LYPLFPE                      | DGESD    | OMP        | FMKL  | MS  | HCF  | HCE | C   | ILRWV  | NWL      | HTE      | KRADS      | VNGNSGSDVSKLGN | CPV | C  | 68 |
| Bra014508-H2 | CAVC |  | LQEAEBG                      | DRMR     | LTI        | CR    | HCF | HAD  | C   | IVP | WL     | GEM      | SST      | CPL        | C              | 43  |    |    |
| Bra014684-H2 | CPVC |  | KEEFELK                      | SEAKQ    | MP         | CK    | HVF | HSD  | C   | IVP | WL     | VQH      | NT       | CPV        | C              | 41  |    |    |
| Bra015142-H2 | CSVC |  | LSNFEE                       | DSRIN    | KLK        | CG    | HLE | HKT  | C   |     |        | LEKVID   | YWN      | TT         | CPL            | C   | 42 |    |
| Bra015160-H2 | CTIC |  | FTLRLP                       | AVL      | FM         | CM    | HSP | HQR  | C   |     |        | LG       | DNK      | TE         | CPV            | C   | 36 |    |
| Bra015221-H2 | CCIC |  | QDEFEG                       | DLGT     | LE         | CG    | HIF | HVA  | C   | IK  | QWLM   | RKN      | Y        | CPI        | C              | 41  |    |    |
| Bra01        |      |  |                              |          |            |       |     |      |     |     |        |          |          |            |                |     |    |    |

Table with columns for protein IDs (e.g., Bra016880-H2), domain types (e.g., CAVC), domain names (e.g., LSVFEQ), domain positions (e.g., 1-20), domain types (e.g., DTARE), domain positions (e.g., 1-20), domain types (e.g., CR), domain positions (e.g., 1-20), domain types (e.g., HVE), domain positions (e.g., 1-20), domain types (e.g., HVD), domain positions (e.g., 1-20), domain types (e.g., C), domain positions (e.g., 1-20), domain types (e.g., IDT), domain positions (e.g., 1-20), domain types (e.g., WL), domain positions (e.g., 1-20), domain types (e.g., TTC), domain positions (e.g., 1-20), domain types (e.g., ST), domain positions (e.g., 1-20), domain types (e.g., CPV), domain positions (e.g., 1-20), domain types (e.g., C), domain positions (e.g., 1-20).

Bra029441-H2 CSIC LDNLVLS - DKHGVST-RMT CS--HVF -HEK C LL -VWFQ -RKN T - CPL-C 43
Bra029442-H2 CSIC LDNLVSGRSNSKRGIPT-RMT CS--HVF HDG C LL -EWLG -RKN T - CPL-C 48
Bra029869-H2 CPVC QDRFEMG -SSARK-MF CR--HIY -HSE C IVP -WL -EQH -NS - CPV-C 41
Bra030136-H2 CAVC KDAMVMS -EIGKK-LP CG--HFY -HDN C ILP -WL -ETR -NS - CPV-C 41
Bra030218-H2 CGIC SQSVKFGQ -GTAL-FTAE CS--HTF -HFF C -VTSR - -AAAADHN RLVI - CPV-C 47
Bra030408-H2 CSIC LEVEEDD -HEIMR-LNK CG--HIF -HFF C MD -SWL -ARH -RS - CPN-C 42
Bra030712-H2 CAIC LDEFKED -KCAL-FTAE CS--HSF -HFD C -ITSN - -VKGN -RI - CPL-C 44
Bra030854-H2 CSVC LDEFKG -VEAK-MF CE--HVF -HGE C LLP -WL -ELH -SS - CPV-C 41
Bra030982-H2 CPIC WEFEPT -ELDIN-SLS CN--HTY -HHD C -ISN - -WV -EKT -LT - CPY-C 42
Bra030987-H2 CSIC LSPFKFE -DRIRI-LFP CS--HAF -HLD C -IST -WL -ISN -KT - CPL-C 41
Bra031056-H2 CPIC HEYTFISNPA -KA-LP CG--HVM -HSA C -FOEYI - -CS -HYT - CPL-C 42
Bra031193-H2 CGAC SRPLSQSKLSSSKIPATNELSVAA -IL-A- CG--HVI -HSE C - - -LEQMTPE -ADKDFDQ - CPV-C 59
Bra031441-H2 CSIC MNEFVN -ETVRY-LPH CG--HLE -HID C -IDL - -WF -ESH -KT - CPV-C 42
Bra031849-H2 CSIC LQRVSDQT -NSITV-FTAE CS--HSF -HLS C - -AVRL - -QDK -K - CPL-C 43
Bra032086-H2 CAIC LEDMSKEES -EVLCC-QPPE CL--HMF -HED C -LTN - -WL -DRH -DS - CPL-C 45
Bra032514-H2 CSVC LNEFQED -EKLR-IPI-CN--HVF -HID C -IDI - -WL -QGN -AN - CPL-C 42
Bra033193-H2 CSVC LGDQAN -ENKQQ-IPP CG--HVF -HMD C -IDL - -WL -TLH -TT - CPL-C 42
Bra033599-H2 CAAC ARPLSEKSLWRSQNIEMINELSVSA -VL-A- CG--HVV -HGD C - - -LEQMTPE -VDFKDPDS - CPI-C 59
Bra033652-H2 CCIC QEYETEG -DDMT-LE CG--HEF -HSQ C -IK - -EWLK -QKN -L - CPL-C 41
Bra033680-H2 CSVC LNEFQED -EKLR-IPI-CN--HVF -HID C -IDI - -WL -QGN -AN - CPL-C 42
Bra033777-H2 CLIC LEEFHIG -HEVGG-LP CA--HNF -HVE C -IDQ - -WL -RLN -VK - CPR-C 41
Bra033953-H2 CAIC KEEFEVG -EEKKE-LK CL--HLY -HPS C -IVS - -WL -NLH -NT - CPL-C 41
Bra033963-H2 CCIC LSSYEDG -IELVI-LP CN--HMF -HST C -IK - -WL -KMN -AT - CPL-C 41
Bra034152-H2 CLIC LGDFVEG -EKVRY-LPK-CN--HGF -HVR C -IDT - -WL -LSR -DS - CPY-C 42
Bra034259-H2 CAIC LEDLWYN -KQLK-LPH CS--HGF -HFR C -ISK - -WL -QSR -NS - CPL-C 41
Bra034573-H2 CSVC LSEFEVE -ETLRL-LPK CR--HAF -HVF C -IDT - -WL -RSH -TN - CPV-C 42
Bra034865-H2 CCIC LGGLEGG -EKMV-LPL CR--HCV -HCE C -VDR - -WL -MTE -SS - CPL-C 42
Bra035010-H2 CPVC LENIESCQ -SARL-VFG CN--HGF -HQL C - -ADWLNSH -TV - CPV-C 42
Bra035230-H2 CVVC LSDFDSD -DDRQ-LFN CR--HVF -HHR C - -LDRLV -DCC -KVT - CPV-C 44
Bra035284-H2 CSIC LDNLVGS -SSIHGSAT-IMN CS--HVF -HER C -LS -DWLG -QKN -T - CFM-C 45
Bra035483-H2 CSIC LIDFMD -DYMRL-IST CN--HVF -HIT C -IDL - -WF -ESH -KT - CPV-C 42
Bra035560-H2 CVIC LEDFEVI -DVRV-LVG CK--HVF -HVE C -IDS - -WC -FYK -LH - CPV-C 42
Bra035785-H2 CSIC LGDFVEG -QVGR-LER CG--HTF -HMK C -ID - -WF -LRQ -VS - CPL-C 42
Bra035835-H2 CAVC MDEFEDG -GDVKG-VB CK--HVF -HOD C -LMP - -WL -ELH -NS - CPV-C 41
Bra036197-H2 CAIC REKLAP -ERLSE-LP CR--HYV -HKD C -ISS - -WL -TNR -NT - CPL-C 44
Bra036491-H2 CVIC MATIDLRRRTND -CM-VIP CE--HLE -HSG C -LQ -RWMD -IKM -E - CPY-C 44
Bra036631-H2 CAIC LNEFEDD -ETLCL-LPK CD--HVF -HPH C -IGA - -WL -EGH -VT - CPV-C 42
Bra036816-H2 CSVC LMRDED -DAIKS-LP CS--HEF -HSL C -VDT - -WF -DVS -RKC - CPL-C 43
Bra037002-H2 CSVC LSEFEVE -EMLR-LPK CR--HAF -HLS C -LDT - -WL -RSH -TN - CPL-C 42
Bra037109-H2 CSVC LDDFEVG -VEAKQ-MF CK--HNF -HAD C -IDD - -WL -ELH -SS - CPV-C 41
Bra037333-H2 CPIC FEDYEADPKI -KYN CS--HDF -HLS C -IL - -EWK -EKS -DG - CPI-C 41
Bra037367-H2 CSIC YEDLK-PALEN -LQ-SISA CG--HVF -HCE C -LQ - -WFE -VCP -STNKRN - CPL-C 48
Bra037410-H2 CCIC NCPLKTFPS -TLRVR-VFN CG--HAT -HLQ C - - -EVSSE -TSSSG - CPV-C 45
Bra037561-H2 CAIC LSEFVGG -ERVKL-LPK CH--HGF -HVR C -IDK - -WL -SSH -SS - CPY-C 42
Bra037562-H2 CVIC LSDFVAG -EQVRL-LPK CN--HGF -HVR C -IDK - -WL -KQH -HT - CRK-C 42
Bra037592-H2 CPIC CEFIFTSSEIV -RA-LP CG--HVM -HSA C - -FOAYT - -CS -HYT - CPL-C 42
Bra037644-H2 CSIC LQDAEG -EKRRR-LTA CG--HCF -HAE C -IDP - -WL -EKR -ST - CPY-C 42
Bra037900-H2 CAIC NDGMVIC -ETVKK-LP CG--HCV -HGN C -ILP - -WL -GTR -NS - CPV-C 41
Bra037999-H2 CVIC LDDFEMG -EKIKL-LP CG--HIF -HSD C -SLP - -WL -QIR -NS - CPV-C 41
Bra038051-H2 CAIC LSEFEES -EPRV-LFN CK--HAF -HVE C -IDM - -WF -LSH -SS - CPL-C 42
Bra038109-H2 CVIC QSEFKVE -EKIAT-LD CG--HEV -HAG C -LE - -KVLV -VKN -V - CPL-C 41
Bra038199-H2 CAVC LGDLEDG -DEVRE-LRN CS--HVF -HRE C - -IDRMLDVEG -DD -NDGEED -NHRT - CPL-C 53
Bra038240-H2 CVIC RLDVEDD -DDLIL-LP CK--HSY -HSE C -INN - -WL -KIN -KI - CPV-C 41
Bra038246-H2 CAVC MDEFEDG -GDVKG-MF CK--HVF -HOD C -LMP - -WL -ELH -NS - CPV-C 41
Bra038386-H2 CAVC LNEFKED -EMLR-LP CG--HVF -HVA C -VDI - -WF -SYR -ST - CPL-C 42
Bra038545-H2 CPVC LCFEAE -DKLR-LPK CS--HAF -HVD C -VDT - -WL -LSH -ST - CPL-C 42
Bra038813-H2 CVIC LDGFRGG -QWCRN-LPG CG--HVF -HVK C -IDD - -WL -LKA -AS - CPL-C 42
Bra039168-H2 CPIC LEEYTSNPKI -VTK CS--HMF -HLS C -ID - -EWK -ERS -EN - CPV-C 41
Bra039281-H2 CPIC LSEYASK -ETVRC-IPE CE--HCF -HIE C -YA - -WL -KLH -GS - CPL-C 42
Bra039282-H2 CPIC LSEYASK -ETIR-MPE CD--HCF -HVE C -IDV - -WL -KLH -GS - CPL-C 42
Bra039287-H2 CVIC LCEYKRA -EMLR-MPE CK--HYF -HLC C -IDV - -WL -KLN -GS - CPV-C 42
Bra039317-H2 CCVC LCEYEDG -TELRE-LW CR--HMF -HEA C -IDK - -WL -RIN -AT - CPL-C 41
Bra039318-H2 CCVC LCEYEDG -TELRE-LW CR--HMF -HEA C -IDK - -WL -RIN -AT - CPL-C 41
Bra039430-H2 CSIC LDTVAKGD -RAWAN-LQ CG--HLE -HLD C - - -SAFNKAGV -CPN-C 45
Bra039454-H2 CAIC LNEFEDD -ETLRL-VFK CG--HVF -HPH C -IGA - -WL -EAG -VT - CPV-C 42
Bra039652-H2 CCIC LSEFTNG -DMGIS-LP CD--HVF -HSS C -LA - -WFLK -AG -D - CPL-C 41
Bra039654-H2 CVIC QSEFKVE -EKIKL-LP CG--HIF -HAR C - - -KVV -VGN -V - CPL-C 41
Bra039822-H2 CCVC QSTDFDGG -GLVT-RLG CL--HAI -HTS C - -LV -SLIK -SEF -PHITAPAGV - CPY-C 51
Bra039842-H2 CCIC QEEVAG -DDLGT-LE CG--HEF -HKD C -IK - -QVW -LKN -L - CPL-C 41
Bra040087-H2 CCIC LAKVANN -EELRE-LP CS--HVF -HKE C -VDK - -WL -KIN -AS - CPL-C 41
Bra040450-H2 CVIC QLKYKIG -EKQM-LP CK--HVV -HSE C -ISK - -WL -SIN -KI - CPV-C 41
Bra040498-H2 CSIC LNSVKGQ -GTAK-YTAE CS--HVF -HFF C - -VIDVVS -KIG -KIV - CPV-C 45
Bra040540-H2 CSIC IETVTKED -RAWAK-LH CG--HEF -HLD C - -IG - -SAFNKAGV -CPN-C 45
Bra040564-H2 CAVC LSHLVGD -DKARV-LPG CN--HGF -HVD C -IDM - -WF -QSH -ST - CPL-C 42
Bra040642-H2 CAIC LNEFEDD -ETLRL-LPK CD--HVF -HPH C -IDA - -WL -EAH -VT - CPV-C 42
Bra040855-H2 CPVC LNEFEDD -ETLRL-LPQ CC--HVF -HPG C -IDA - -WL -RSH -AT - CPL-C 42
Bra040966-H2 CCIC LCEYEDG -VELRE-LP CN--HMF -HCT C -IDK - -WL -HIN -SR - CPL-C 41
Bra000043-Hca CAIC -FD-ARRD -CFELP CG--HCV -CYQ C - - -GT -KTA -AAG -S - CPV-C 39
Bra000106-Hca CAIC LETVFN -YA-LK CG--HIF -CKA C -ACSAASV -MIFQ -GVK -AAPQCSK - CPY-C 49
Bra000249-Hca CPVC TNLMYFPIN -Q CPNHTL -CSS C -KQ - -QV -QNT -CPY-C 36
Bra000250-Hca CVIC MDLSKE -PVV-TN CG--HLY -CWF C -LY -RWLE -VSV -AKE - CPV-C 40
Bra000425-Hca CPIC LEPLSIPF -Q -DNHGLA -CSS C - -CFK -LKN -CPS-C 36
Bra000480-Hca CPIC FEQVCTIE -VKD CG--HQM -CAQ C -TLA - -LCCH -NKP -NEFTTSTVTFPV -CPY-C 49
Bra00054b-Hca CRIC LEIPIHSV -V-L-L- CG--HSE -CVR C - - -AT -GANAGC -CPM -CPY-C 48
Bra000646-Hca CPIC -MDIT -VD-RGLDC CG--HYG -CRPMC - - -AT -SRA -ASA - -KRYKAYARDEKSKPAELL - CPL-C 63
Bra000729-Hca CSIC -MRKK -GAE-IP CG--HMF -CFE C -IDN - -WR -SSI -MML - CPL-C 38
Bra000784-Hca CRVC LSNENK -MA-FG CG--HTF -CRV C - - -SREVMAR -GS -CPL-C 37
Bra000997-Hca CPIC LSEEDMR -RLKG-TLDC CG--HQT -CCB C - - -GS -GP -D-LKV -CPL-C 38
Bra001159-Hca CGIC -CVRIK -GATF-TS CS--HVF -CFT C - -IMENK -VESR -CPL-C 38
Bra001236-Hca CCVC LDRVLSKATF -GERKFGILLTE CG--HTF -CKL C - -SKELMAG -GH -CPV-C 47
Bra001285-Hca CSVC -GKGEAS -VLL-LP CH--HFP -CIQ C -IRN -WR -SSAFV -SGMDVNSTLRA - CPL-C 49
Bra001477-Hca CRSC -NNLYDR -ATT-ISE CR--HMCL -CSV C - -G -SSVYI -CPV-C 36
Bra001901-Hca CPIC LTFPKDT -AV-MF CL--HTFY -CKR C - -AK -LEDKL -VVENLKA -CPV-C 41
Bra002208-Hca CVIC LERKCTVSA -DG CR--HCL -CSD C - -AK -ELRF -QSN -K -CPL-C 39
Bra002699-Hca CAVC LTFPRDT -TV-LP CG--HEF -CTN C - -ALVLTSTTTNTSKTTSGATPGS -VF -CPL-C 52
Bra003133-Hca CVIC QS-LLEDST -RC-VN CR--HMCM -CSG C - -AK -LRF -QTN -L -CPL-C 40
Bra003180-Hca CMLC LLSLKE -PVL-TC CT--HVF -KVV C -L -AR -FKD -CPL-C 34
Bra003314-Hca CNIC TNLMYFPIN -Q CG--HLY -CWF C -LF -OWLG -ISE -AKE -CPY-C 39
Bra003315-Hca CPVC TNLMYFPIN -Q CPNHTL -CSS C -KA -RV -QNT -CPT-C 36
Bra003473-Hca CPVC ADNLK -WVAG -S -CHNGHTL -CST C -KN -RV -HNR -CPT-C 47
Bra003493-Hca CAVC -QVDPATP -FIA-LP CG--HRE -CST C - -VV -RFR -VLC -DPR -CCT-C 32
Bra003533-Hca CPIC LESPINAM -L-L-L- CG--HRY -CIV C -IRI -RC -ASA -ASFR -CLR-C 40
Bra003669-Hca CPVC WEFEPT -EN-VEPYLW CG--HYG -CRPMC - - -AT -SRA -ASA - -KRYKAYARDEKSKPAELL - CPL-C 63
Bra003806-Hca CPIC RQVMUL -PVT-TP CG--HTI -CKD C -LLALARAIVVIXSSGFF -FIL -PEFT -CFM-C 52
Bra004082a-Hca CRIC IQLPER -PVT-TP CA--HNF -CKA C -LEDKFAGQTLRERSRGR -TLRA -QKN -VMN -CPC-C 57
Bra004082b-Hca CSFC FOALTOVVF -Q -CA--HNF -CLK C - - -KWIIG -QCK -RI -CAK-C 38
Bra004174-Hca CPVC -LEPLR -GPI -YQ -DNHGLA -CSS C -CR -ELRN -K -CPL-C 36
Bra004176-Hca CPIC LWFIPN -MA-FN -CHNGHTL -CSF C -LPRVY -KI -EDLHV -CPL-C 36
Bra004260-Hca CPIC FEDPINV -VLL-LP CG--HQT -CSD C - -G -EDLHV -CPL-C 34
Bra004339-Hca CRVC FEFNIV -EN-VEPYLW CR--HVL -CST C - -V -CEK -CKK -CPL-C 39
Bra004373-Hca CPIC CHALTNPIF -Q CG--HTL -CQN C -VFALQPAVL -RLSS -QDI -KVPEFVS -CPW-C 50
Bra004401-Hca CPVC CHALTRVVF -Q -DNHGLA -CSS C -CT -NLRN -K -CPY-C 36
Bra004402-Hca CPVC AENLE -WVAG -F -DNHGLA -CSS C -CT -NLRS -K -CPS-C 37
Bra004478-Hca CAVC LLSLKE -PVV-TN CG--HRE -CST C -VV -RFR -ILG -DRR -CCI-C 41
Bra004666-Hca CVVC LEKED -PIL-TC CG--HLE -CWS C -LY -RWLG -VSE -AKE -CPV-C 40
Bra004829-Hca CNIC NDRSKE -VVI-TC CG--HLE -CWE C - -FYQLPFT -VLN -IKK -CPL-C 41
Bra004879-Hca CRAC -FD-ARRD -CFELP CF--HLE -CNP C - - -VOK -IIOTRO -RK -CPT-C 39
Bra005128-Hca CAIC LNVMDIV -VTA-AP CG--HVA -CYQ C -GT -KITE -AAG -RS -CPL-C 40
Bra005251-Hca CSIC MKDEV -VVF-LP CL--HNF -CNG C - - -FEEMR -RSEARHQVL -CPQ-C 44
Bra005352-Hca CLIC NASQEV -LIL-VR CA--HVV -CAS C - -SEFMS -GDKAT -CPC-C 40





|                |                                               |                         |                   |            |              |              |   |    |               |                                        |                      |       |     |    |    |
|----------------|-----------------------------------------------|-------------------------|-------------------|------------|--------------|--------------|---|----|---------------|----------------------------------------|----------------------|-------|-----|----|----|
| Bra022967-V    | CRIC                                          | HFSGDQDFDR              | VS-GKS-VSVDLIEIG  | CK         | CKNEELGIAHFH | C            |   | AE | AWFK-LRG      | NSV                                    | CEI                  | C     | 58  |    |    |
| Bra023691-V    | CRIC                                          | LDVCE                   | EGNTL-KME         | CS         | CKGDLRLVHEH  | C            |   | AI | KWFS-TKG      | TRI                                    | CDV                  | C     | 47  |    |    |
| Bra024797-V    | CRIC                                          | QDECPILTK               | LE-SF             | CA         | CSGSLKYAHRR  | C            |   | VQ | RWCN-EKG      | NLI                                    | CEI                  | C     | 46  |    |    |
| Bra024893-V    | CRIC                                          | HDEDLDSN                | ME-TP             | CS         | CSGSLKYAHRR  | C            |   | VQ | RWCN-EKG      | NTN                                    | CEI                  | C     | 46  |    |    |
| Bra026840-V    | CRIC                                          | QEEESALKN               | LE-SF             | CS         | CNGSLKYAHRR  | C            |   | VQ | RWCN-EKG      | NTI                                    | CEI                  | C     | 46  |    |    |
| Bra028398-V    | CRIC                                          | HDEDENSN                | MD-TP             | CS         | CSGTLKFAHHQ  | C            |   | IQ | RWCN-EKG      | DTL                                    | CEI                  | C     | 46  |    |    |
| Bra028747-V    | CRIC                                          | HMSLDSVNL               | ESGVF-IELG        | CS         | CKNDLAAAHKII | C            |   | AE | TKWF-LKG      | NKI                                    | CEV                  | C     | 48  |    |    |
| Bra028874-V    | CRIC                                          | MVELGE                  | DSEAF-KME         | CM         | CKGELALSHKA  | C            |   | TI | KWFF-LKG      | NIT                                    | CDV                  | C     | 52  |    |    |
| Bra029202-V    | CRVCHSSESDDRKGDAALGFGLGITLTKNNADETVDDNVSKSSTE | TDIEMGLLQ               | HQDPL-LELQ        | CS         | CKNELLALVHYA | C            |   | AL | KWFL-NHG      | STV                                    | CEI                  | C     | 90  |    |    |
| Bra029259-V    | CRIC                                          | QEEESVKN                | LE-SF             | CS         | CSGSLKYAHRR  | C            |   | VQ | RWCN-EKG      | DTI                                    | CEI                  | C     | 46  |    |    |
| Bra029597-V    | CRIC                                          | RSPEEPGNP               | LR-YF             | CL         | CRGSLKRVHQD  | C            |   | LR | TWLLI-RRG     | NNK                                    | CEV                  | C     | 47  |    |    |
| Bra029786-V    | CRIC                                          | LVELGE                  | DSEAF-KME         | CM         | CKGELALSHKA  | C            |   | TI | KWFF-LKG      | NRT                                    | CDV                  | C     | 48  |    |    |
| Bra030264-V    | CRIC                                          | MVELGE                  | DSEAF-KME         | CM         | CKGELALSHKA  | C            |   | TI | KWFF-LKG      | NRT                                    | CDV                  | C     | 48  |    |    |
| Bra030264-V    | CRIC                                          | LETDGRDF                | IA-P              | CK         | CKGTQKIVARD  | C            |   | LD | HWR-AIK       | EGFAFAH                                | CTT                  | C     | 48  |    |    |
| Bra030491-V    | CRIC                                          | LDVCG                   | GE-DLIGP          | CM         | CKGTQKIVARS  | C            |   | LD | HWR-STK       | EGFAFAS                                | CTE                  | C     | 48  |    |    |
| Bra030505-V    | CRIC                                          | HEEE-PESV               | FE-AP             | CS         | CSGTLKFAHRD  | C            |   | IQ | RWCN-EKG      | NTI                                    | CEI                  | C     | 46  |    |    |
| Bra031231-V    | CRIC                                          | LESDDRF                 | IA-P              | CK         | CKGTQKIVARD  | C            |   | LD | HWR-AIK       | EGFAFAH                                | CTT                  | C     | 48  |    |    |
| Bra031736-V    | CRIC                                          | LENDCEL                 | LG-DELISP         | CM         | CKGTQQIVARS  | C            |   | LD | HWR-SVK       | EGFAFAS                                | CTT                  | C     | 52  |    |    |
| Bra033335-V    | CRIC                                          | HEEEAESV                | FE-AP             | CS         | CSGTVKFAHRD  | C            |   | IQ | RWCN-EKG      | NTI                                    | CEI                  | C     | 47  |    |    |
| Bra036295-V    | CRIC                                          | HEEE-AESF               | FE-VE             | CA         | CSGTVKFAHRD  | C            |   | IQ | RWCN-EKG      | NIT                                    | CEI                  | C     | 46  |    |    |
| Bra037753-V    | CRVCHSSESDDRKGDAALGELLEITPPEARKSNADAEA        | EAEQKSCIVKSN            | IDIELLQIQQ        | HQGAL-IELG | CS           | CKNELLALVHYA | C | AL | KWFL-NHG      | STV                                    | CEI                  | C     | 98  |    |    |
| Bra038662-V    | CRVCHSSESDDRKGDAALGELLEITPPEARKSNADVSKDTAEA   | QKSSIVKSN               | GVNVIDIEMGLQHQDAL | -LELG      | CS           | CKNELLALVHYA | C | AL | KWFL-NHG      | STV                                    | CEI                  | C     | 105 |    |    |
| Bra040034-C2   | CHQC                                          | LDVLE                   | EGNTL-KME         | CS         | CKGDLRLVHEA  | C            |   | AI | KWFS-TKG      | TRT                                    | CDV                  | C     | 47  |    |    |
| Bra040034-C2   | CHQC                                          | KN-LTQKVN               | LVF               | CSK        | CTKKRY       | CDV          |   |    | IKKWYPERITSEE | VQAA                                   | CPF                  | C     | 48  |    |    |
| Bra040034-C2   | CHQC                                          | KN-LTQKVD               | LVF               | CSK        | CTKKRY       | CDV          |   |    | IKKWYPERITSEE | VRDA                                   | CPF                  | C     | 48  |    |    |
| Bra040233-C2   | CYIC                                          | RYRQEQP                 | LD                | CVB        | CGFVL        | CFR          |   |    | ATLPHKLYR     | KHD                                    | EHLIVFSYKRYADDDDELYW | CEI   | C   | 60 |    |
| Bra0405845-C2  | CYIC                                          | SDNVGKIV                | DGRF-VA           | CNE        | CGFPV        | CRP          |   |    | CDV-FCR       | YR                                     | FBRKD                | GNQS  | CPF | C  | 46 |
| Bra0406036-C2  | CYIC                                          | GDIEELS                 | DGESE-VA          | CNE        | CGFPV        | CRP          |   |    |               | YE                                     | YERRE                | GNQS  | CPF | C  | 46 |
| Bra0406407-C2  | CEIC                                          | GDQIGLTV                | EGDLE-VA          | CNE        | CGFPA        | CRP          |   |    |               | YE                                     | YERRE                | GNQS  | CPF | C  | 46 |
| Bra0406677-C2  | CFIC                                          | AEEMD-LTDQ              | LK-P              | CK         | CGYQI        | CWV          |   |    | WHIIVD        | MAEKDK                                 | TEGR                 | CPA   | C   | 48 |    |
| Bra0408170-C2  | CFIC                                          | AERMD-ATDLL             | FE-Q              | CAS        | CEYRM        | CLF          |   |    | YNM-T         | NES                                    | TRV                  | CPG   | C   | 43 |    |
| Bra0409365-C2  | CHQC                                          | QSRVKKSDSNV             | LR-IVT            | CV         | CSYAF        | CWR          |   |    | LR            | FEEDIR                                 | GGLDY                | CFE   | V   | 48 |    |
| Bra0410131-C2  | CFIC                                          | YEDLD-LTSS              | FL-P              | CF         | CGFRL        | CLF          |   |    |               | HKIIDG                                 | DR                   | CPG   | C   | 42 |    |
| Bra0411345-C2  | CYIC                                          | GDHAGLVE                | TGDLF-VA          | CNE        | CGFPV        | CRP          |   |    |               | YE                                     | YERKD                | GTQC  | CPH | C  | 46 |
| Bra0411429-C2  | CPVC                                          | YECDAGFT                | VFNK-RHII         | CRL        | CGRVE        | CAK          |   |    | AANSISPSDEAKD | SHESSSDR                               | RIRV                 | CNY   | C   | 62 |    |
| Bra0411865-C2  | CYIC                                          | YEDLD-LTSS              | FL-P              | CNE        | CGFPV        | CRP          |   |    |               | YE                                     | YERRE                | GNQA  | CPQ | C  | 46 |
| Bra0411940-C2  | CFIC                                          | AEEMD-LTDQ              | FK-P              | CK         | CGYQI        | CWV          |   |    | WHRIIE        | MAEKDK                                 | TEGR                 | CPA   | C   | 48 |    |
| Bra0412578-C2  | CNTC                                          | GEEIGVKP                | NGEPE-VA          | CHE        | CSFPI        | CKA          |   |    |               | LEY                                    | EFEGRRI              | CLR   | C   | 46 |    |
| Bra0413525-C2  | CHWC                                          | GTRG                    | SE-DLIS           | CLS        | CEKEFF       | CDV          |   |    |               | IEKRNGKSKKEE                           | VEKK                 | CPV   | C   | 46 |    |
| Bra0415887-C2  | CFIC                                          | SEGMD-ATDLS             | FL-P              | CF         | CGFRL        | CLF          |   |    |               | HKQINEN                                | DGR                  | CPA   | C   | 42 |    |
| Bra0416801-C2  | CHQC                                          | FK                      | GERR-LFI          | CTF        | CEEKL        | CFP          |   |    |               | IKKWYPHLSHDD                           | VIEK                 | CPF   | C   | 47 |    |
| Bra0418086-C2  | CFIC                                          | YEDLD-LTSS              | FL-P              | CF         | CGFRL        | CLF          |   |    |               | HKIIDG                                 | DR                   | CPG   | C   | 42 |    |
| Bra0420455b-C2 | CFKC                                          | YHMVGRSYG               | ENRIT             | CR         | CGNAF        | CYK          |   |    | GY            | LWNR                                   | GLH                  | GD    | CNQ | D  | 44 |
| Bra0422865b-C2 | CTVA                                          | IDP                     | ASGSRSEHYDVS      | CL         | CSYEF        | CWN          |   |    |               | GEDAHRFPVDDTVSKWISKNIDESENINWILLANITKP |                      | CNP   | C   | 70 |    |
| Bra0423952-C2  | CYIC                                          | GDNAGLVE                | TGDLF-VA          | CNE        | CGFPV        | CRP          |   |    |               | YE                                     | YDRKD                | GTQC  | CPQ | C  | 46 |
| Bra0424324-C2  | CKIC                                          | RDEIELTV                | DGEPF-VA          | CNE        | CGFPV        | CRP          |   |    |               | YE                                     | YERRE                | GNQA  | CPQ | C  | 46 |
| Bra0427055-C2  | CHQC                                          | LK                      | GERTI-LIV         | CSE        | CEETMY       | CLG          |   |    |               | IRKWYPHLSHDD                           | IVDK                 | CPF   | C   | 47 |    |
| Bra0428768-C2  | CYIC                                          | SDNVGKIV                | DGRF-VA           | CDI        | CGFPV        | CRP          |   |    |               | YE                                     | YERKI                | GNQS  | CPF | C  | 46 |
| Bra0429238-C2  | CFIC                                          | YEDLD-LTSS              | FL-P              | CF         | CGFRL        | CLF          |   |    |               | HKIIDG                                 | DR                   | CPG   | C   | 42 |    |
| Bra0429664-C2  | CHQC                                          | GRINDG                  | EIVR              | QCN        | CCDRKRY      | CHK          |   |    |               | LETWYFPHIED                            | IAKK                 | CPF   | C   | 48 |    |
| Bra0429874-C2  | CYIC                                          | TENVGRAE                | NGVPE-VA          | CDV        | CSFSV        | CRP          |   |    |               | YE                                     | YERV                 | GNQS  | CPQ | C  | 46 |
| Bra0430754-C2  | CHWC                                          | LR-KDRER                | IL-S              | CLK        | CNGRAF       | CDV          |   |    |               | ITITQSDIPLEE                           | VEKV                 | CPA   | C   | 47 |    |
| Bra0431904-C2  | CEIC                                          | RDEIESTV                | DGEPF-VA          | CNE        | CGFPV        | CRP          |   |    |               | YE                                     | YERRE                | GNQA  | CPQ | C  | 46 |
| Bra0433714-C2  | CRIC                                          | RDEIKDGD                | NGQTP-VA          | CHV        | C-AFPV       | CKP          |   |    |               | YE                                     | YERSN                | GNKC  | CPQ | C  | 46 |
| Bra0435692-C2  | CFIC                                          | AEEMD-LTDQ              | LK-P              | CK         | CGYQI        | CWV          |   |    |               | WHQIE                                  | MAEKDK               | TEGR  | CPA | C  | 48 |
| Bra0437394-C2  | CHQC                                          | KIMMSKID                | LVF               | CSI        | CVNKRY       | CKD          |   |    |               | IKKWYPERITPEG                          | VQAA                 | CPF   | C   | 49 |    |
| Bra0437793-C2  | CEIC                                          | RDEIELTV                | DGEPF-VA          | CNE        | CGFPV        | CRP          |   |    |               | YE                                     | YERRE                | GNQA  | CPQ | C  | 46 |
| Bra0438282-C2  | CFIC                                          | AEEMD-LTDQ              | LK-P              | CK         | CGYQI        | CWV          |   |    |               | WHIIVD                                 | MAEKDK               | SEGR  | CPA | C  | 48 |
| Bra0438285b-C2 | CIR                                           | NNMVELAFG               | CYHIT             | CR         | CGYEF        | CYT          |   |    |               | GAEWKI                                 | KKATCA               | CPI   | W   | 45 |    |
| Bra0438775-C2  | CHWC                                          | GTRG                    | FE-DLIS           | CLS        | CGREFF       | CDV          |   |    |               | IEKRNGKSKKEE                           | VGKK                 | CPV   | C   | 46 |    |
| Bra0440045-C2  | CKTC                                          | GKVKHKNCKSWAQIRDLPHSWSW |                   | CPS        | CRV          | CEV          |   |    | R             | RTGDEN                                 | KFVE                 | CKR   | C   | 54 |    |
| Bra0405461a-D  | CPVC                                          | LGLLIPKNV               | VIKV-LFN          | CK         | HMF          | DEE          |   |    | IGR           | WL                                     | ESH                  | VT    | CPF | C  | 42 |
| Bra0405461b-D  | CPVC                                          | LRLIPKNV                | VIKV-LFN          | CK         | HMF          | DEE          |   |    | IGR           | WL                                     | ETH                  | VT    | CPF | C  | 42 |
| Bra0416527-D   | CTIC                                          | LEEFKSG                 | VNVE-LP           | CG         | HEF          | DDA          |   |    | IGH           | WF                                     | ETN                  | HI    | CPI | C  | 41 |
| Bra0418733-D   | CTIC                                          | LEEFKSG                 | GRVPE-LA          | CG         | HEF          | DEE          |   |    | IVK           | WF                                     | ETN                  | HV    | CPI | C  | 41 |
| Bra0418734-D   | CTIC                                          | LEEFKSG                 | GRVPE-LP          | CG         | HEF          | DEE          |   |    | IVK           | WF                                     | ETS                  | HV    | CPI | C  | 41 |
| Bra0421889-D   | CPVC                                          | LGLLIPKNV               | VIKV-LFN          | CK         | HMF          | DEE          |   |    | IAR           | WL                                     | ESH                  | TT    | CPF | C  | 42 |
| Bra0425686-D   | CRIC                                          | LQDFNNG                 | GMVVT-LS          | CG         | HEF          | DDE          |   |    | IVK           | WF                                     | ETS                  | HV    | CPI | C  | 41 |
| Bra0438122-D   | CTIC                                          | LQDFNNG                 | ATVVT-LP          | CA         | HDF          | DDE          |   |    | IVK           | WF                                     | EIN                  | IL    | CPF | C  | 41 |
| Bra0438126-D   | CNAC                                          | WREL-CGRA               | IS-TT             | CG         | HLL          | CTE          |   |    |               | -ASKILSND                              | GA                   | CPI   | C   | 39 |    |
| Bra0439674-D   | CNAC                                          | WREL-EGRA               | IS-TT             | CG         | HLL          | CTE          |   |    |               | -ASKILSND                              | GA                   | CPF   | C   | 39 |    |
| Bra0406028-S/T | CPVS                                          | REQSDVYNNP              | MM-MP             | CR         | HVL          | CKE          |   |    | IL            | RL                                     | SK                   | CLC   | C   | 35 |    |
| Bra0410618-S/T | CPVS                                          | KEQASDNPP               | MM-MS             | CG         | HVL          | CKQ          |   |    |               | INMKSNG                                | AKS                  | SFK   | CPY | C  | 45 |
| Bra0411793-S/T | CPVS                                          | KEQASDNPP               | MM-MS             | CG         | HVL          | CKQ          |   |    |               | ITRMSNG                                | AKT                  | SFK   | CPY | C  | 45 |
| Bra0416972-S/T | CFIC                                          | HETLRNGKM               | VFQ               | CG         | HST          | CCFF         |   |    |               | MTERGS                                 | VHETMRKVVW           | CPI   | C   | 46 |    |
| Bra0438613-S/T | CFIC                                          | LERLIDP                 | DTSGILS-TL        | CD         | HSPQ         | CSC          |   |    |               | SKWTY                                  | LS                   | CDV   | C   | 40 |    |
| Bra0428834-G   | CLIC                                          | MERVINGDDHQ             | VCC-LP            | CG         | HLY          | GFS          |   |    | IKK           | WL                                     | KQP                  | RSACK | CPQ | C  | 46 |

**Figure S6** Phylogenetic tree based on multiple sequence alignment of 731 *B. rapa* RING domains. The percentage of replicate trees in which the associated taxa clustered together in the bootstrap test (1000 replicates) are shown next to the branches. The evolutionary distances were computed using the Poisson correction method and are in the units of the number of amino acid substitutions per site.

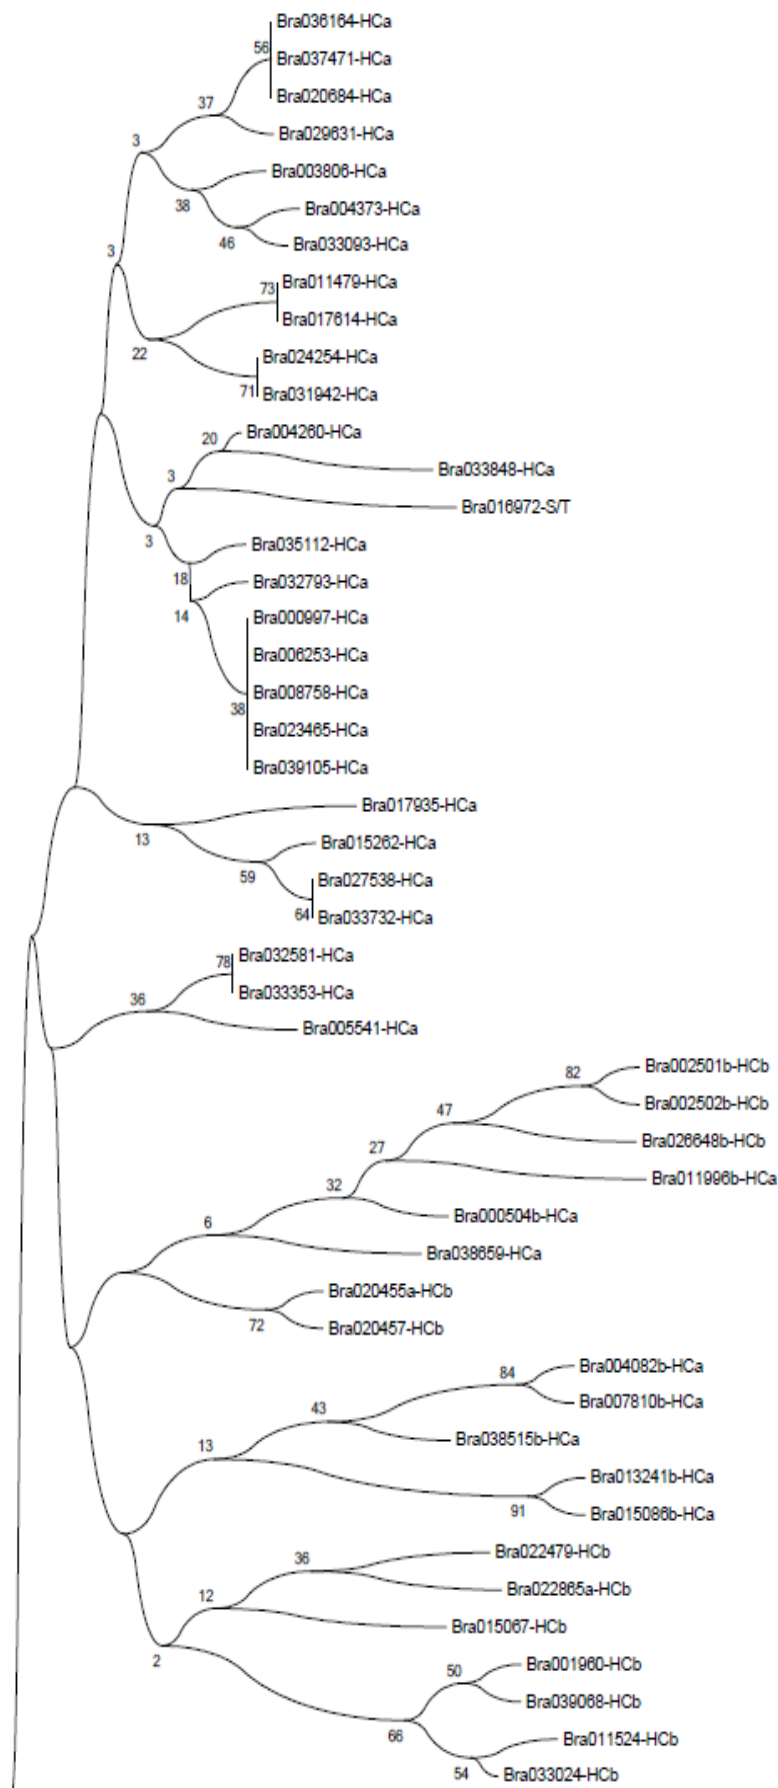

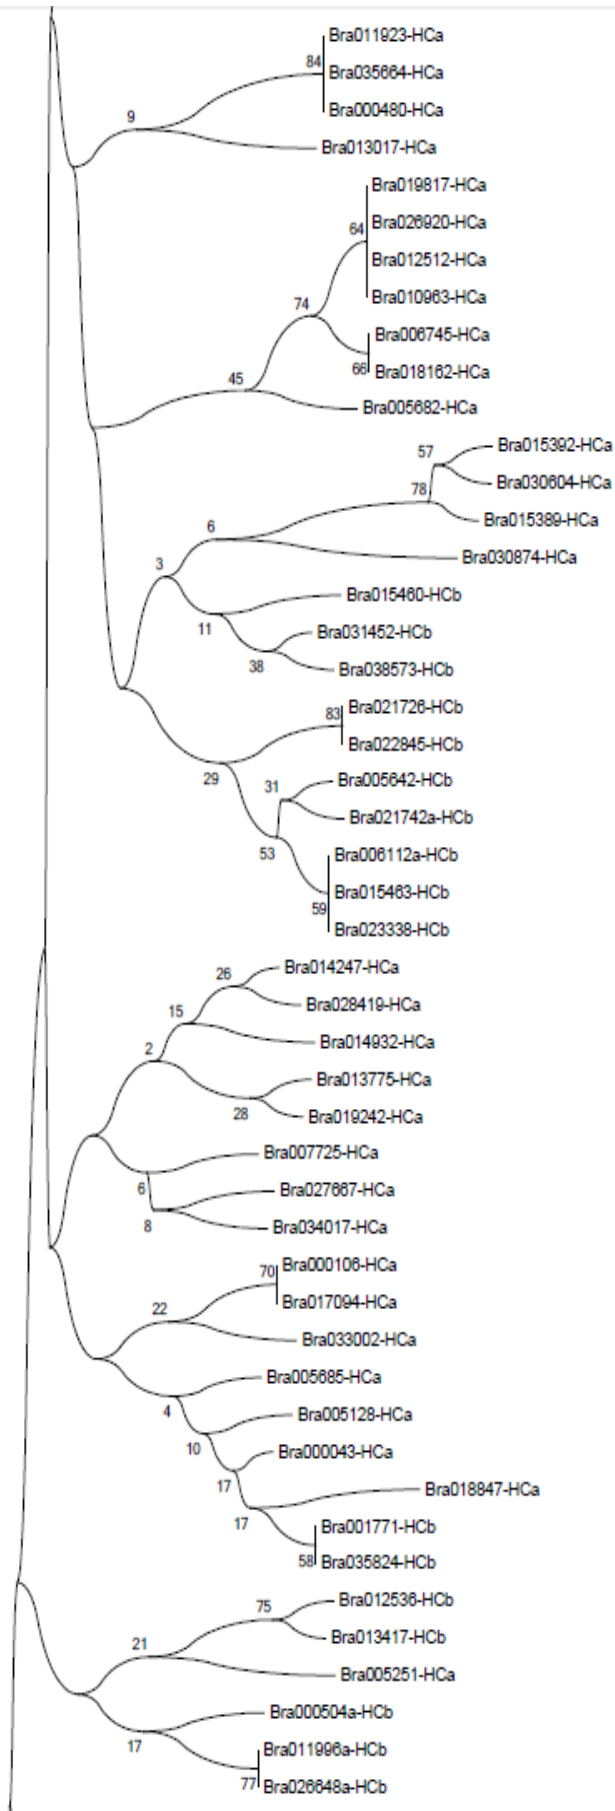



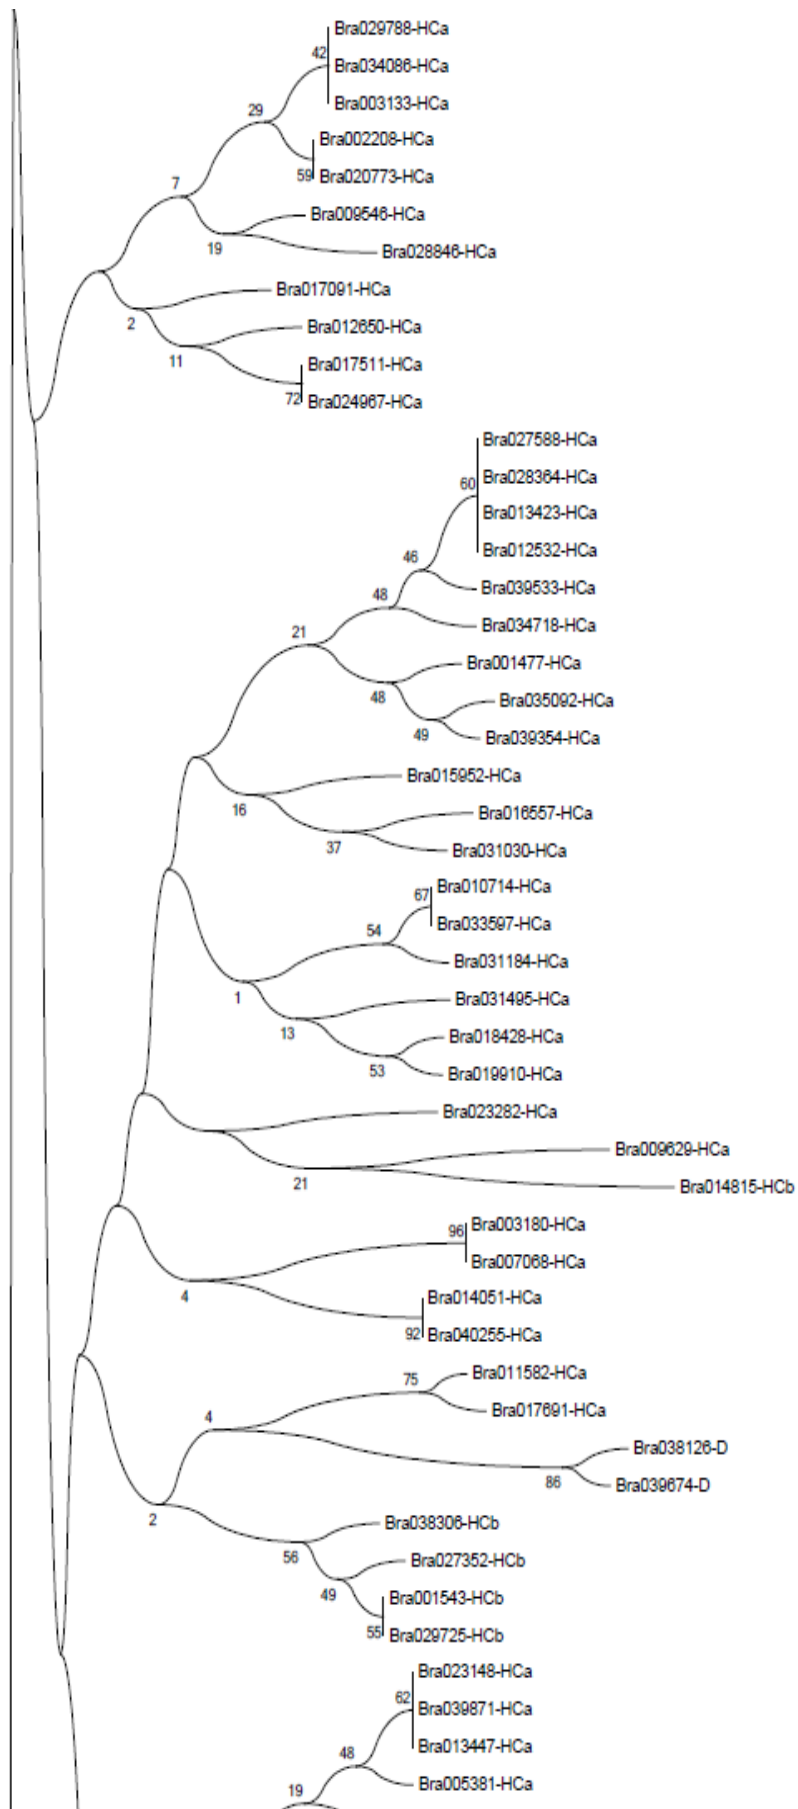

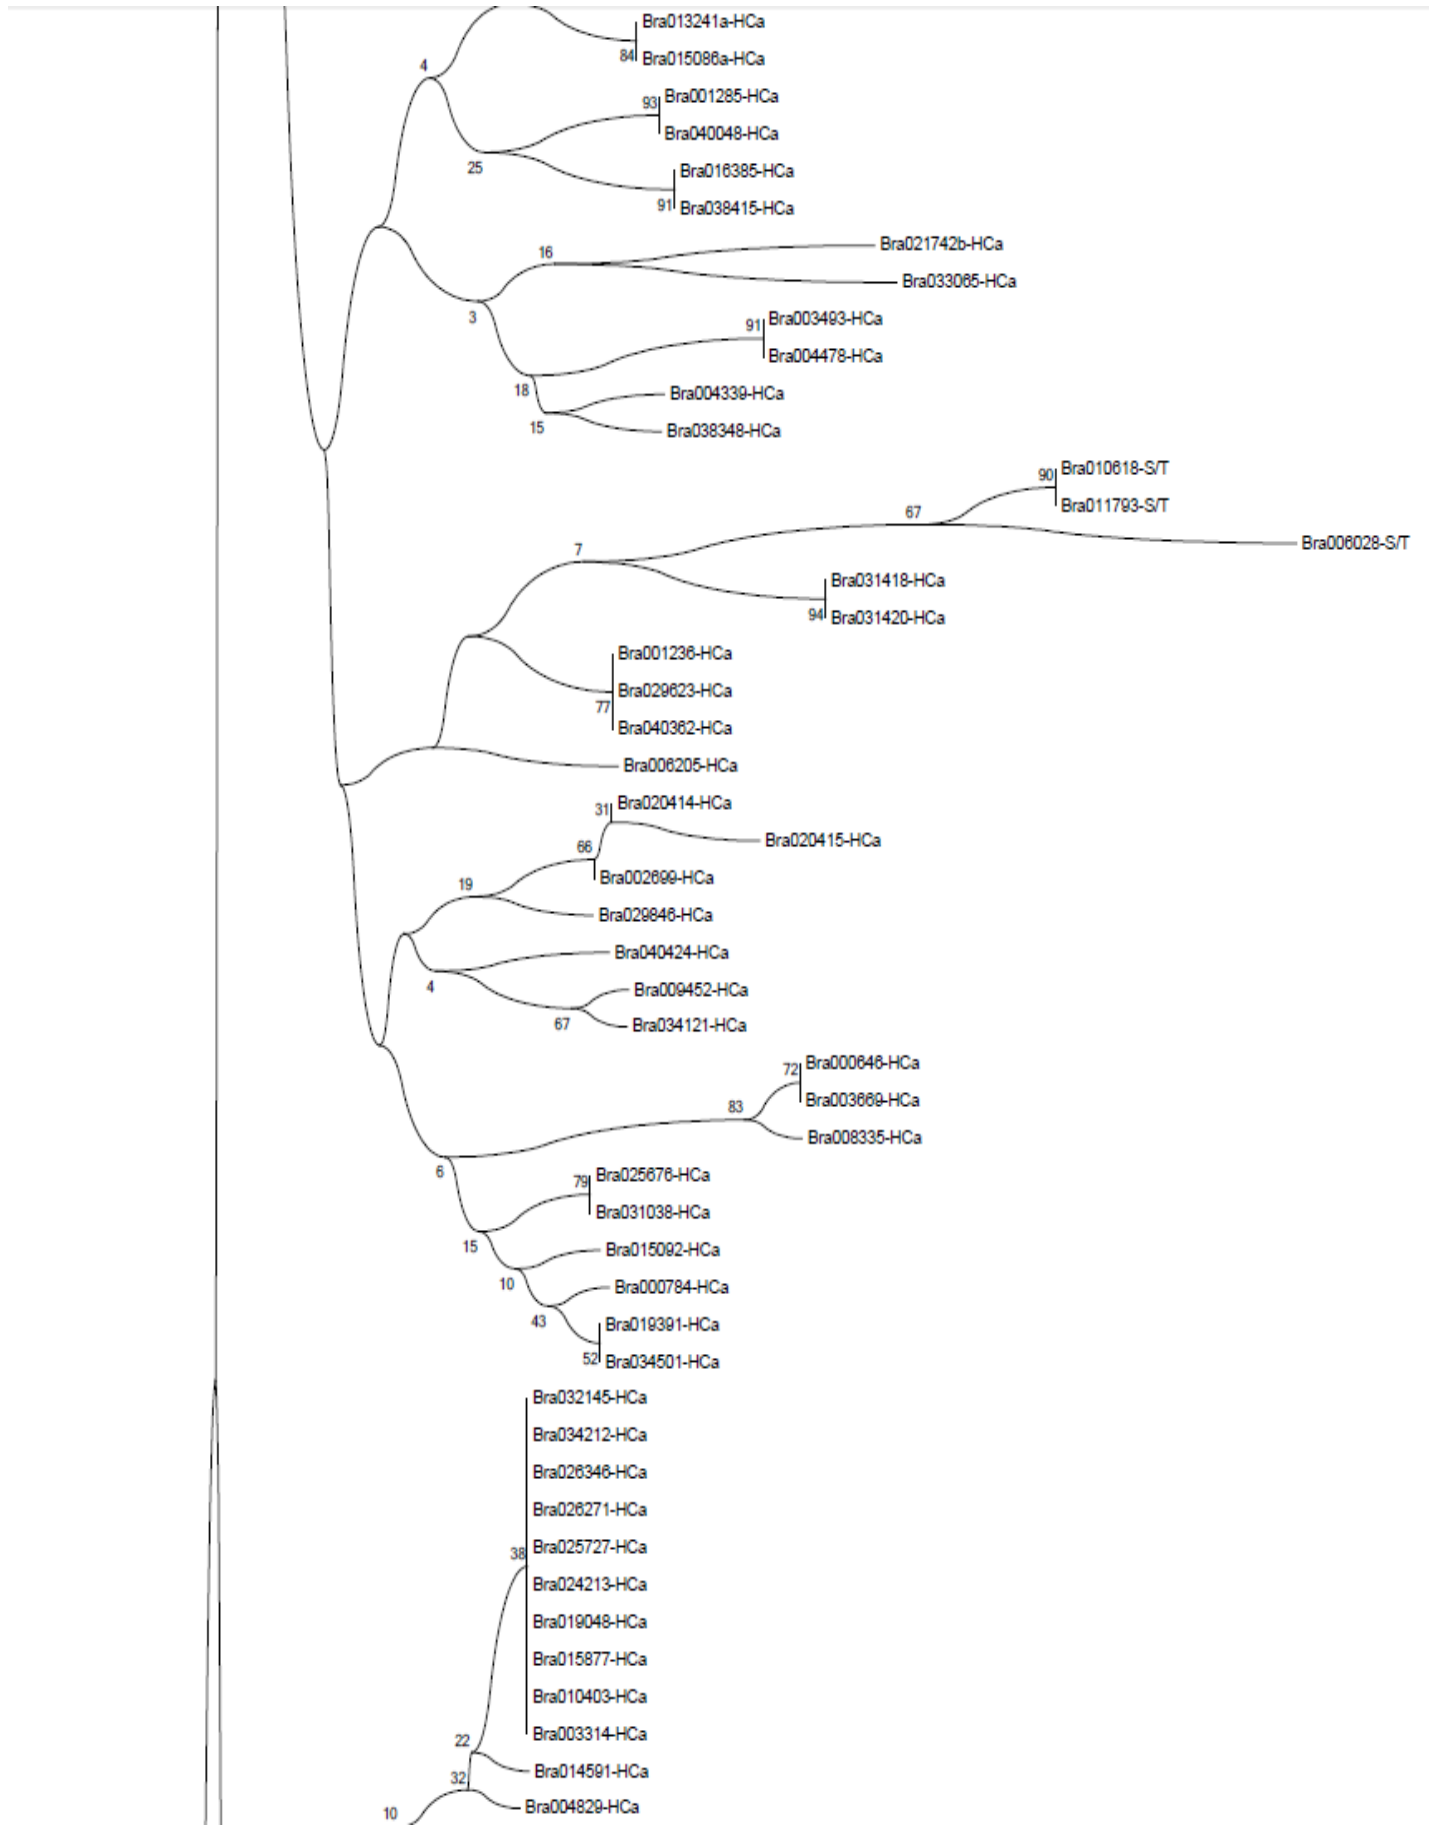

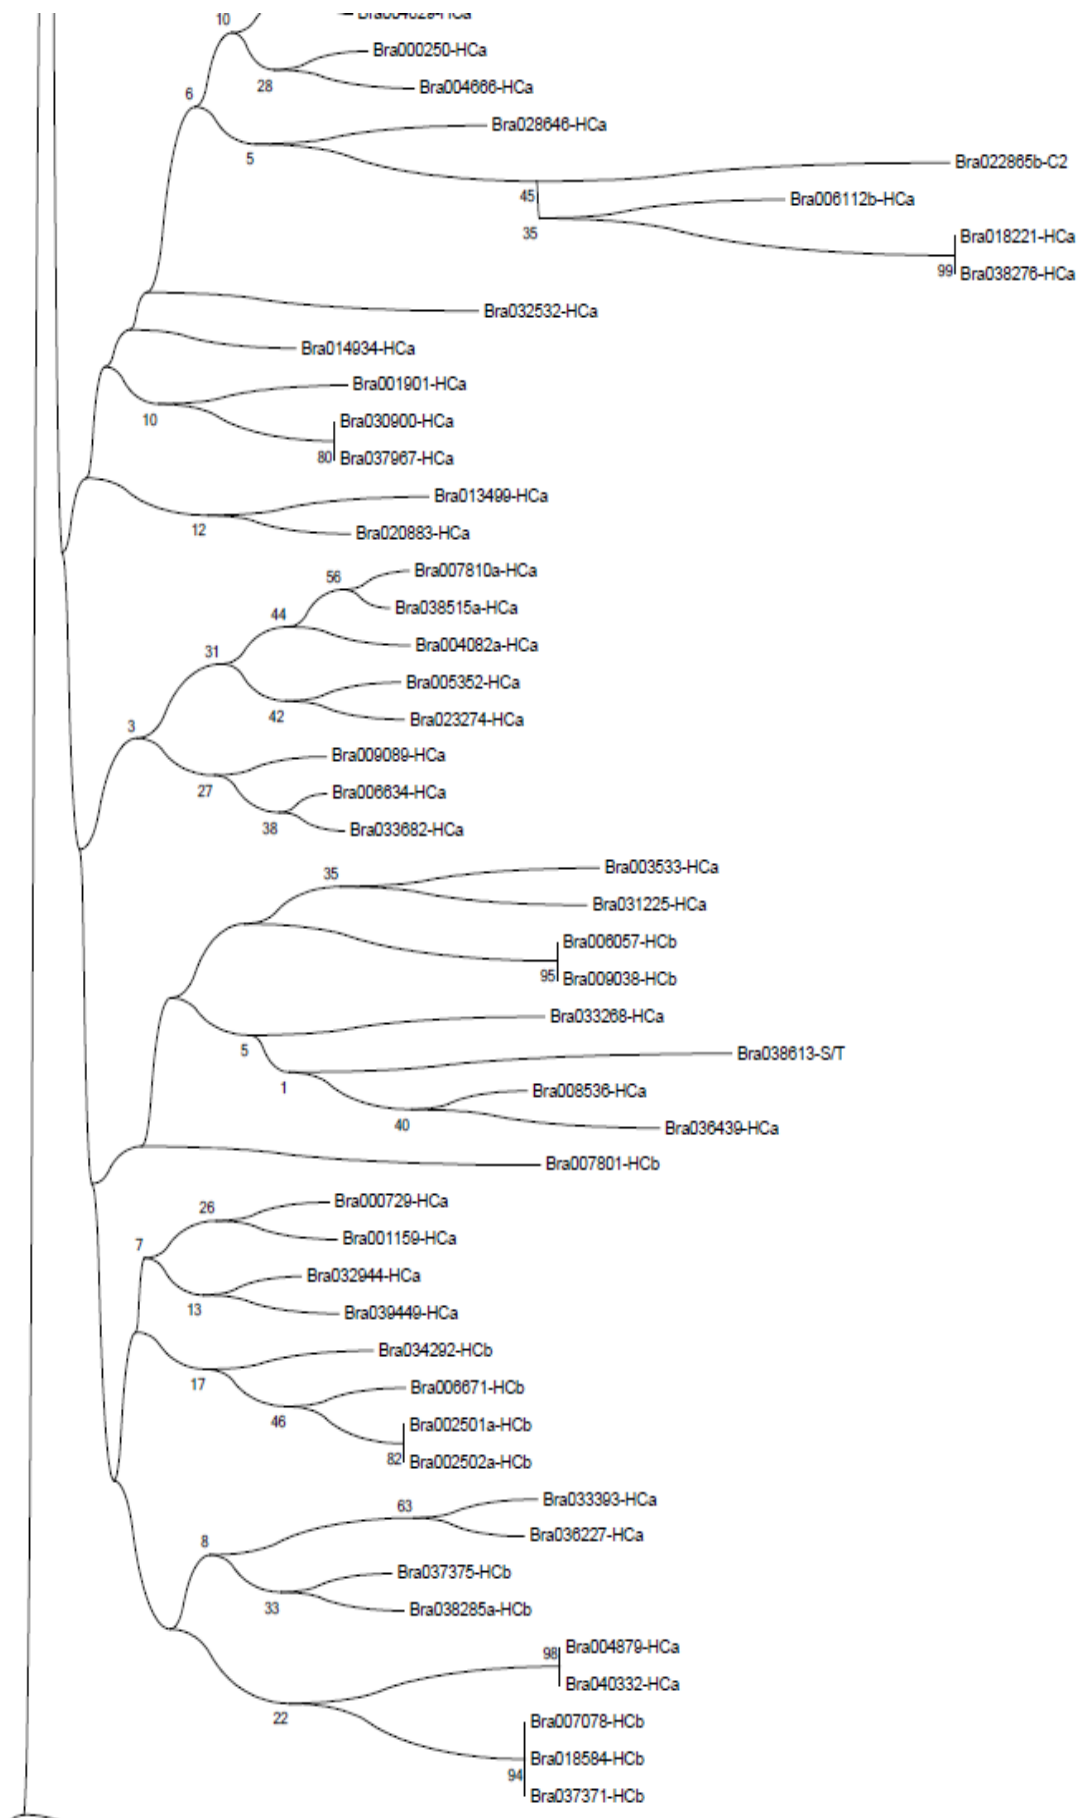

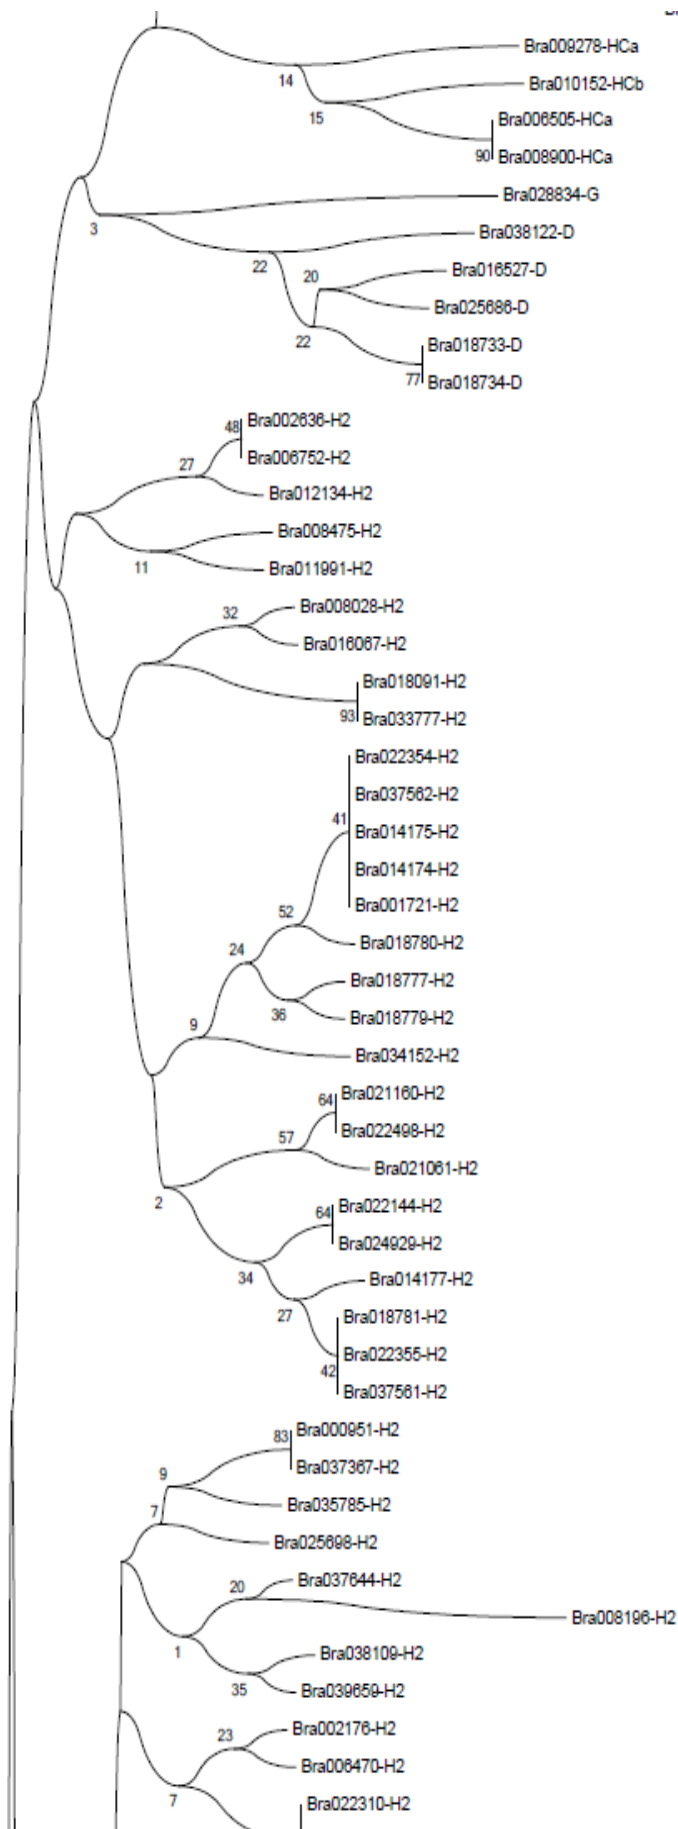

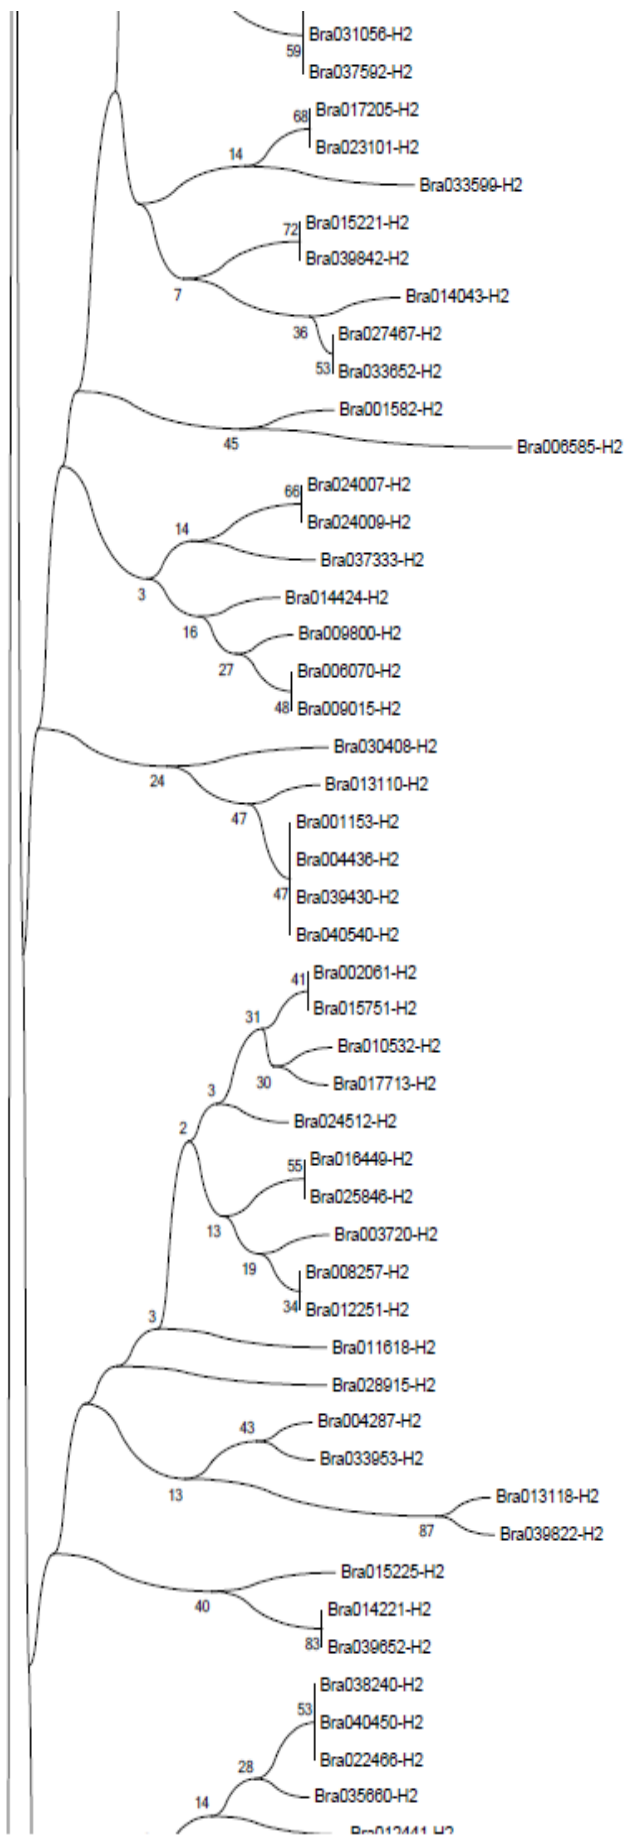

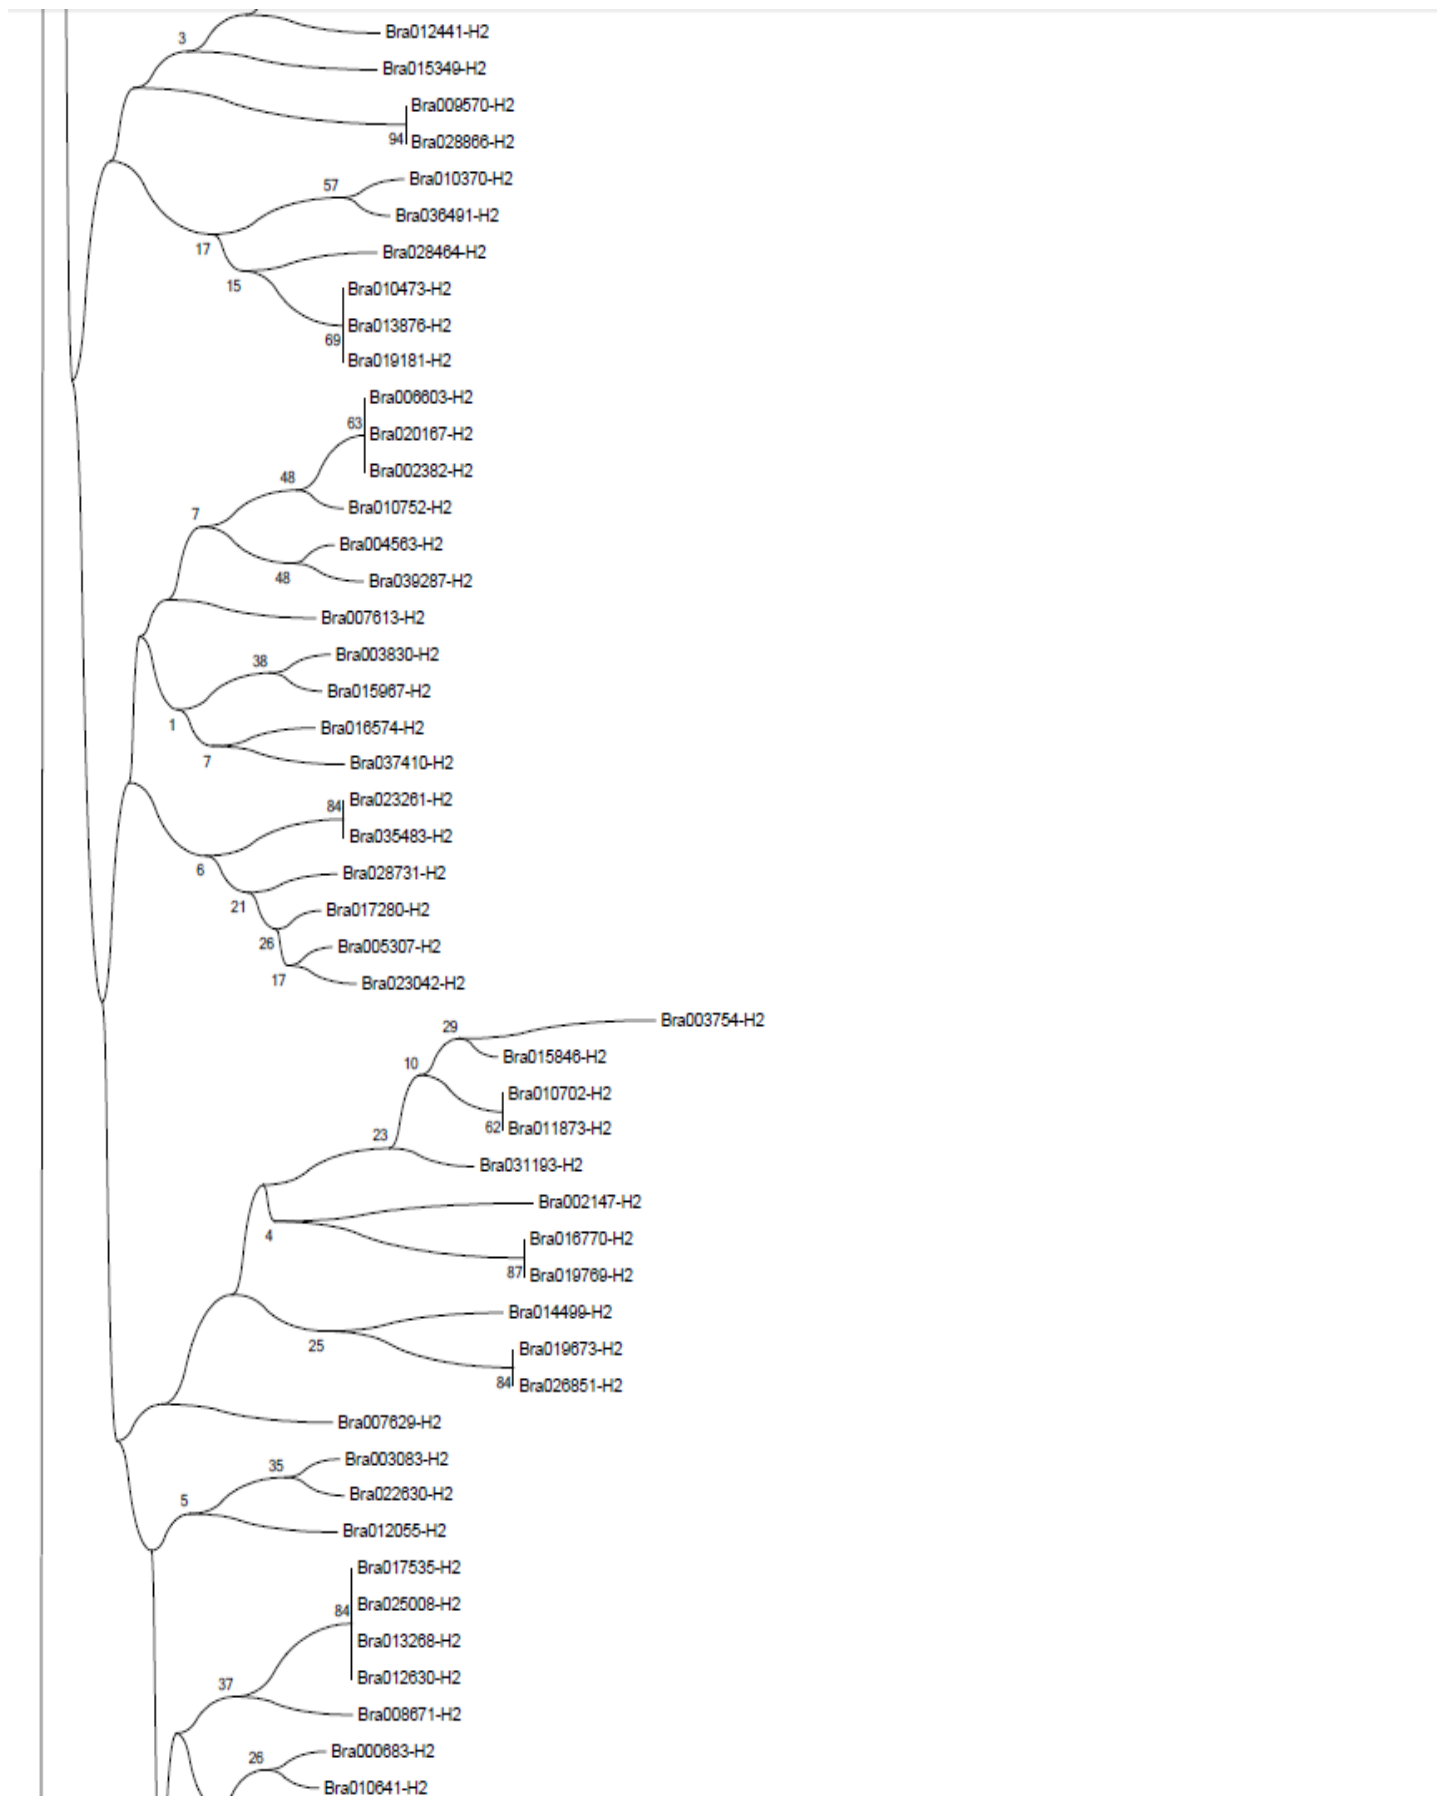

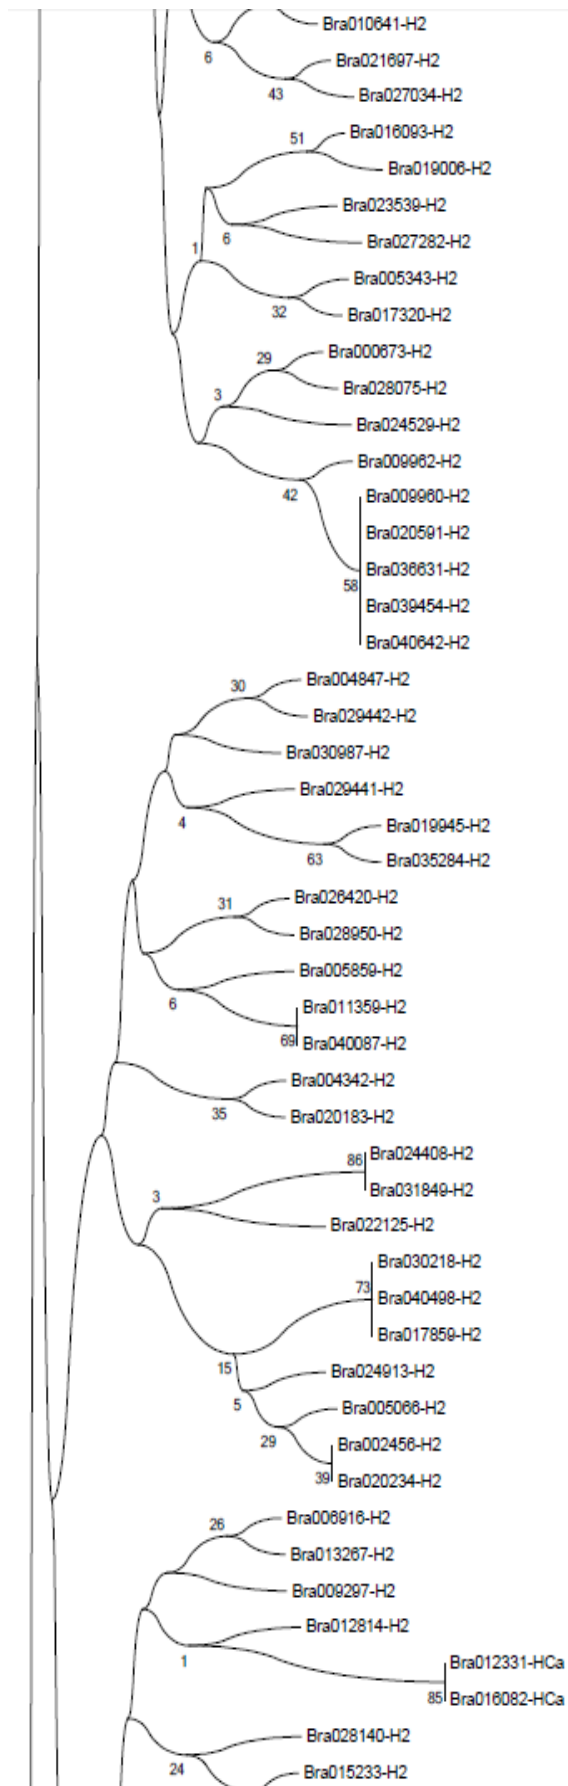

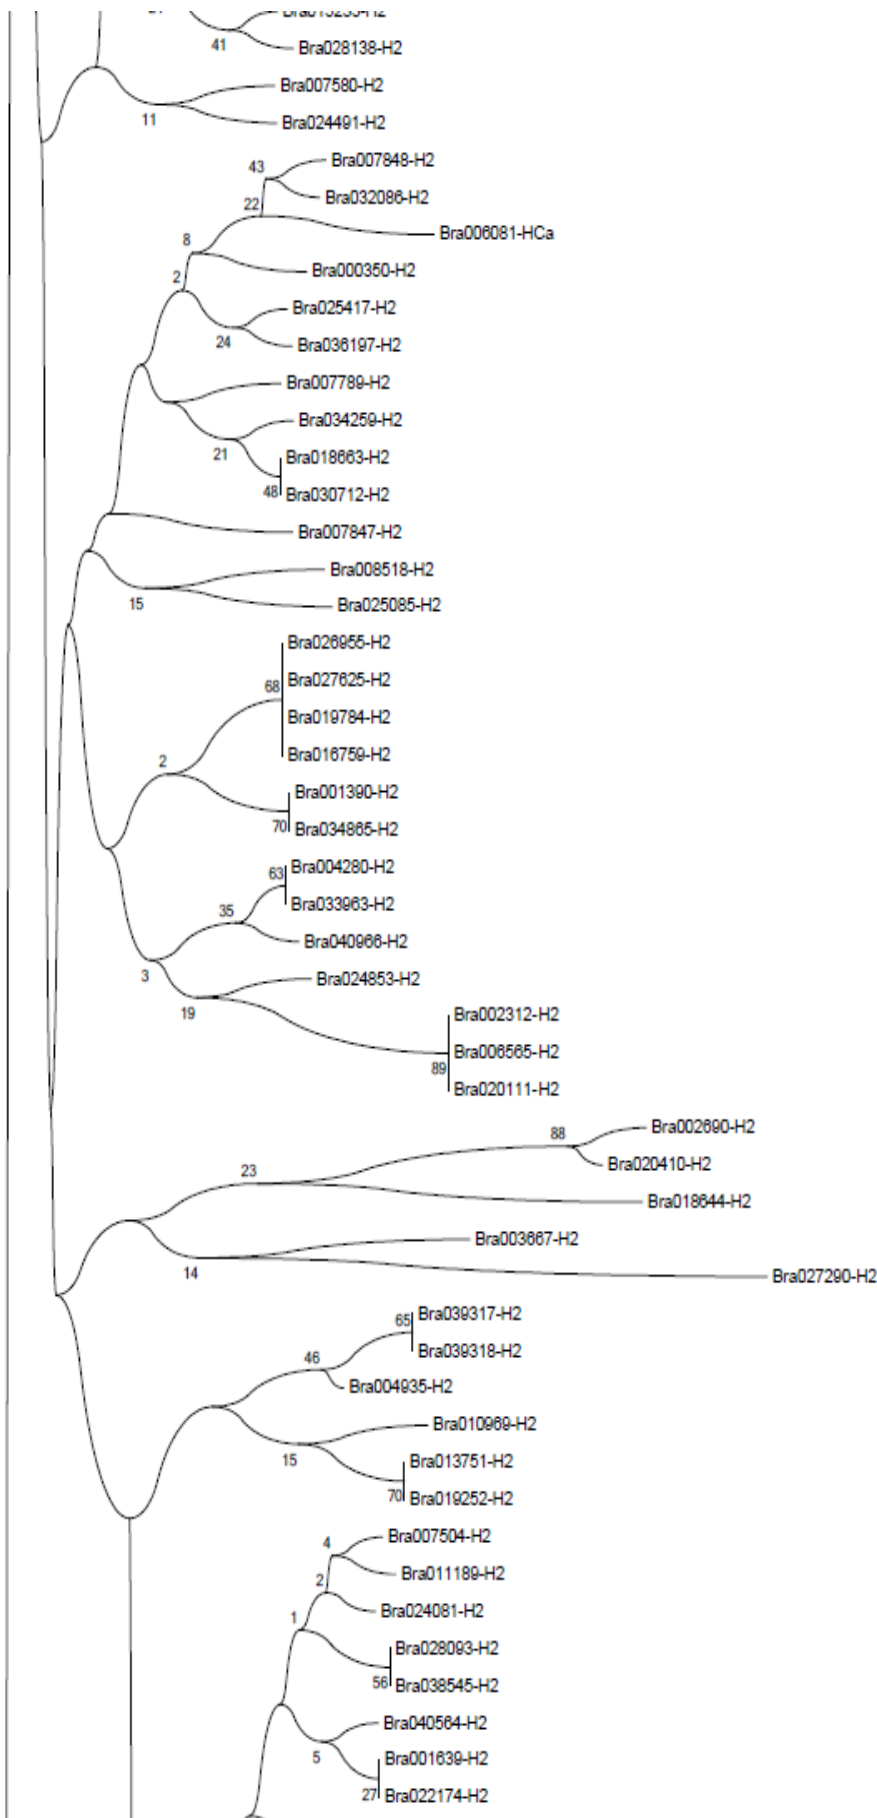



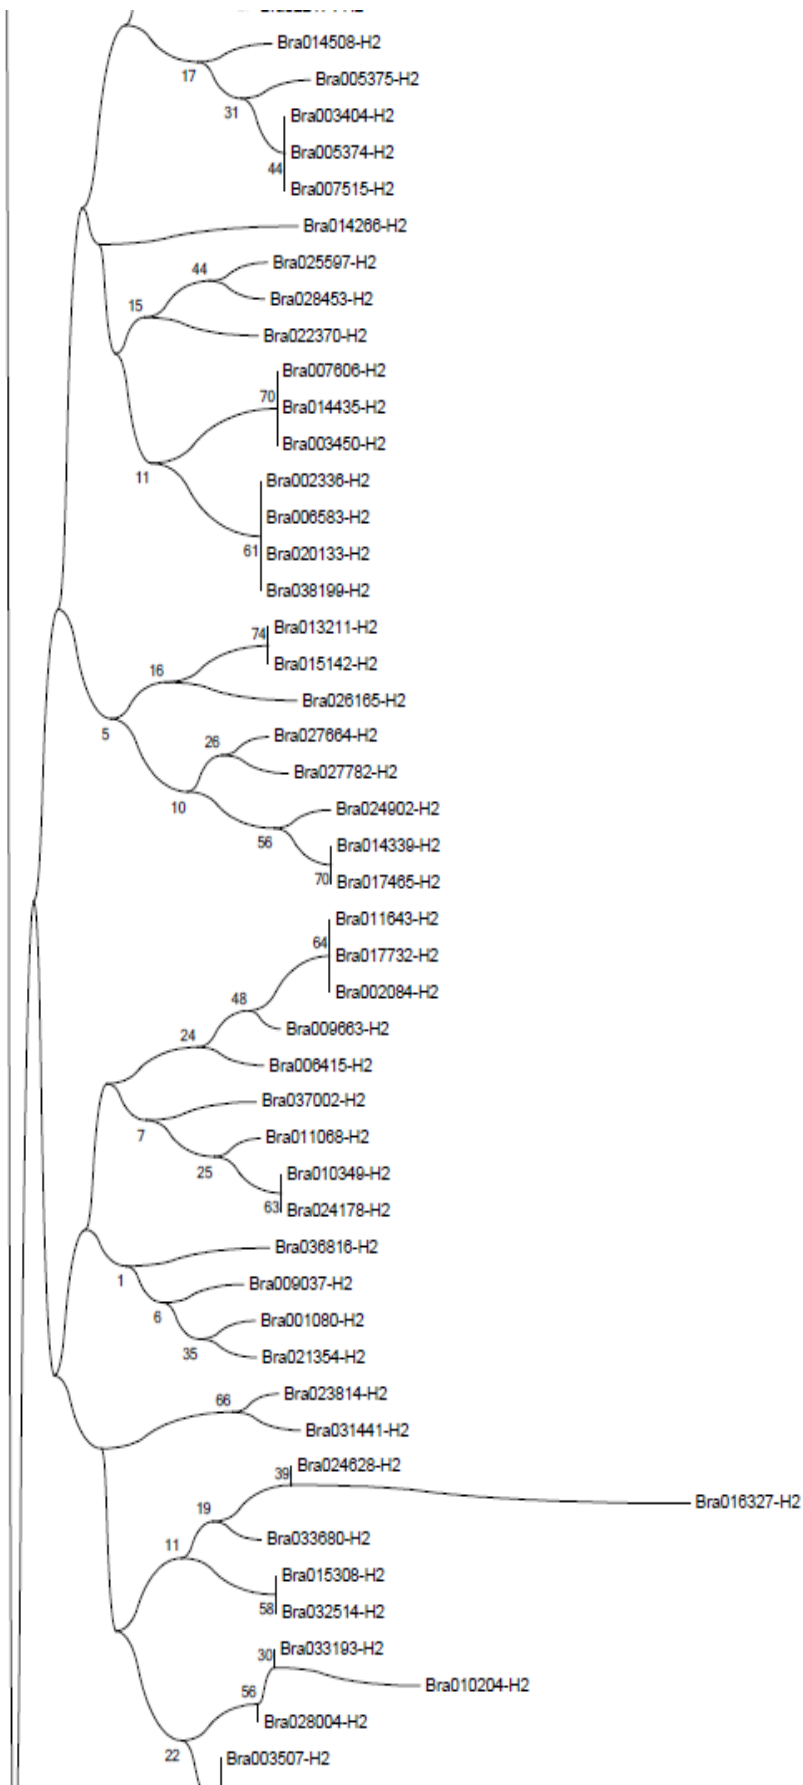

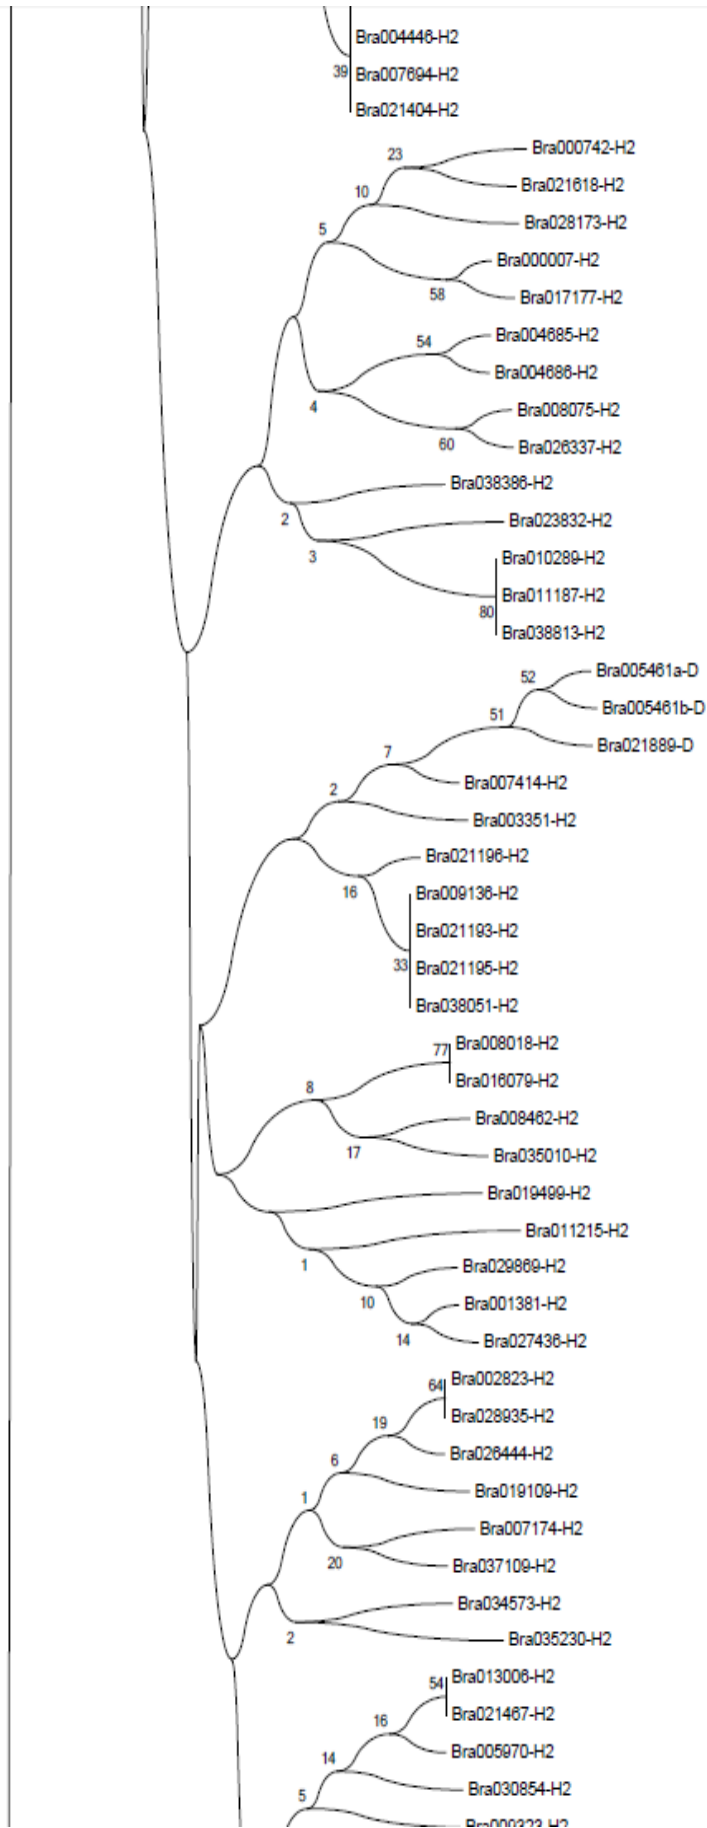

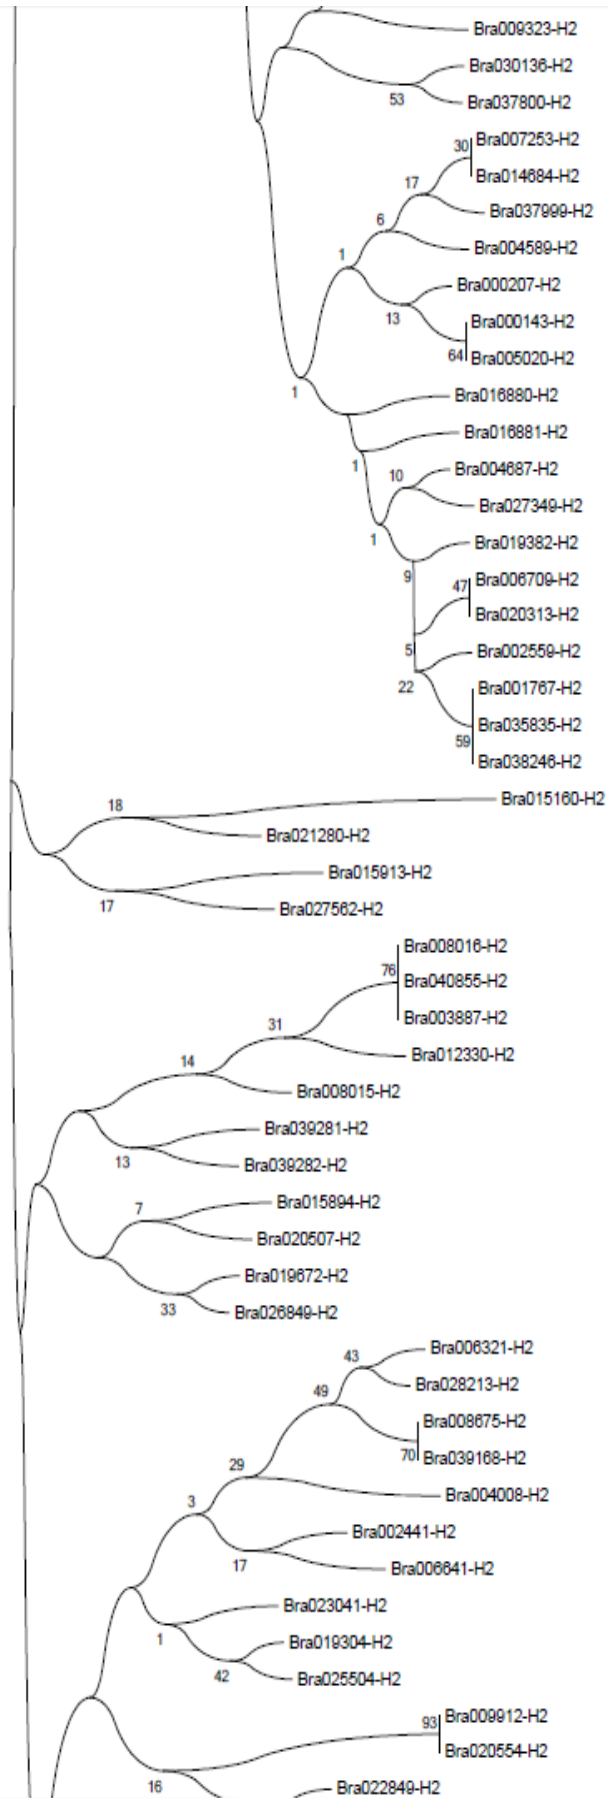

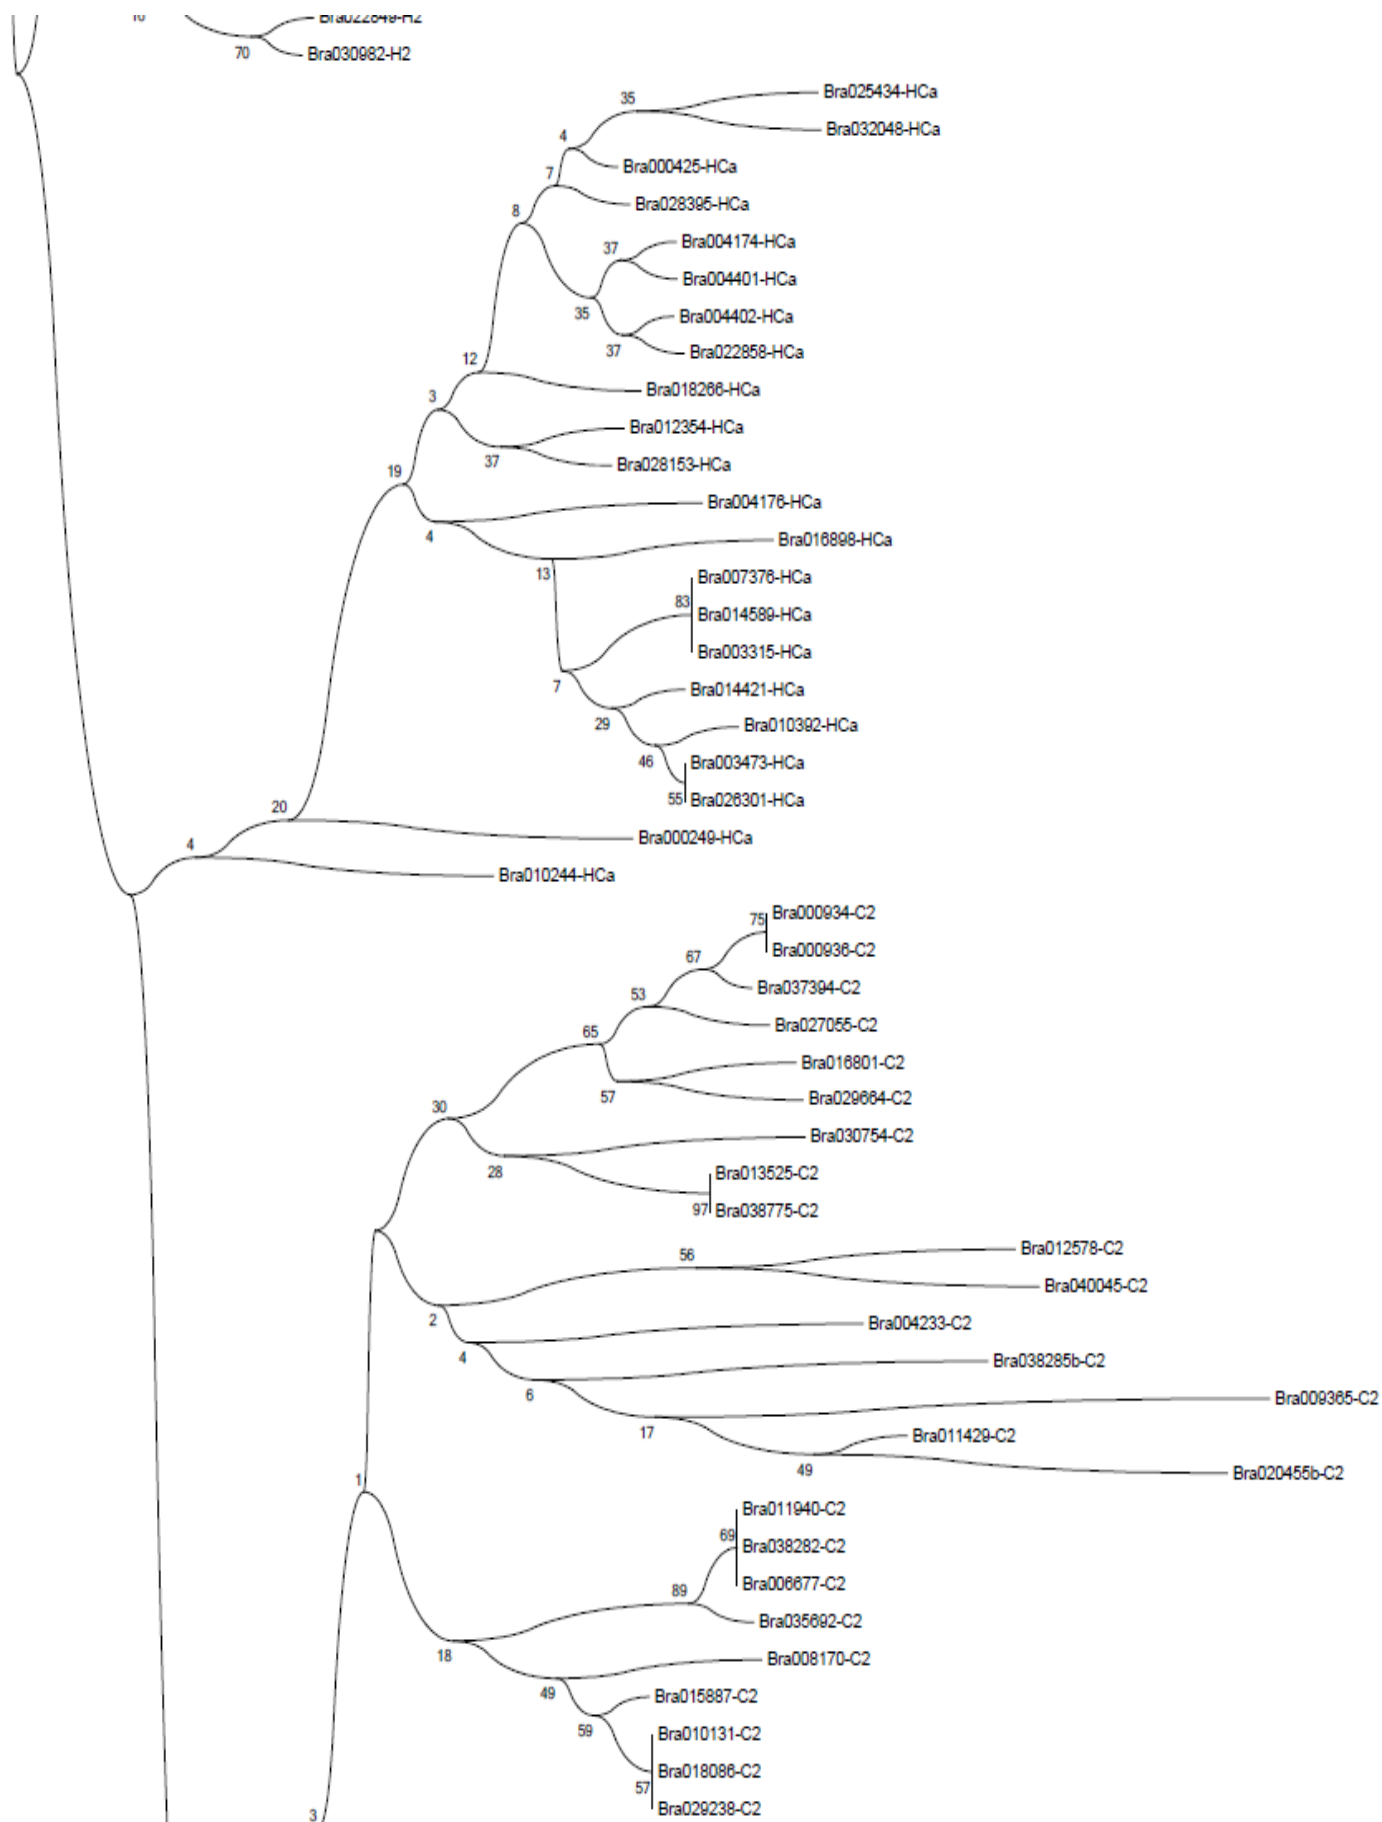

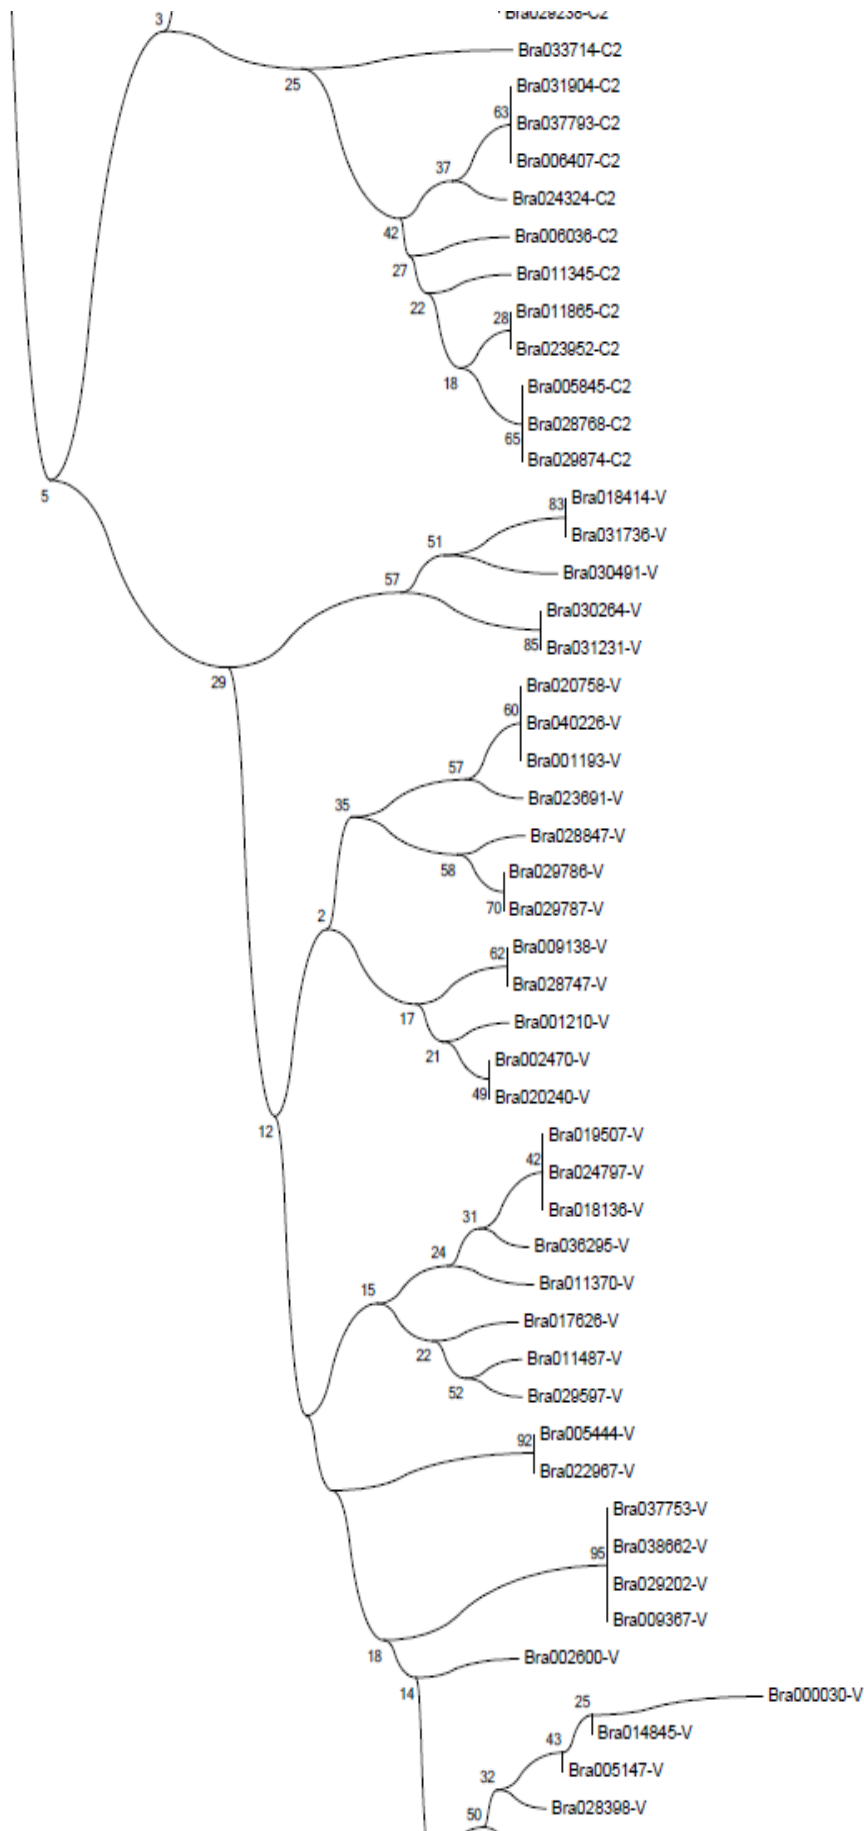

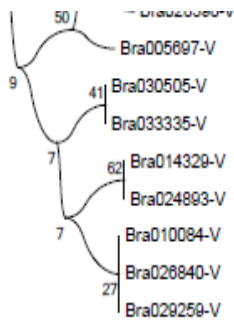

**Figure S7** Expression profile of 667 RING finger protein genes in *B. rapa*, subdivided into groups (I-VII). The scale indicating the relative expression signal values is shown above.

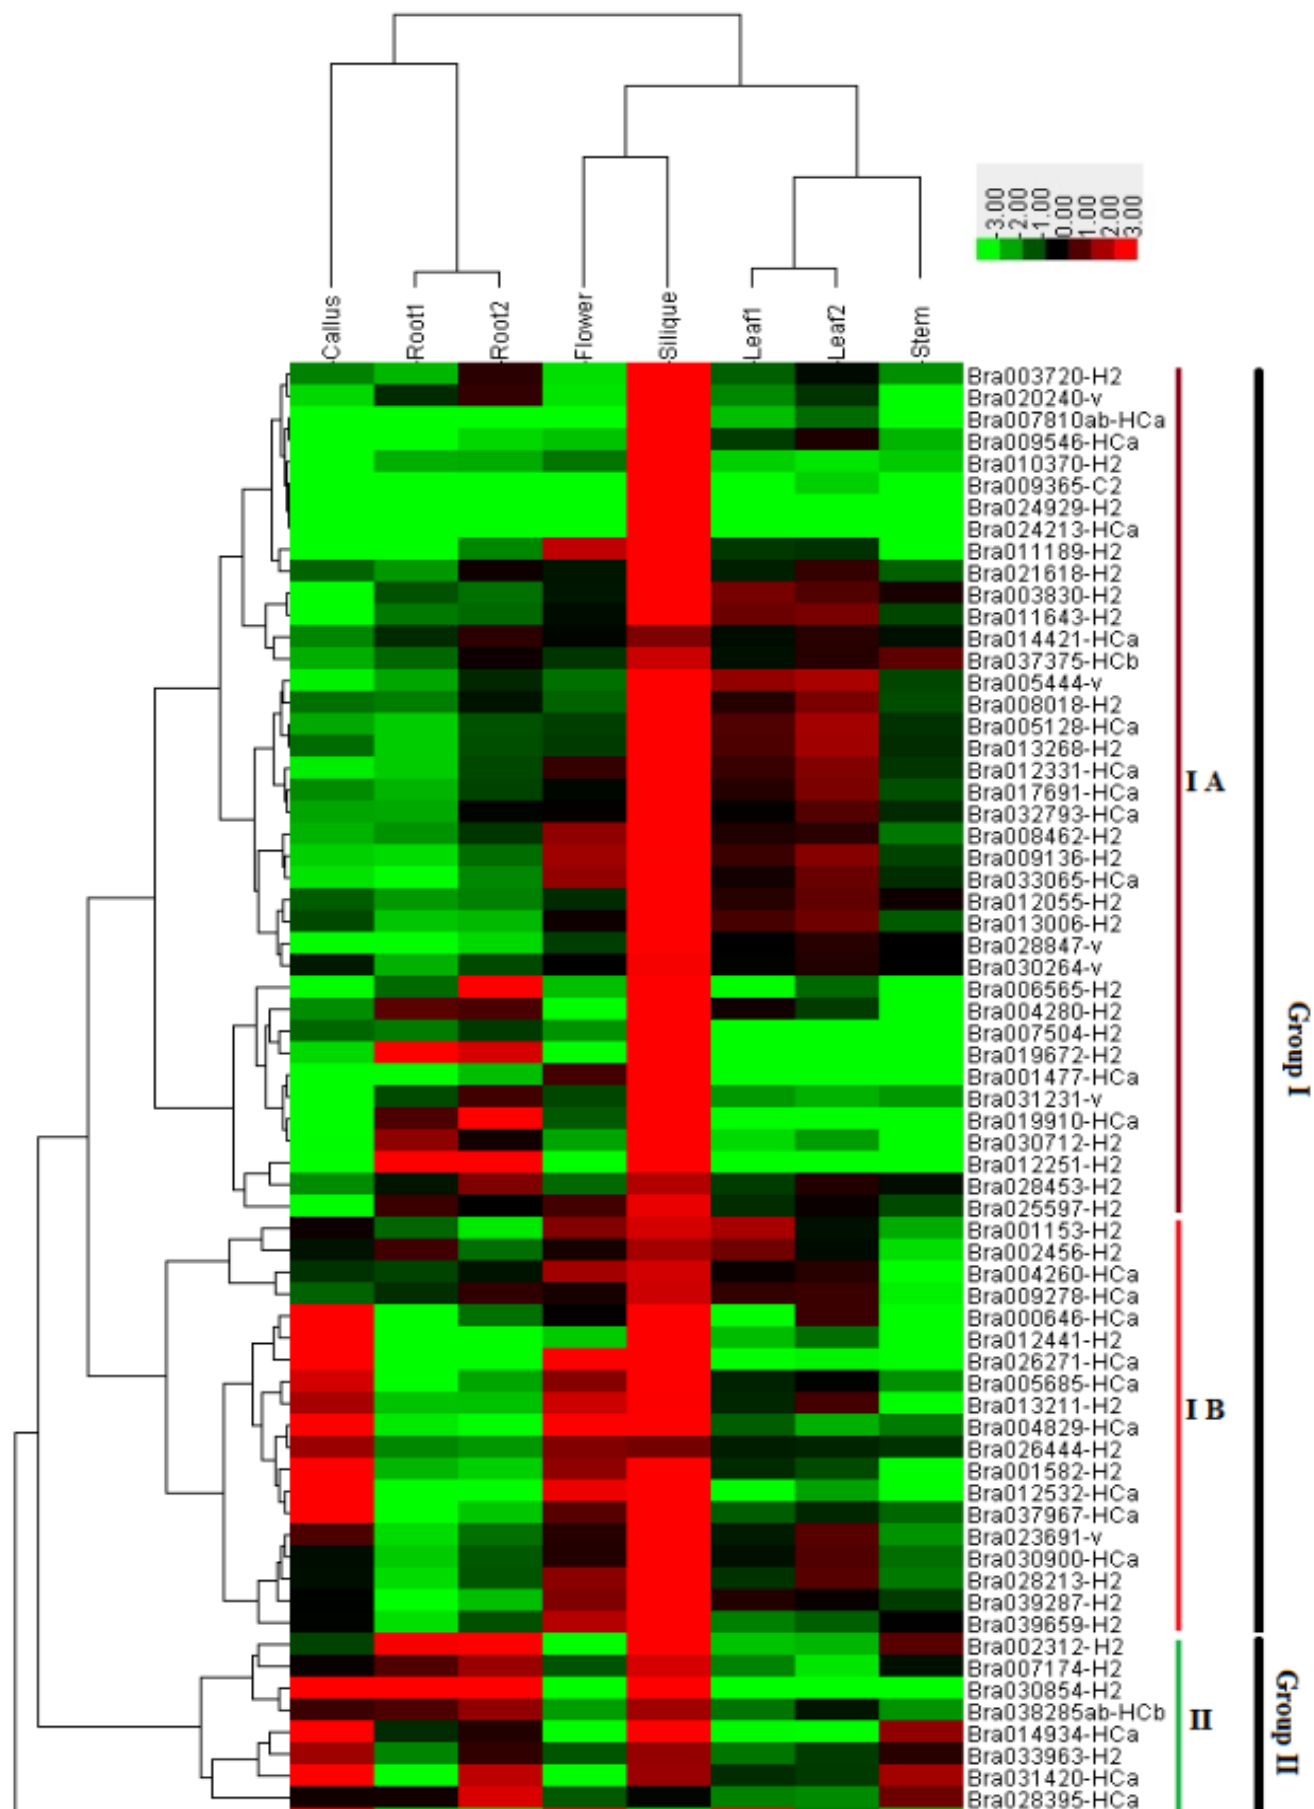

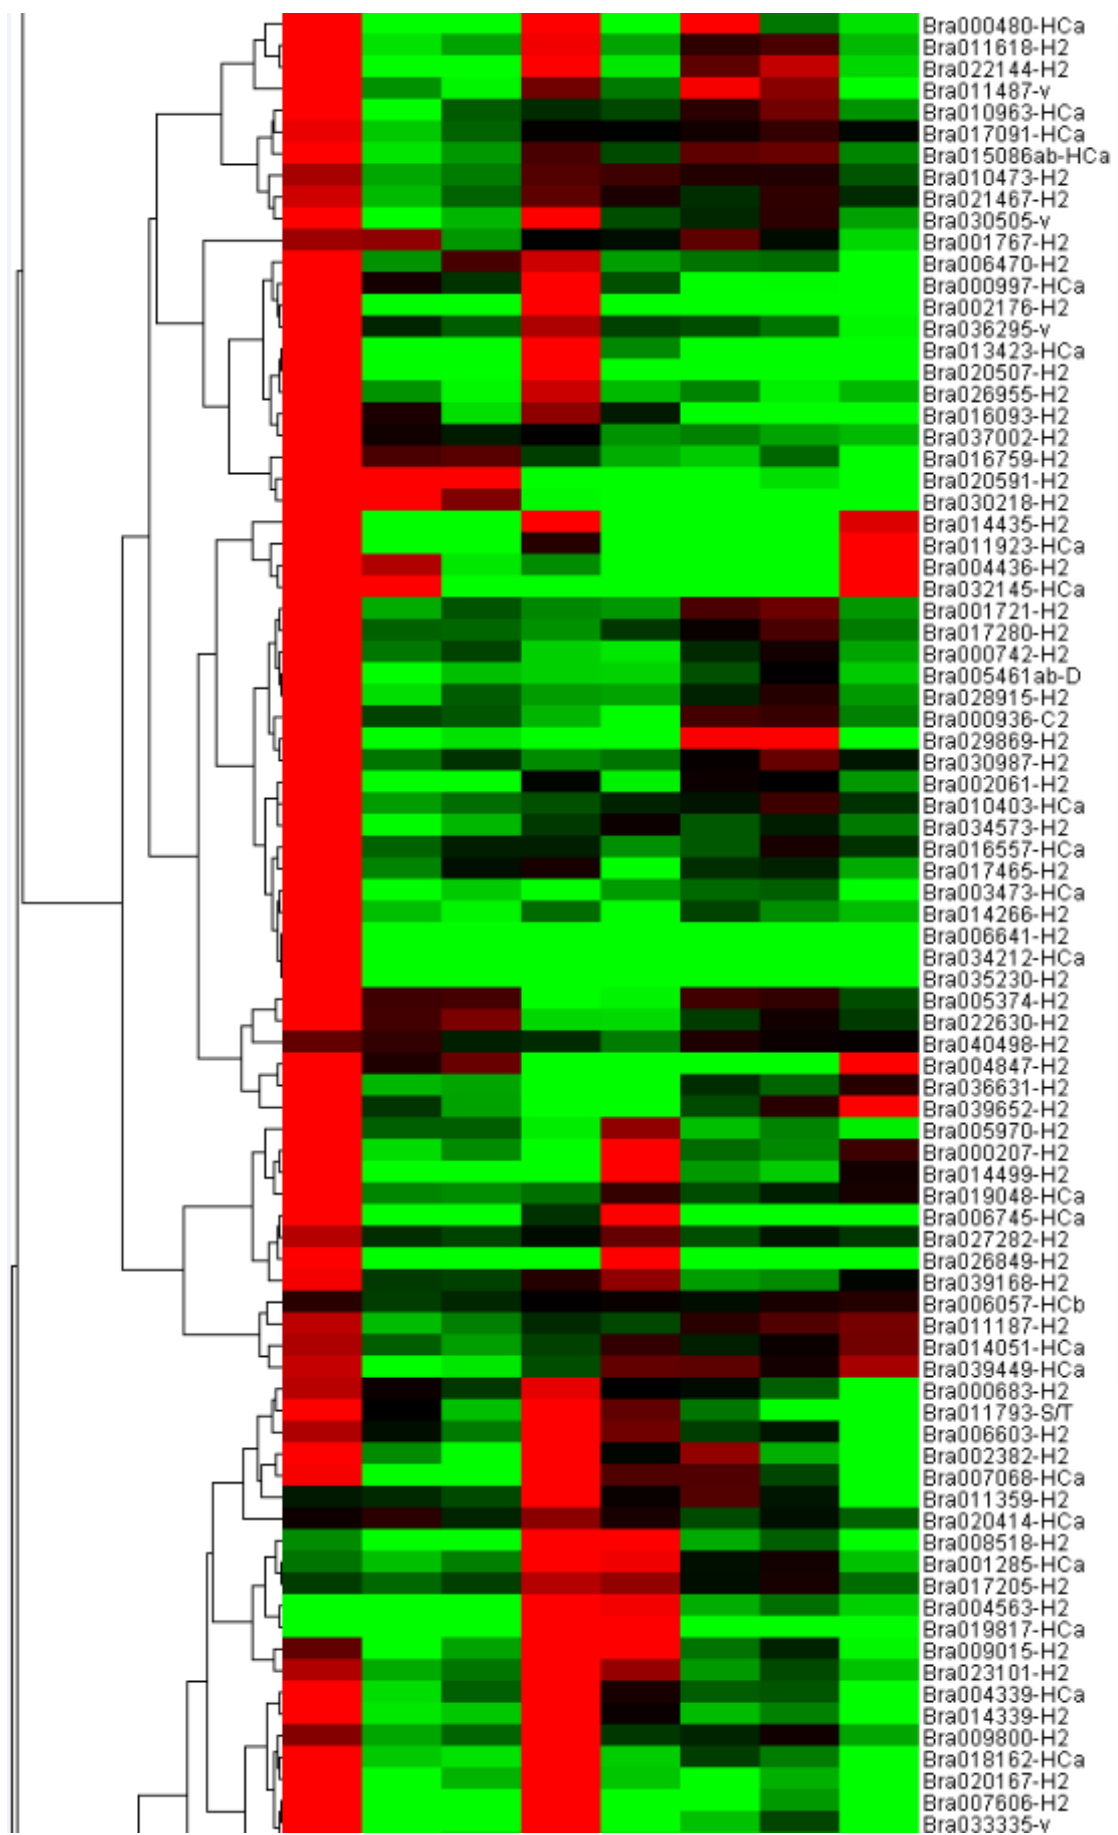

Bra000480-HCa  
 Bra011618-H2  
 Bra022144-H2  
 Bra011487-v  
 Bra010963-HCa  
 Bra017091-HCa  
 Bra015086ab-HCa  
 Bra010473-H2  
 Bra021467-H2  
 Bra030505-v  
 Bra001767-H2  
 Bra006470-H2  
 Bra000997-HCa  
 Bra002176-H2  
 Bra036295-v  
 Bra013423-HCa  
 Bra020507-H2  
 Bra026955-H2  
 Bra016093-H2  
 Bra037002-H2  
 Bra016759-H2  
 Bra020591-H2  
 Bra030218-H2  
 Bra014435-H2  
 Bra011923-HCa  
 Bra004436-H2  
 Bra032145-HCa  
 Bra001721-H2  
 Bra017280-H2  
 Bra000742-H2  
 Bra005461ab-D  
 Bra028915-H2  
 Bra000936-C2  
 Bra029869-H2  
 Bra030987-H2  
 Bra002061-H2  
 Bra010403-HCa  
 Bra034573-H2  
 Bra016557-HCa  
 Bra017465-H2  
 Bra003473-HCa  
 Bra014266-H2  
 Bra006641-H2  
 Bra034212-HCa  
 Bra035230-H2  
 Bra005374-H2  
 Bra022630-H2  
 Bra040498-H2  
 Bra004847-H2  
 Bra036631-H2  
 Bra039652-H2  
 Bra005970-H2  
 Bra000207-H2  
 Bra014499-H2  
 Bra019048-HCa  
 Bra006745-HCa  
 Bra027282-H2  
 Bra026849-H2  
 Bra039168-H2  
 Bra006057-HCb  
 Bra011187-H2  
 Bra014051-HCa  
 Bra039449-HCa  
 Bra000683-H2  
 Bra011793-ST  
 Bra006603-H2  
 Bra002382-H2  
 Bra007068-HCa  
 Bra011359-H2  
 Bra020414-HCa  
 Bra008518-H2  
 Bra001285-HCa  
 Bra017205-H2  
 Bra004563-H2  
 Bra019817-HCa  
 Bra009015-H2  
 Bra023101-H2  
 Bra004339-HCa  
 Bra014339-H2  
 Bra009800-H2  
 Bra018162-HCa  
 Bra020167-H2  
 Bra007606-H2  
 Bra033335-v

III

Group III

IV A



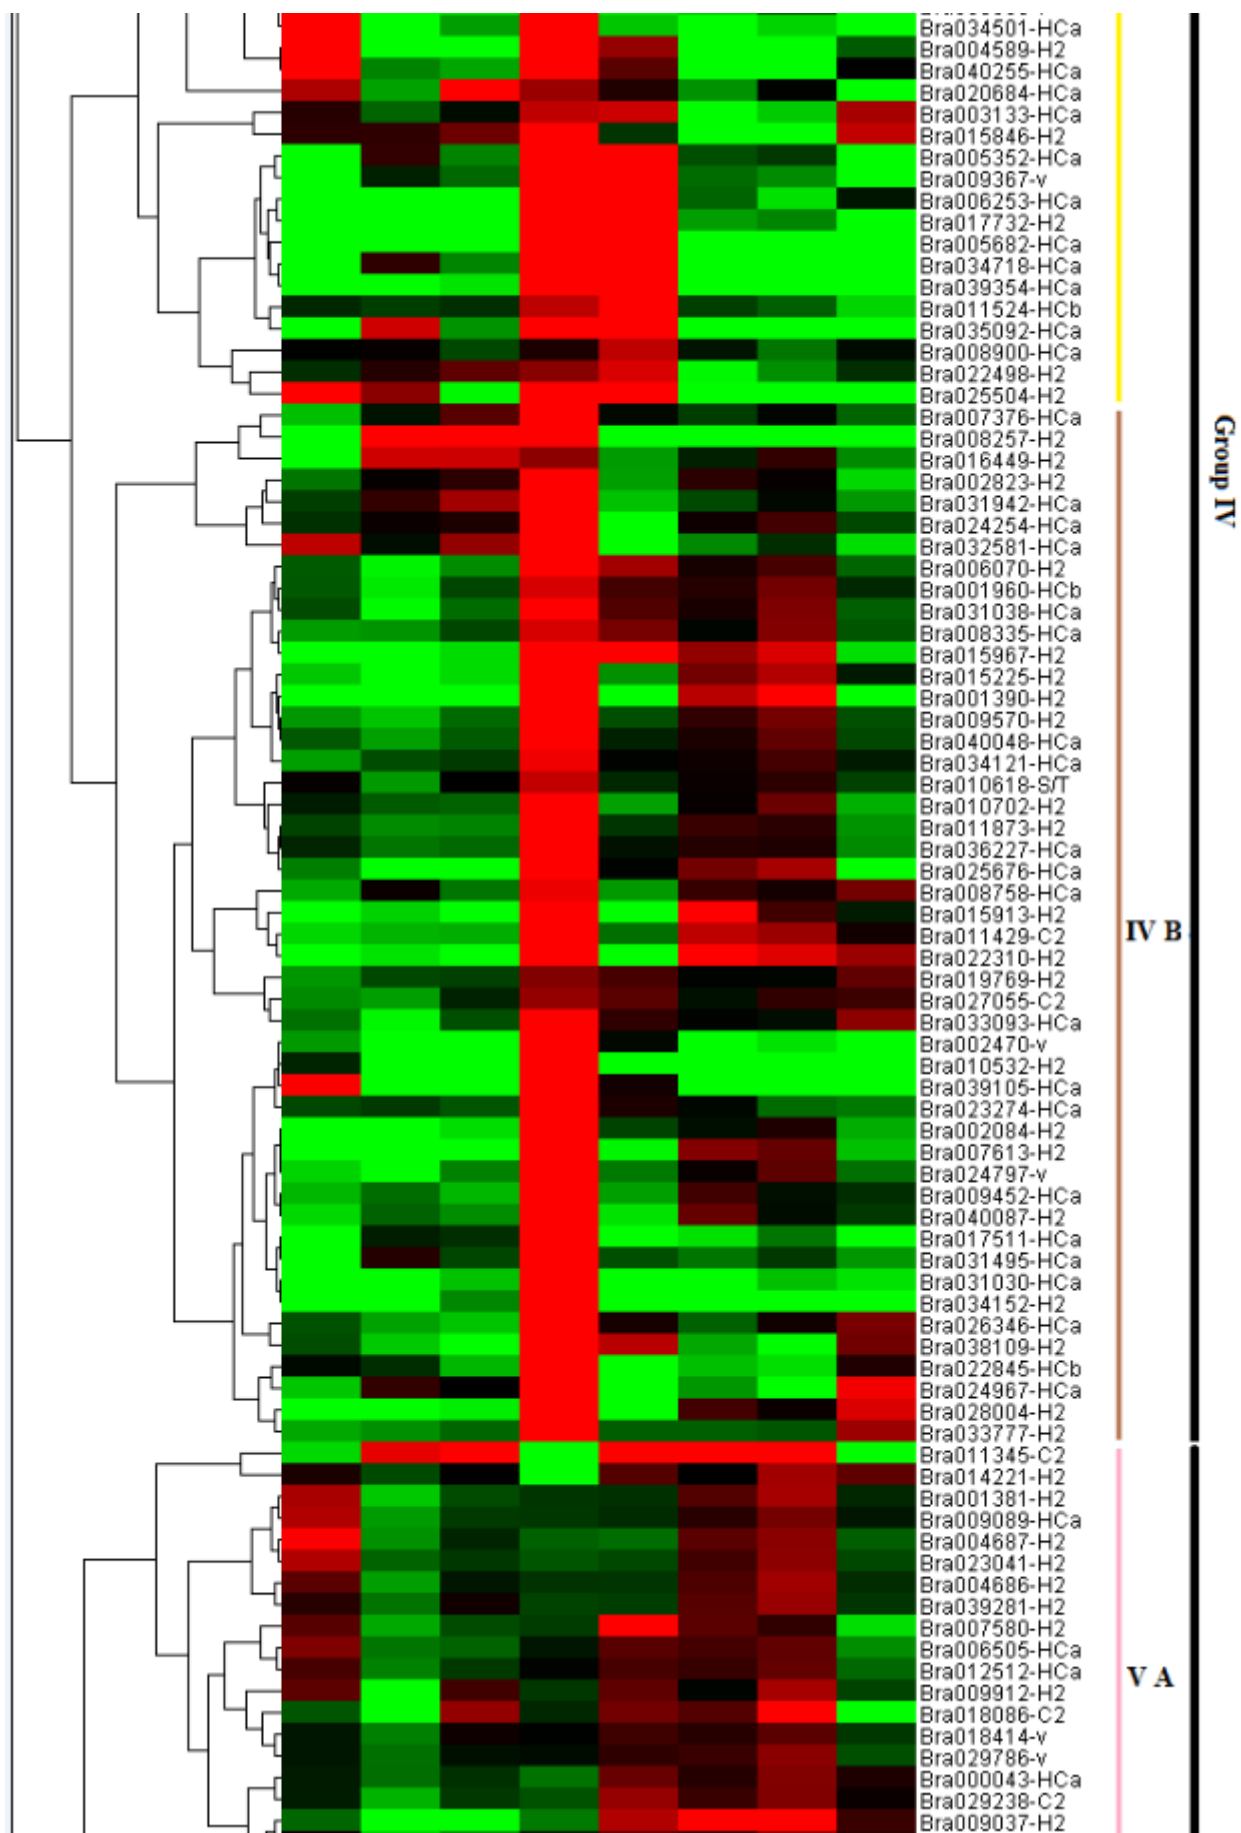

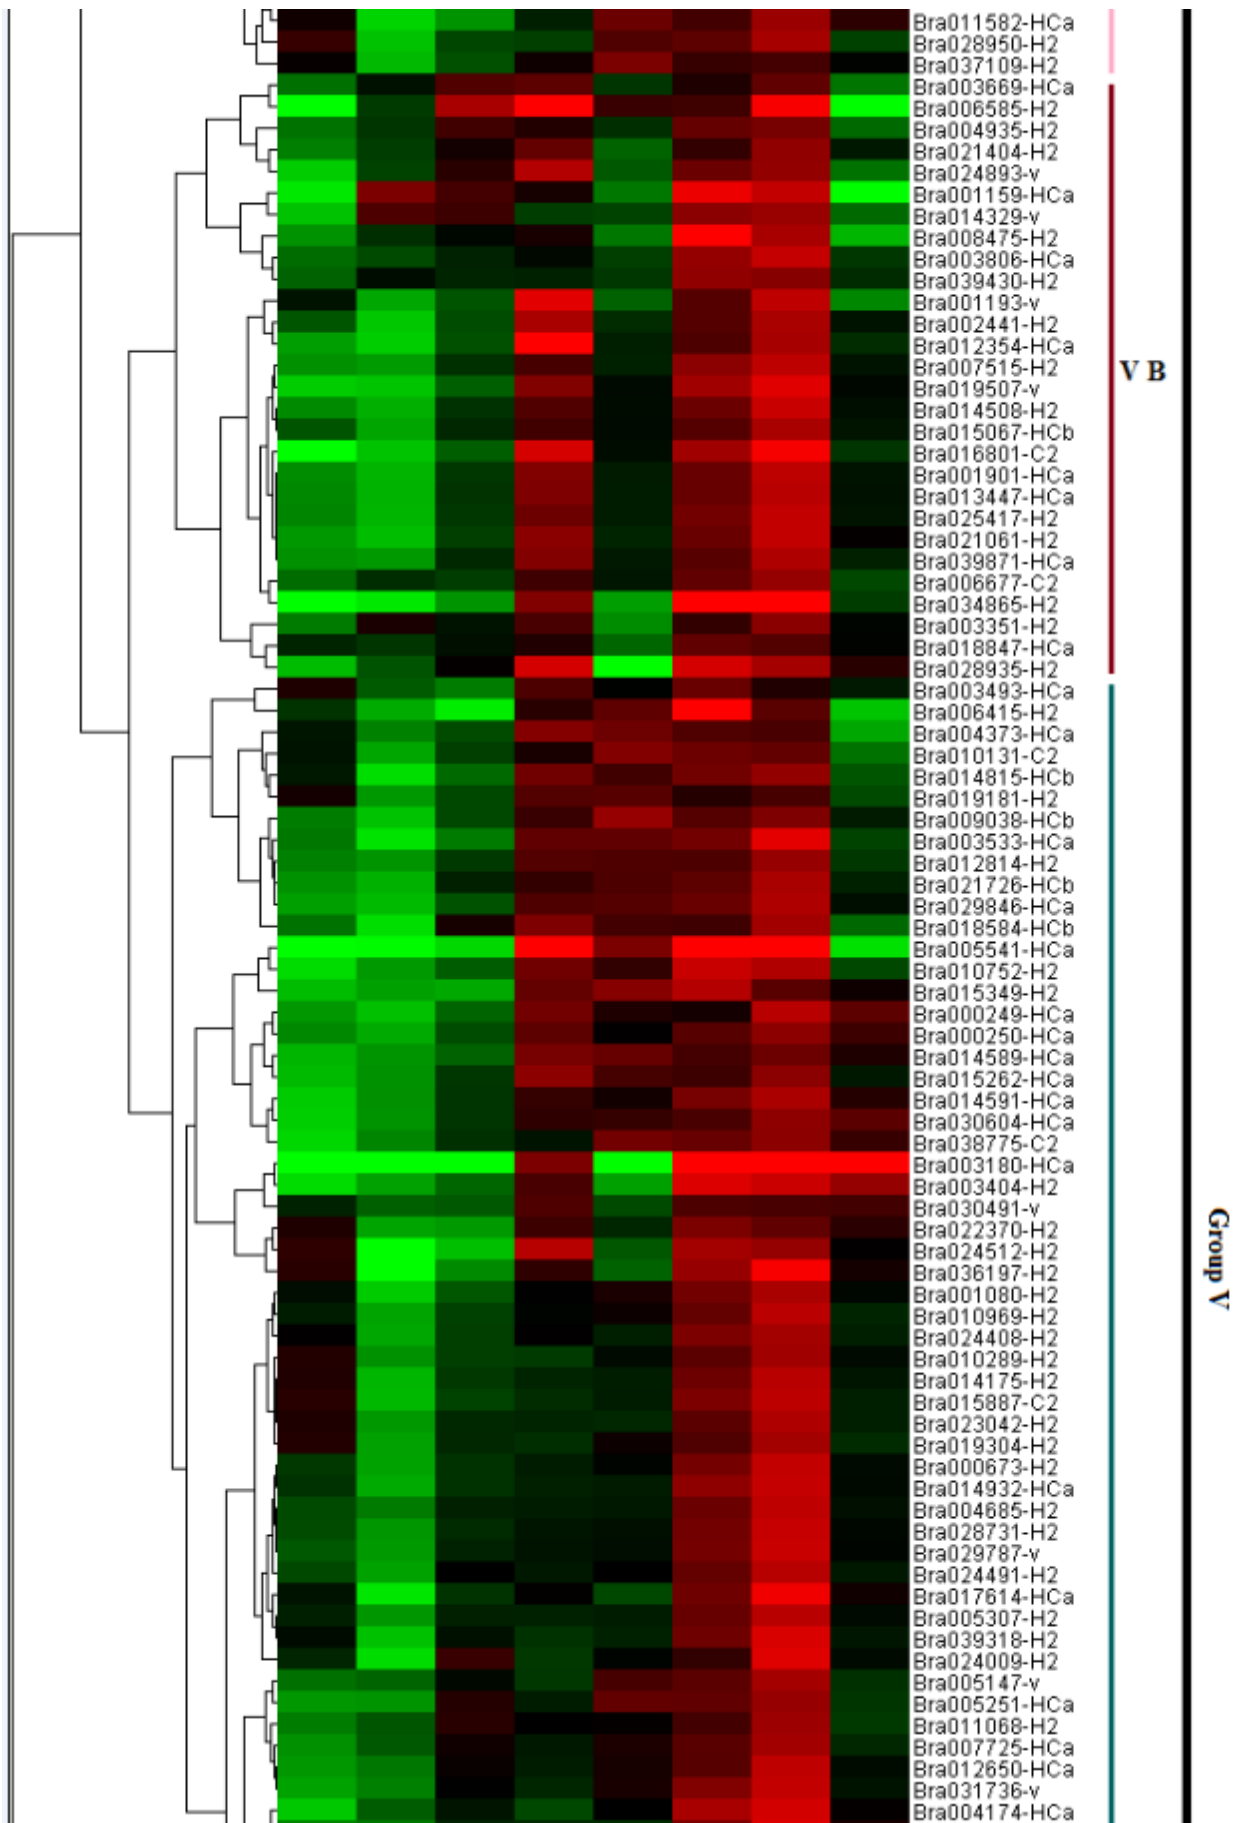

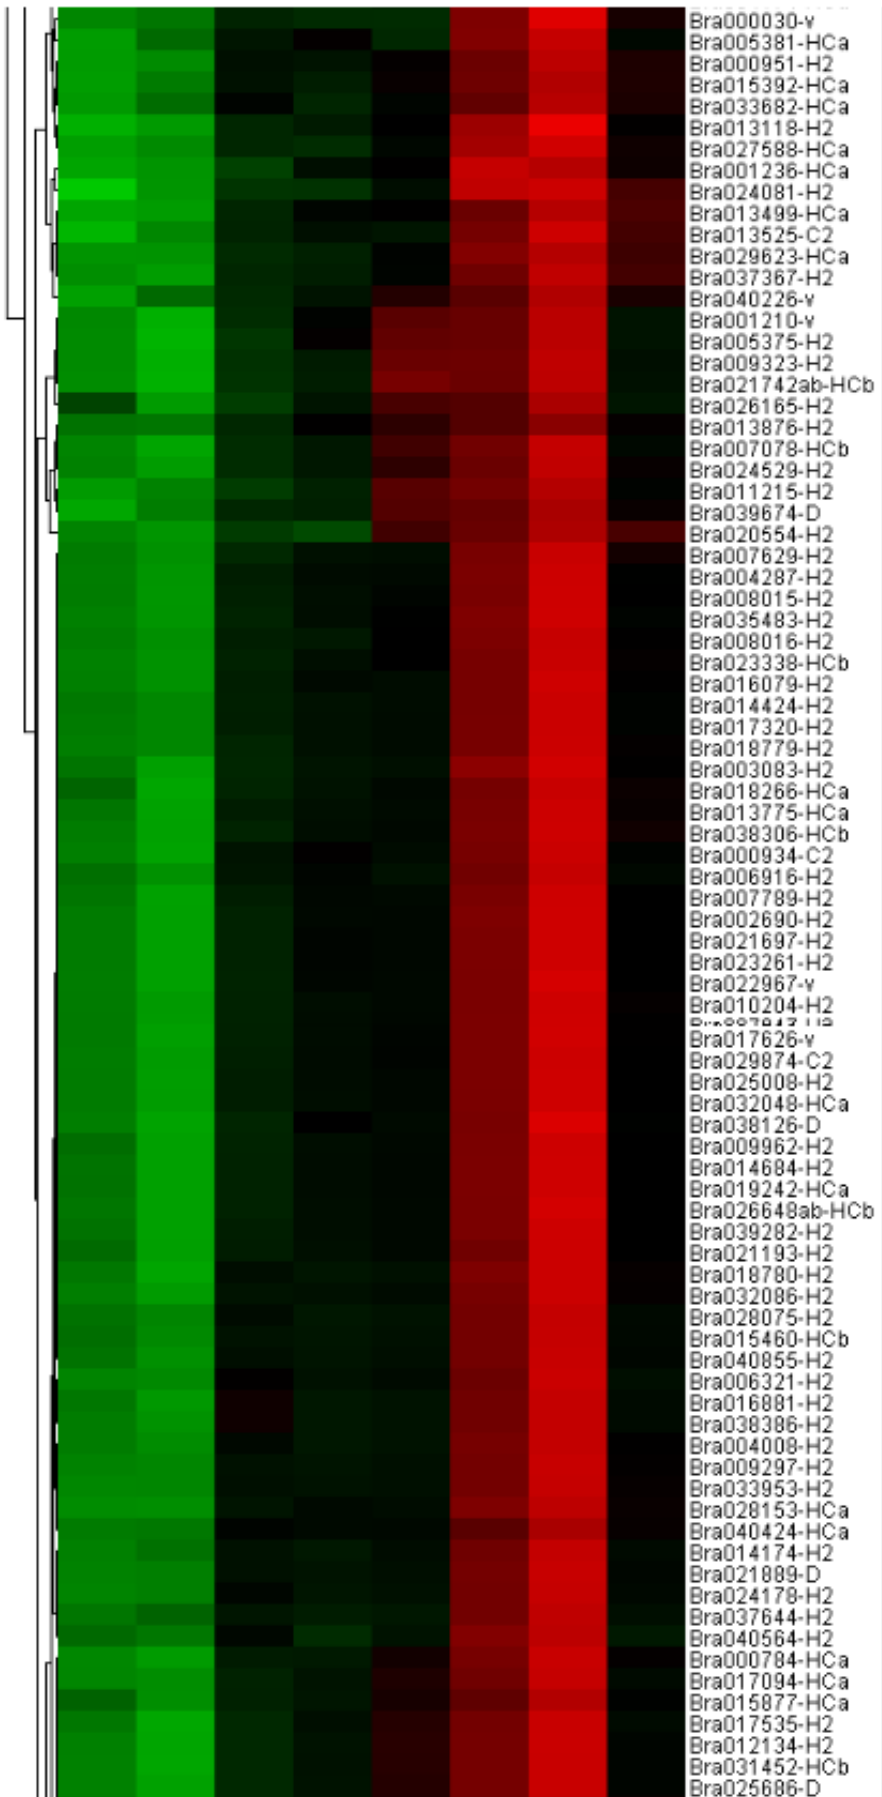

VC

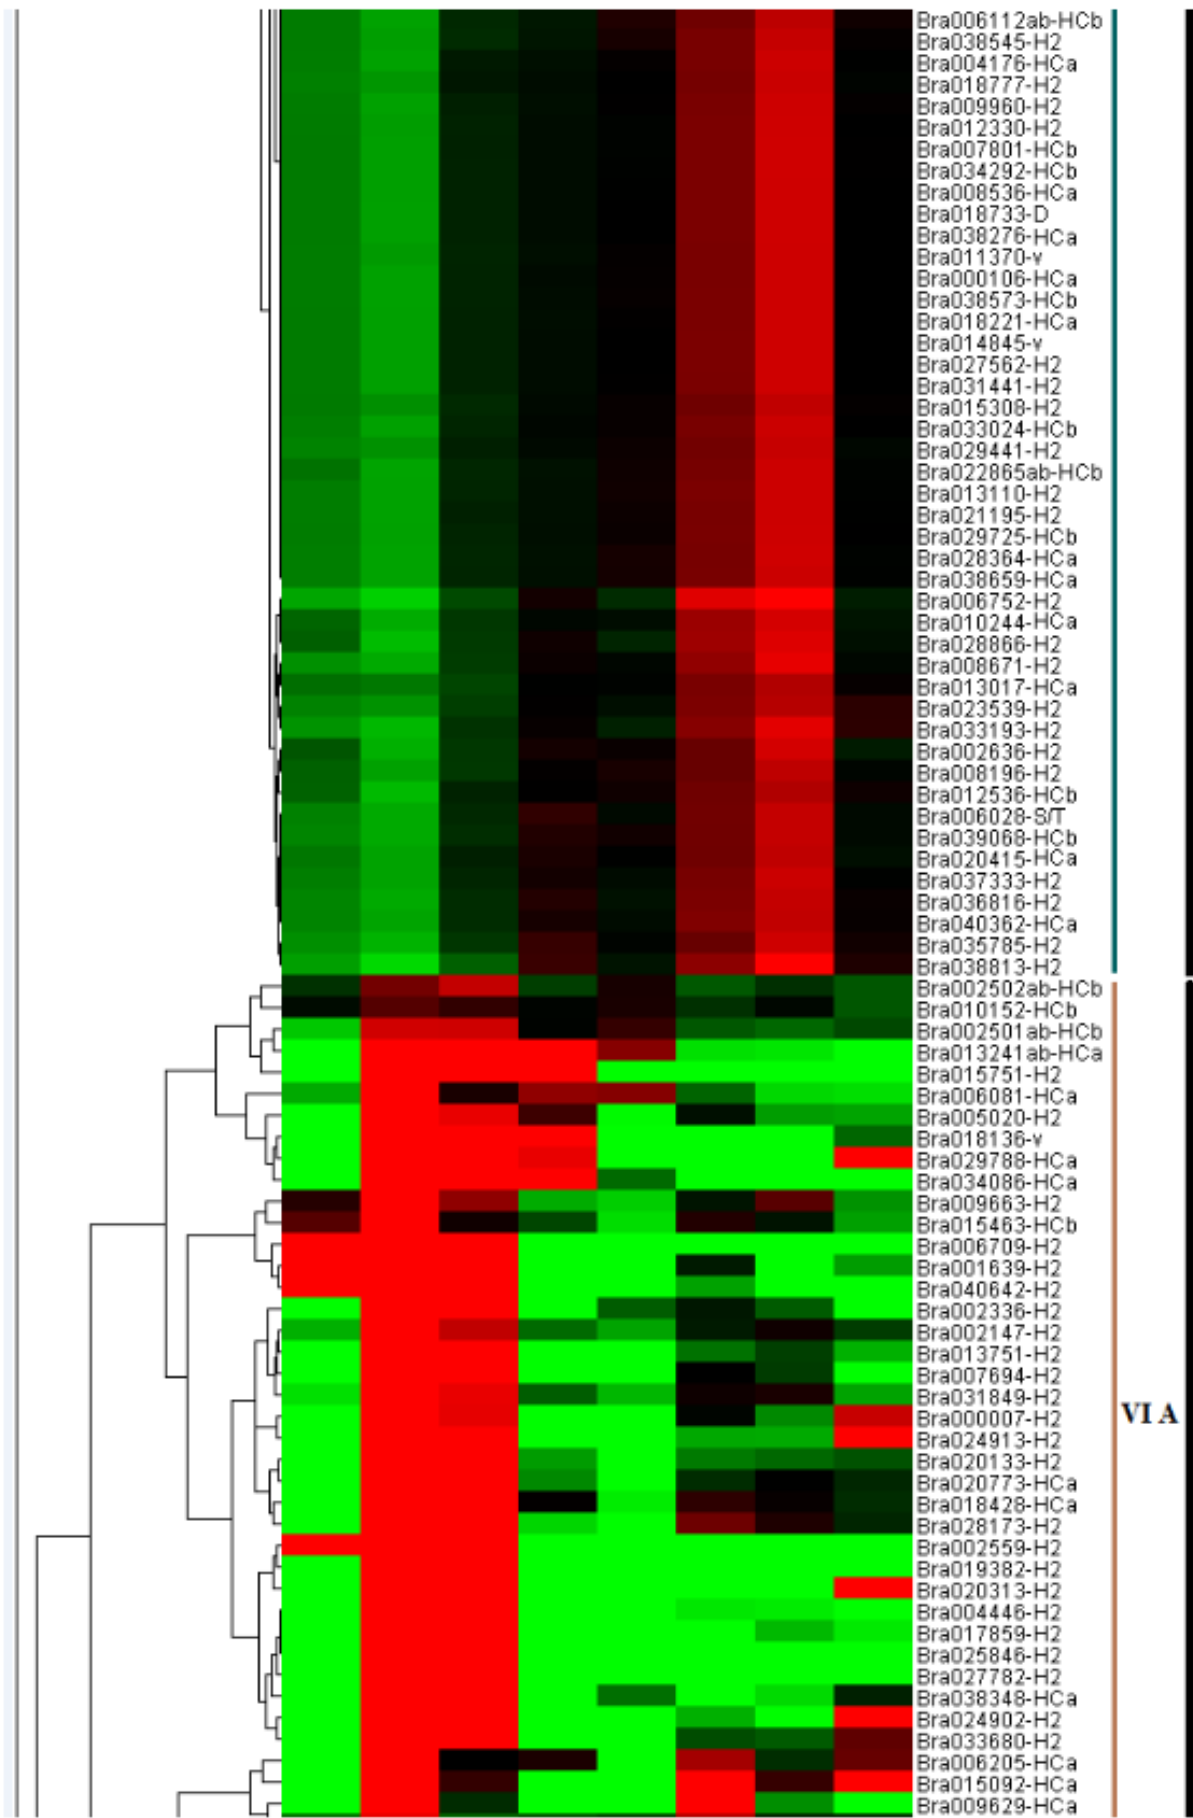

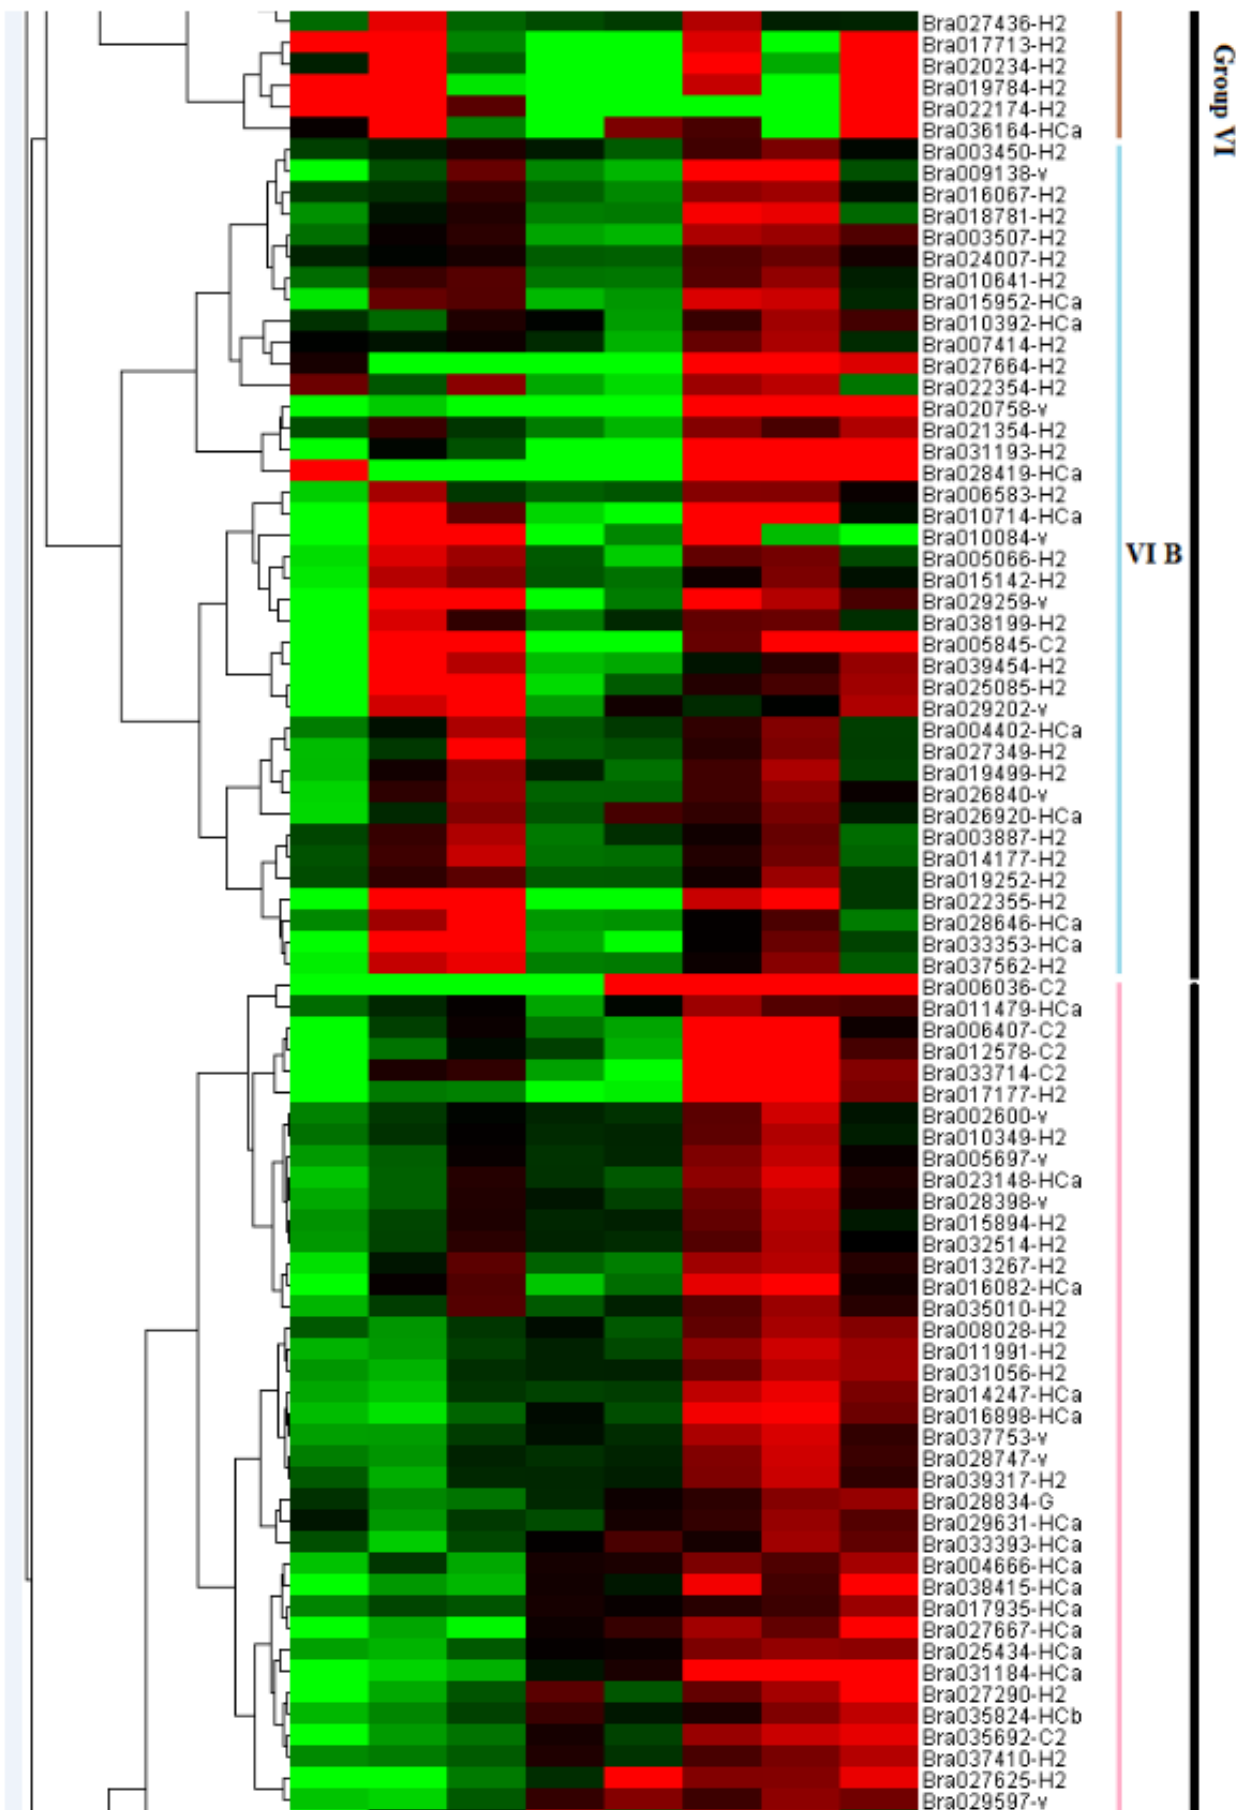

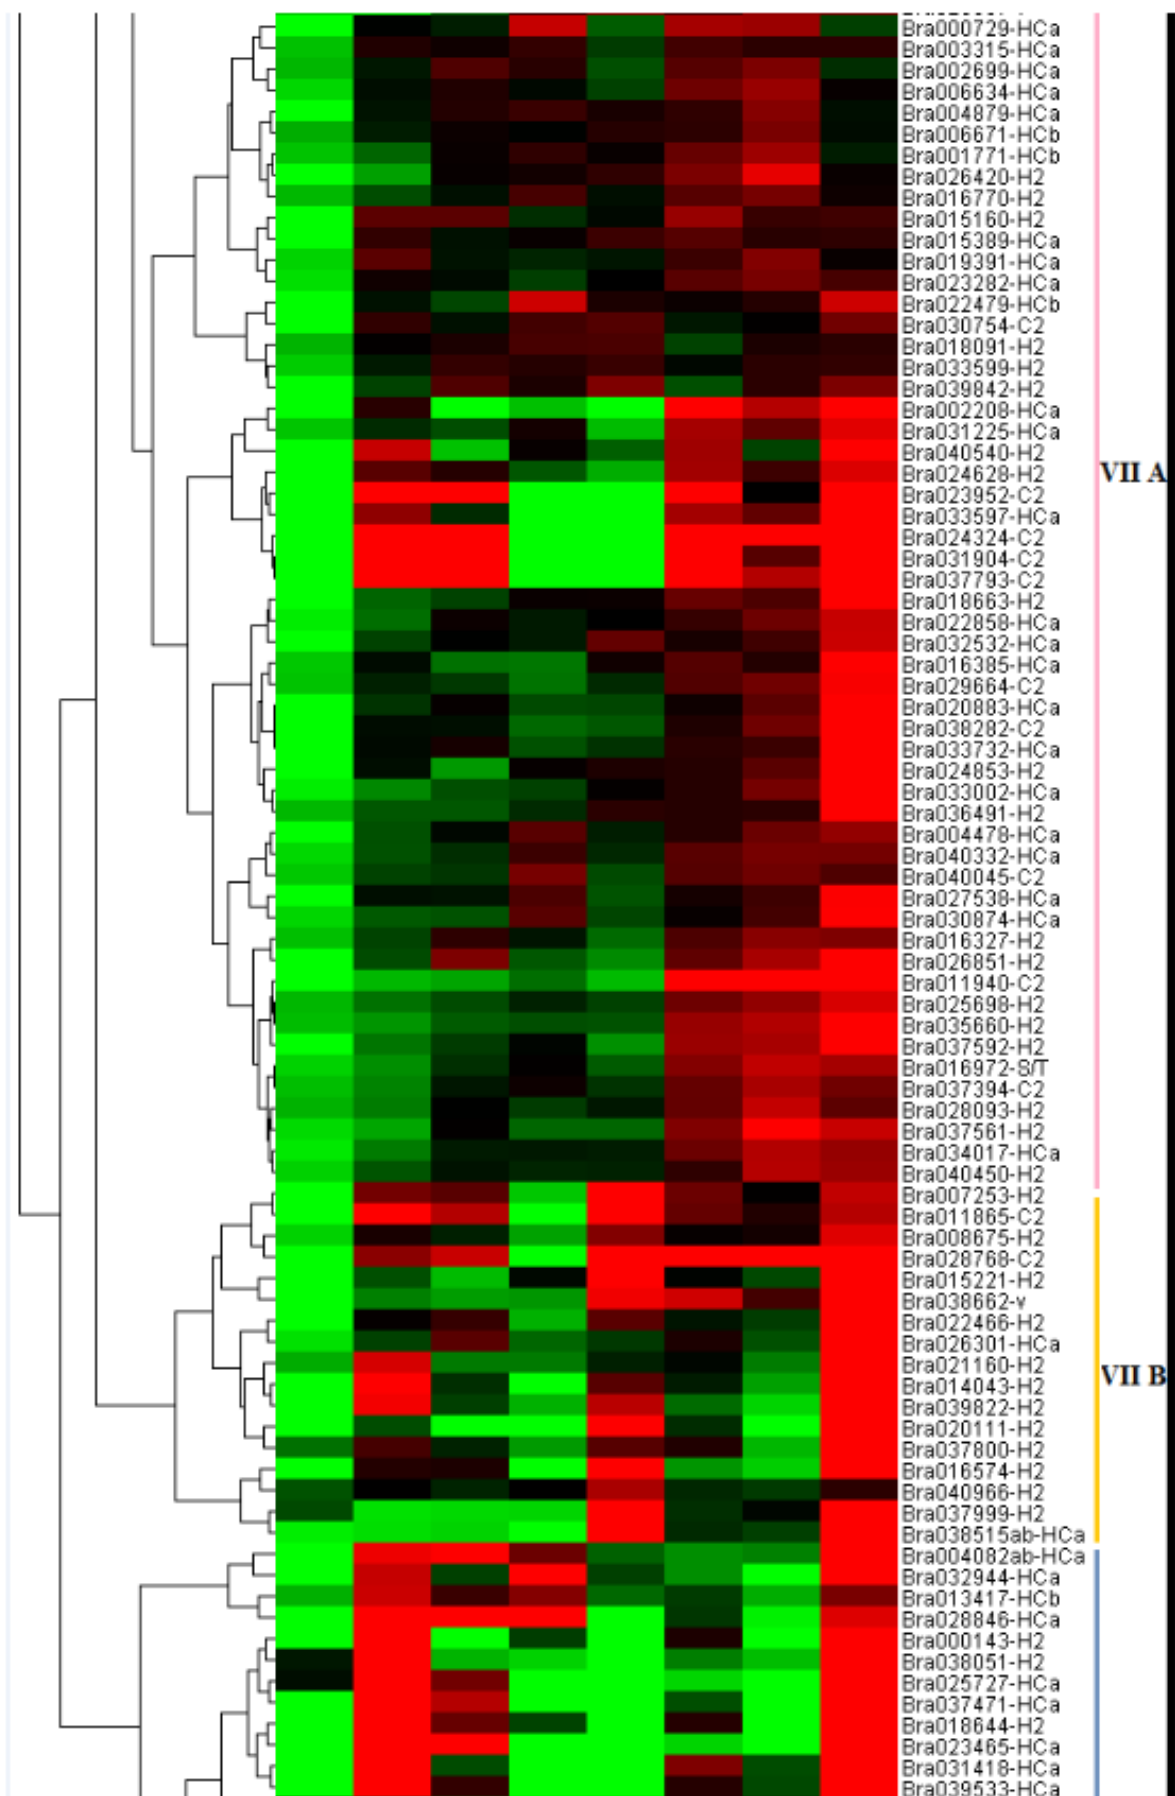

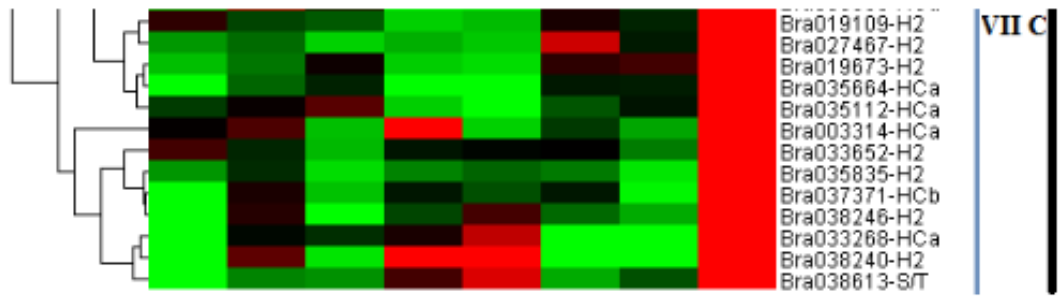

Supplement: srep40690-s1.pdf [file srep40690-s1.pdf]
